# Supplementary material
Source: Royal Society of Chemistry journal article supplement (doi:10.1039/d6dt00716c)
Supplement: d6dt00716c1.pdf [file d6dt00716c1.pdf]

# Exploring the noncovalent chemistry in the catalytic centers of Snake Venom Metalloproteinases: A computational perspective.

*Carles Jaume Rodríguez,<sup>a</sup> Catalina Nicolau,<sup>a</sup> Antonio Bauzá<sup>\*a</sup>*

<sup>a</sup>Ctra. de Valldemossa, km. 7.5, Universitat de les Illes Balears, 07122, Palma de  
Mallorca, Islas Baleares, Spain. E-mail: [antonio.bauza@uib.es](mailto:antonio.bauza@uib.es)

|                                                     |         |
|-----------------------------------------------------|---------|
| <b>Figure S1</b>                                    | page 2  |
| <b>Figure S2</b>                                    | page 3  |
| <b>Figure S3</b>                                    | page 4  |
| <b>Figure S4</b><br>5                               | page    |
| <b>Figure S5</b><br>6                               | page    |
| <b>Table S1</b>                                     | page 6  |
| <b>Cartesian coordinates of the cluster models</b>  | page 8  |
| <b>Cartesian coordinates of the MET···Zn models</b> | page 45 |

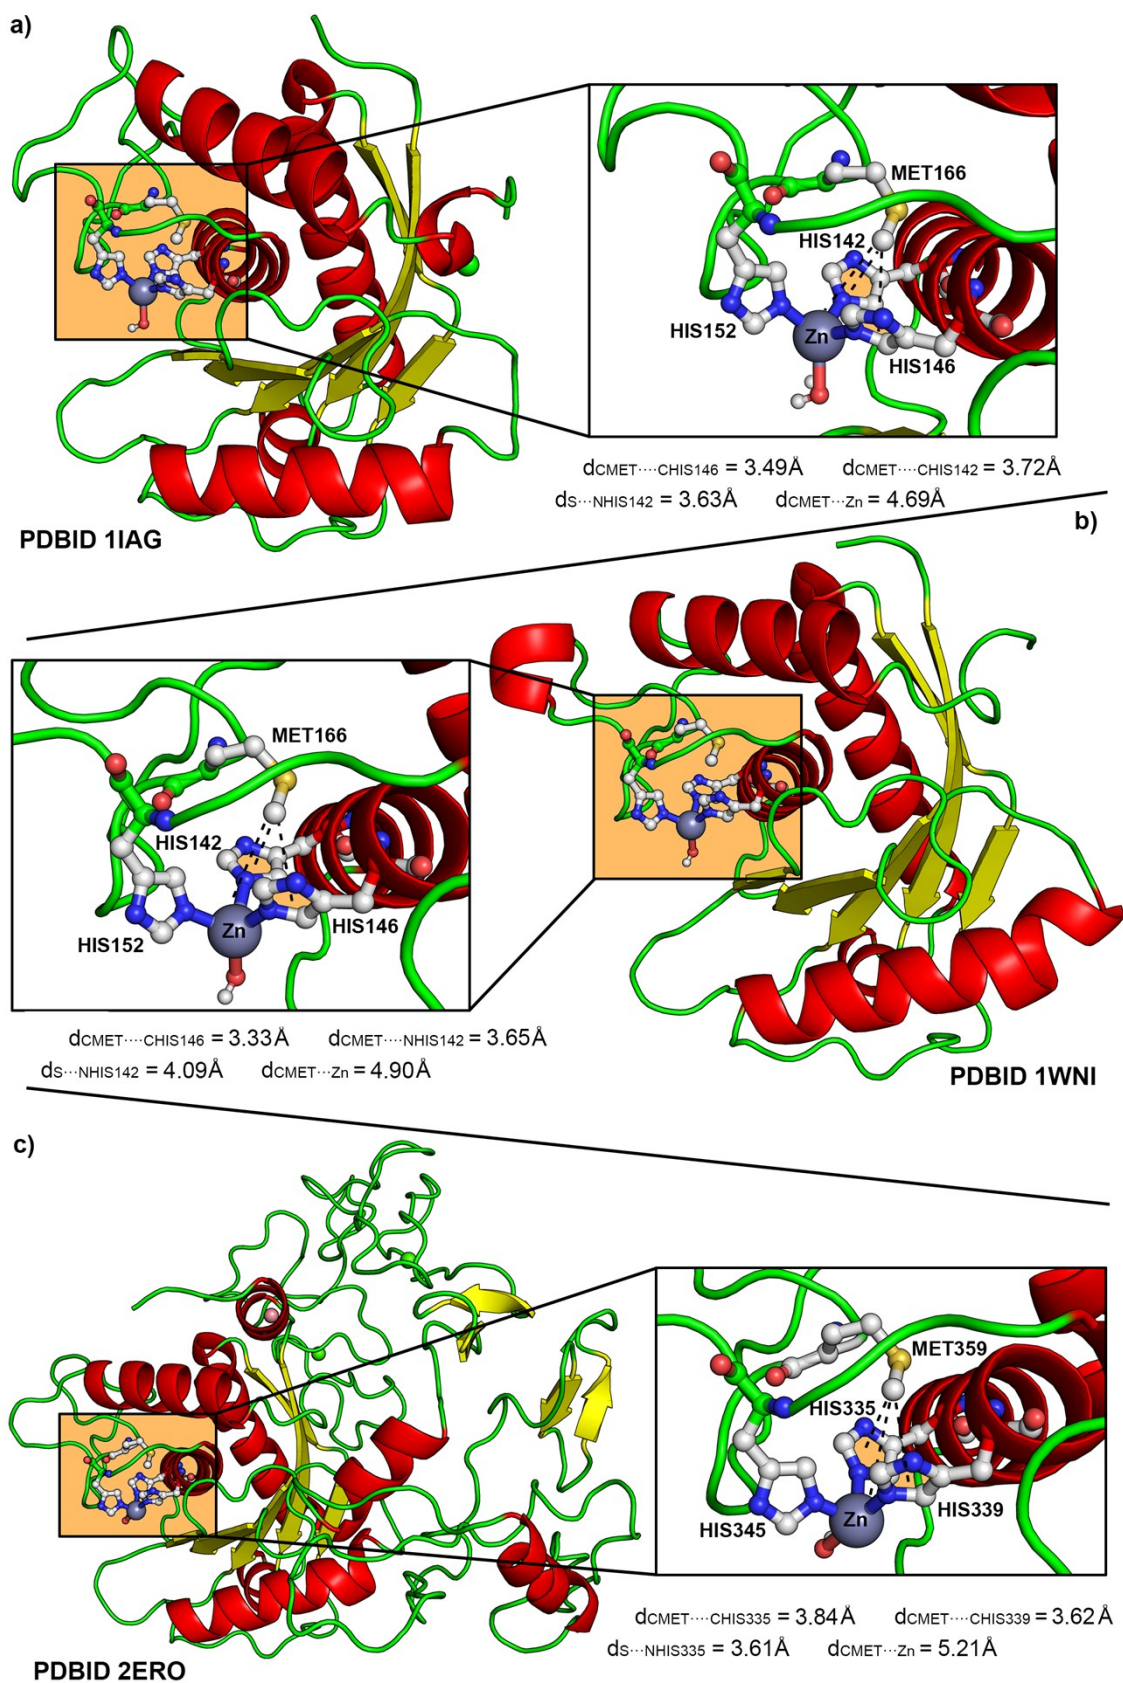

**Figure S1.** Partial views of the X-ray structures corresponding to PDBIDs (a) 1IAG, (b) 1WNI and (c) 2ERO. The NCIs involving the MET residue and the Zn(II) center are magnified inside the square parts of the figure with indication of the  $\text{S}\cdots\text{HIS}$ ,  $\text{C}_{\text{MET}}\cdots\text{HIS}$  and  $\text{C}\cdots\text{Zn}$  distance values.

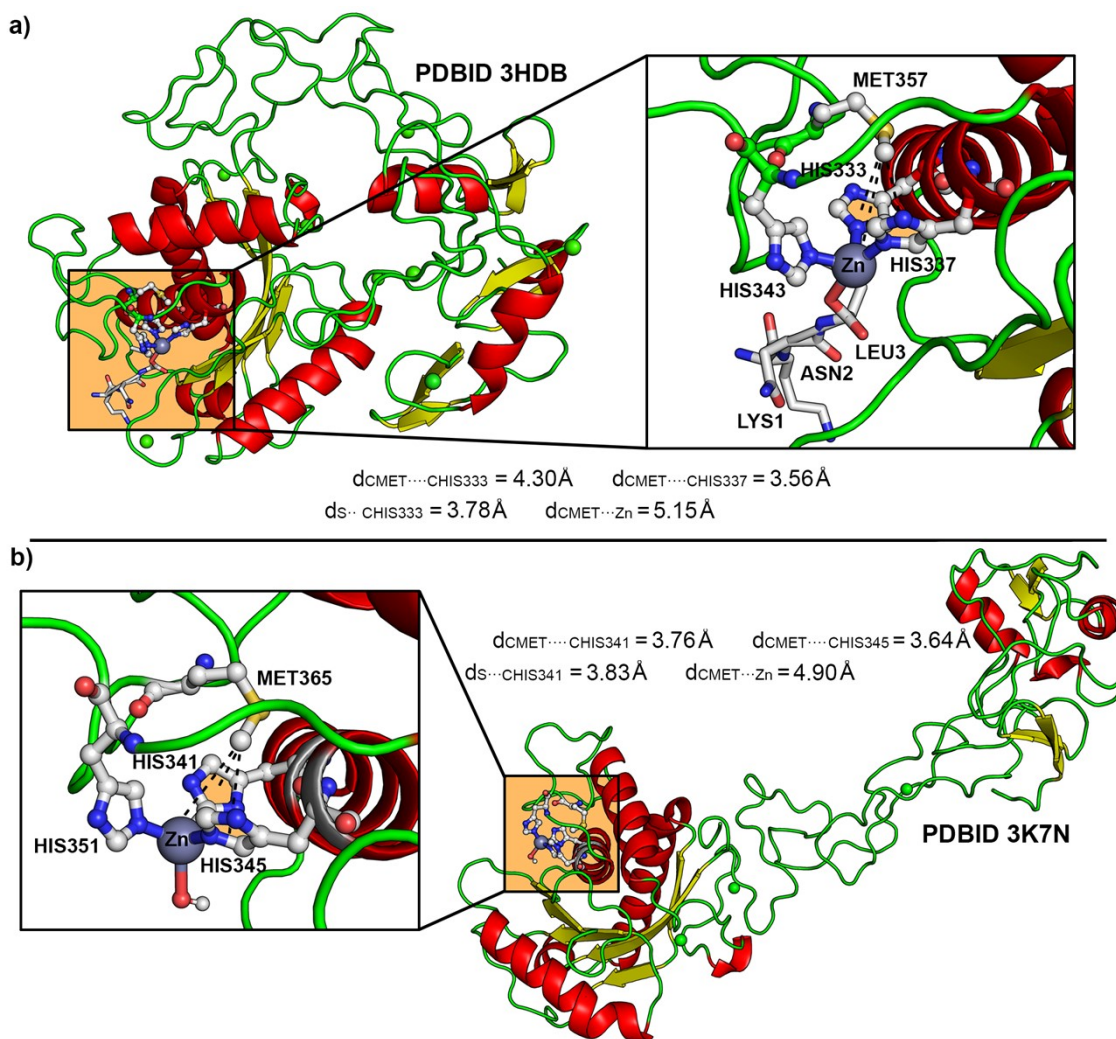

**Figure S2.** Partial views of the X-ray structures corresponding to PDBIDs (a) 3HDB and (b) 3K7N. The NCIs involving the MET residue and the Zn(II) center are magnified inside the square parts of the figure with indication of the  $S \cdots HIS$ ,  $C_{MET} \cdots HIS$  and  $C \cdots Zn$  distance values.

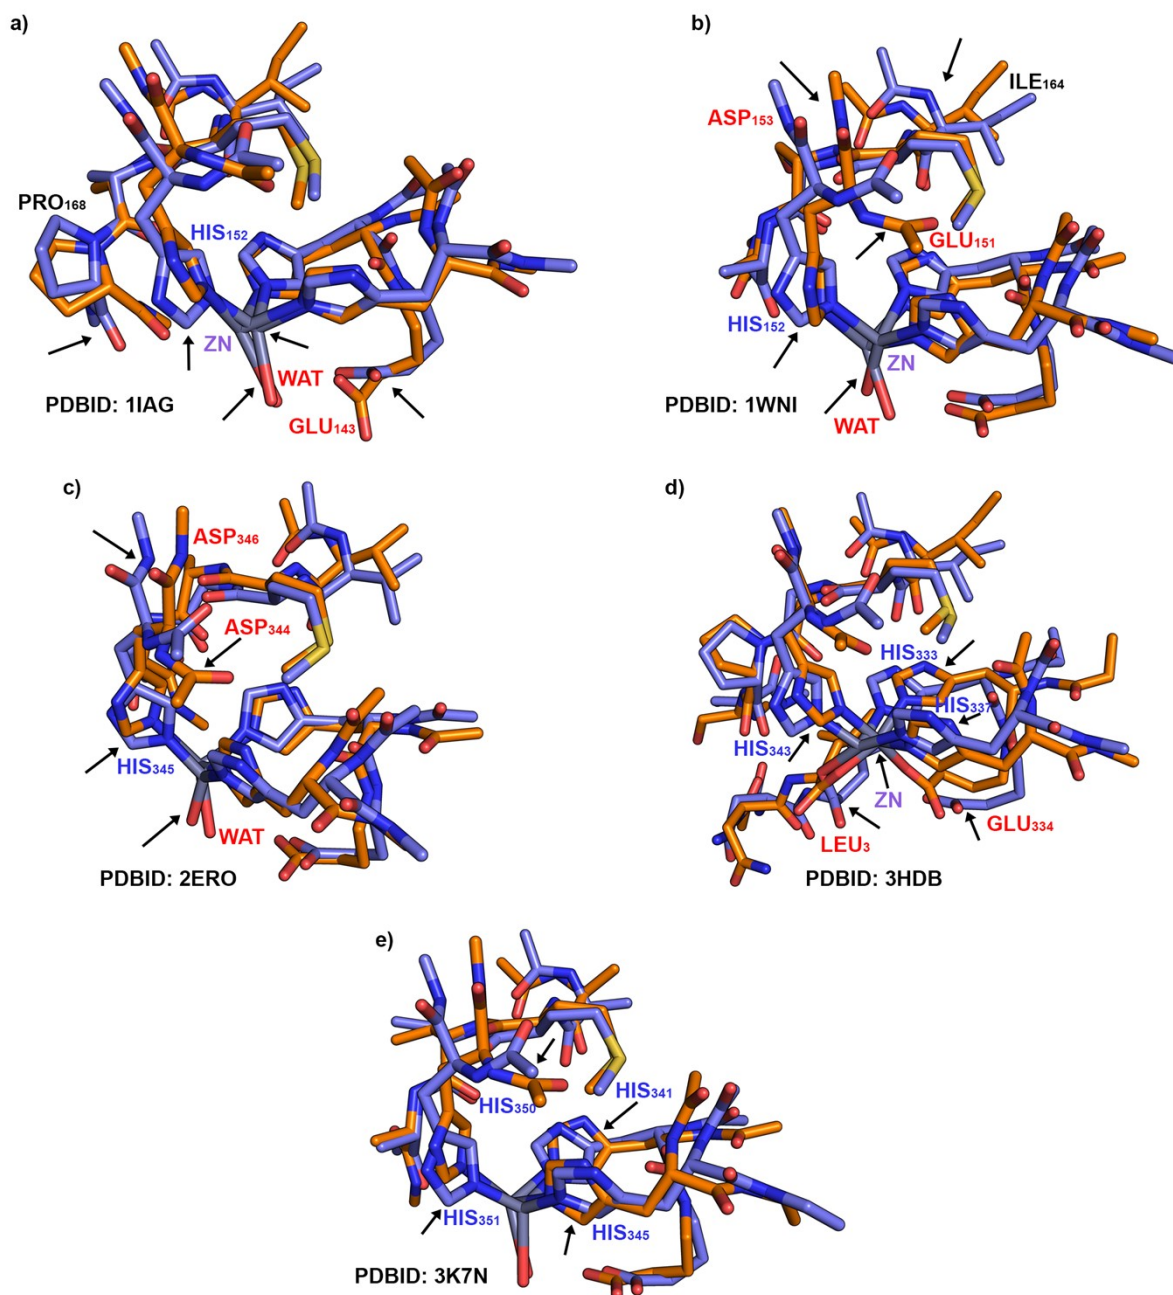

**Figure S3.** Structural superposition between the initial (colored in blue) and final (colored in orange) xTB geometries in 1IAG, 1WNI, 2ERO, 3HDB and 3K7N structures. The protein residues/groups that changed their position more noticeably during calculations were highlighted using black arrows.

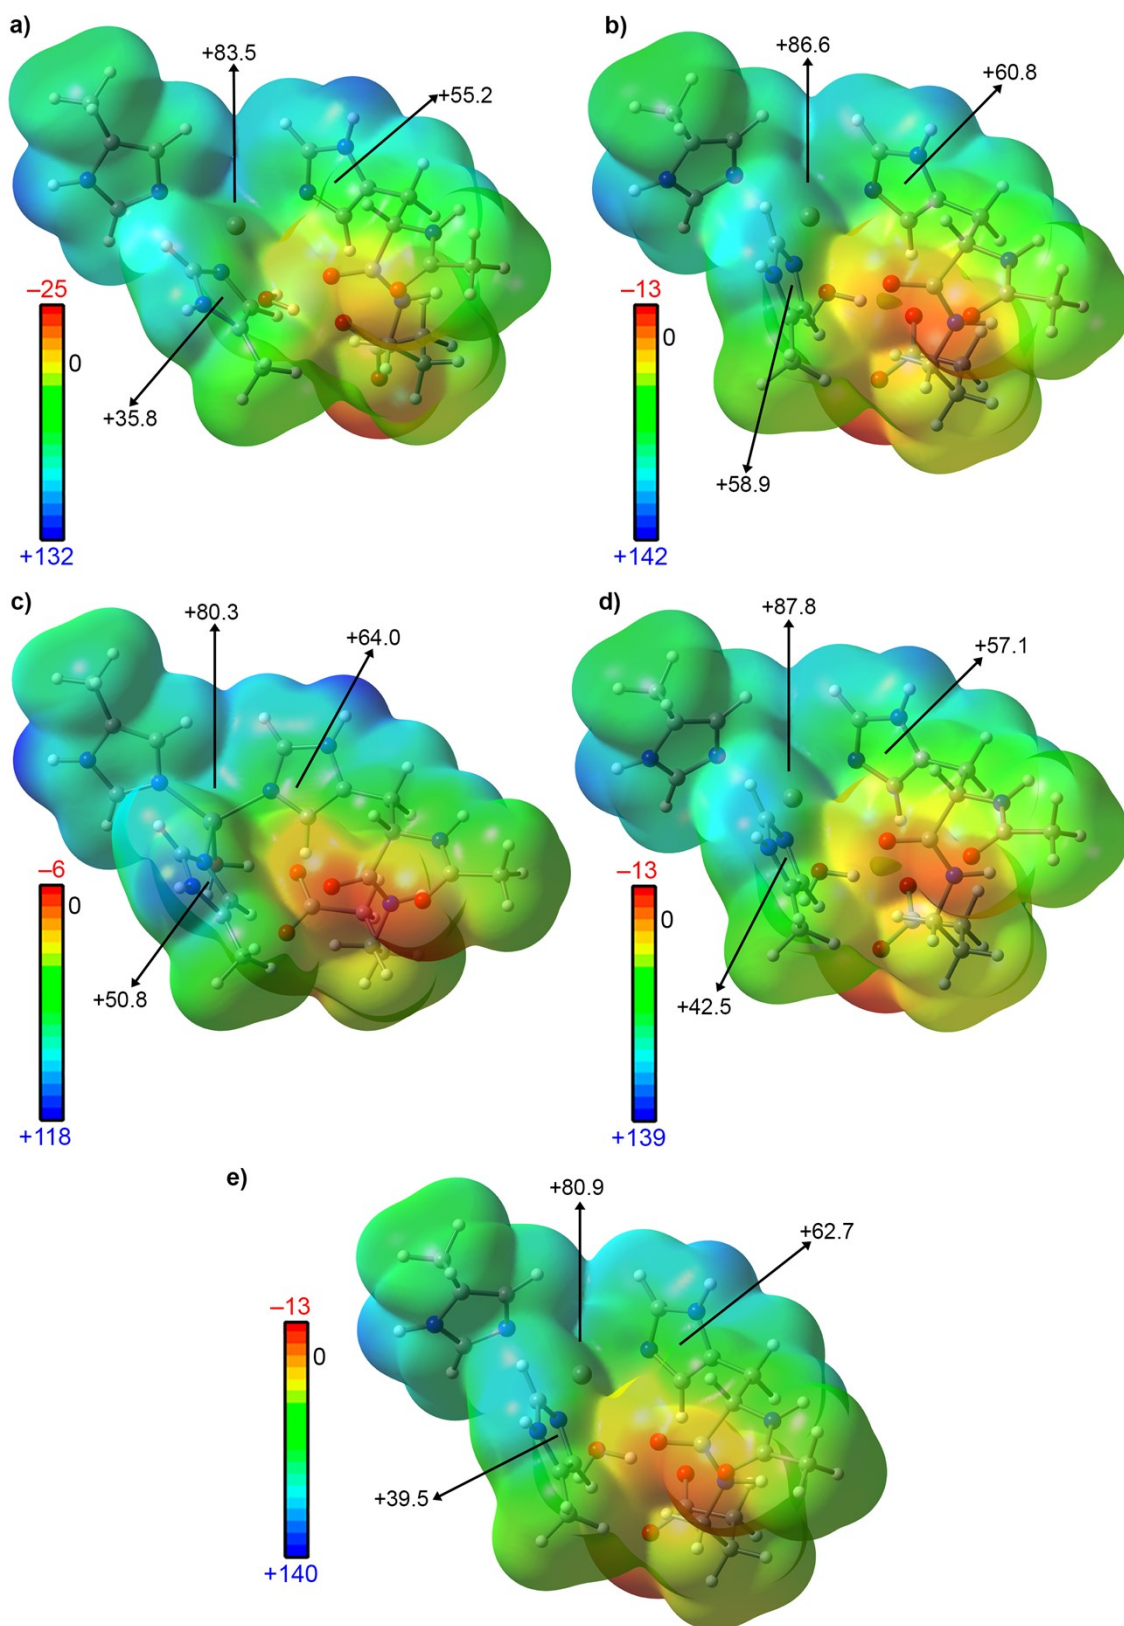

**Figure S4.** MEP values (in kcal·mol<sup>-1</sup>) over the Zn-HIS pocket in (a) 1IAG, (b) 1WNI, (c) 2DW2, (d) 2ERO and (e) 3K7N structures. Energy values at concrete points of the surface are given in kcal·mol<sup>-1</sup> (0.001 a.u.).

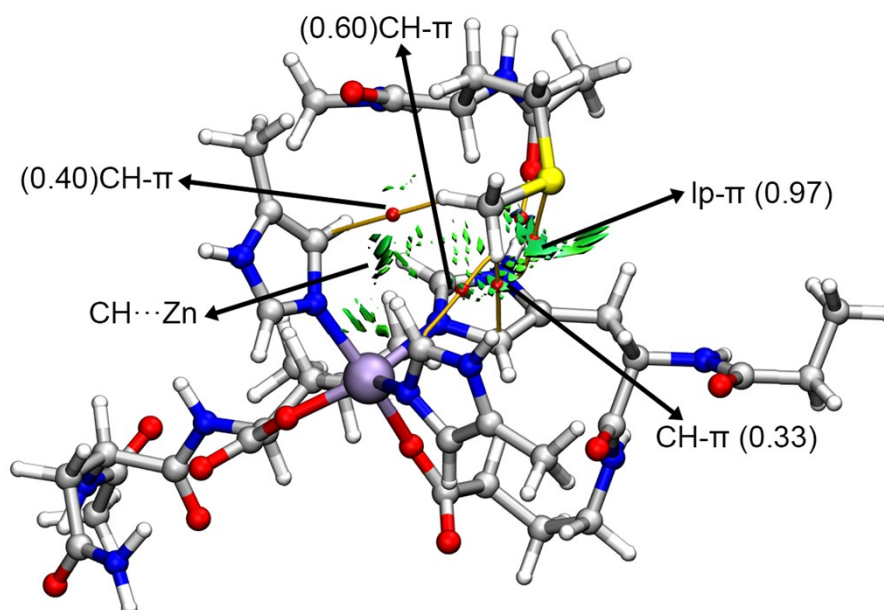

**Figure S5.** NCIplot analysis and QTAIM distribution of intermolecular bcps (in red spheres) and bond paths in PDBID-3HDB. The name of the NCIs involved in the MET $\cdots$ Zn recognition is also indicated, including the values of the density at the bcps that characterize those interactions in a.u. (into parenthesis). NCIplot surfaces only include intermolecular contacts between MET residue and the Zn(II) centre. NCIplot colour range  $-0.04 \text{ au} \leq (\text{sign}\lambda_2)\rho \leq +0.04 \text{ au}$ . Isosurface value  $\text{RDG} = 0.5$  and  $\rho$  cutoff  $0.05 \text{ a.u.}$

**Table S1.** Values of the electron density ( $\rho$ ), its laplacian ( $\nabla^2\rho$ ), potential ( $V$ ) and kinetic ( $G$ ) energies in a.u. and the  $-G/V$  ratio at the PBE0-D3/def2-TZVP level of theory characterizing the S  $\text{lp}-\pi$  and  $\text{CH}-\pi$  interactions present in structures 1IAG, 1WNI, 2ERO, 3HDB and 3K7N.

| PDBID | Interaction     | $\rho$ | $\nabla^2\rho$ | $V$   | $G$  | $-G/V$ |
|-------|-----------------|--------|----------------|-------|------|--------|
| 1IAG  | $\text{lp}-\pi$ | 0.87   | 2.86           | -0.45 | 0.58 | 1.28   |
|       | $\text{CH}-\pi$ | 0.32   | 1.02           | -0.14 | 0.20 | 1.43   |
|       | $\text{CH}-\pi$ | 0.69   | 2.40           | -0.39 | 0.49 | 1.26   |
|       | $\text{CH}-\pi$ | 0.57   | 1.79           | -0.30 | 0.37 | 1.23   |

|             |           |      |      |       |      |      |
|-------------|-----------|------|------|-------|------|------|
| <b>1WNI</b> | Lp- $\pi$ | 0.62 | 2.10 | -0.29 | 0.41 | 1.41 |
|             | CH- $\pi$ | 0.40 | 1.31 | -0.19 | 0.26 | 1.37 |
|             | CH- $\pi$ | 0.38 | 1.32 | -0.18 | 0.26 | 1.44 |
| <b>2ERO</b> | Lp- $\pi$ | 0.62 | 2.16 | -0.30 | 0.42 | 1.40 |
|             | CH- $\pi$ | 0.66 | 2.38 | -0.36 | 0.48 | 1.33 |
|             | CH- $\pi$ | 0.41 | 1.40 | -0.20 | 0.28 | 1.40 |
| <b>3HDB</b> | Lp- $\pi$ | 0.97 | 0.32 | -0.54 | 0.66 | 1.22 |
|             | CH- $\pi$ | 0.40 | 1.23 | -0.18 | 0.25 | 1.39 |
|             | CH- $\pi$ | 0.60 | 1.82 | -0.30 | 0.38 | 1.27 |
|             | CH- $\pi$ | 0.33 | 2.04 | -0.34 | 0.42 | 1.24 |
| <b>3K7N</b> | Lp- $\pi$ | 0.91 | 3.03 | -0.49 | 0.62 | 1.27 |
|             | CH- $\pi$ | 0.68 | 2.40 | -0.38 | 0.49 | 1.29 |
|             | CH- $\pi$ | 0.53 | 1.72 | -0.28 | 0.35 | 1.25 |

## Cartesian coordinates of the cluster models

### Cluster model of 1BUD

|   |                   |                   |                   |
|---|-------------------|-------------------|-------------------|
| C | 19.88165323990316 | 12.56577022091141 | 20.63082713849669 |
| C | 20.49399999999996 | 13.92800000000000 | 20.85300000000001 |
| O | 21.67328510120327 | 14.10442566508717 | 21.12107660205811 |
| N | 19.61853745228912 | 14.94565253072357 | 20.77255962209581 |
| C | 19.99999999999999 | 16.34300000000000 | 20.85200000000001 |
| C | 20.66700000000001 | 16.69099999999998 | 22.19500000000001 |
| O | 21.64843531009043 | 17.41851114548108 | 22.25140265084013 |
| C | 18.68803791102681 | 17.12874683716031 | 20.66665826412706 |
| C | 18.86568140692057 | 18.59396888474927 | 20.55033949467018 |
| N | 18.82172151829538 | 19.23410679926277 | 19.34565266023257 |
| C | 19.05914929550078 | 19.56918459549335 | 21.48562378565189 |
| C | 18.98444968632427 | 20.54154289559818 | 19.57723565090216 |
| N | 19.12932140255391 | 20.77159344869880 | 20.86048971196934 |
| N | 20.08461795813509 | 16.14706937160026 | 23.26630407829031 |
| C | 20.53067727111929 | 16.38000255318139 | 24.62344052930622 |
| C | 19.36270722127097 | 16.43531485445317 | 25.60321954982475 |
| C | 18.37122041753137 | 17.54399279756868 | 25.27340346762477 |
| C | 18.96419901452763 | 18.97471448512580 | 25.35803727520273 |
| O | 20.03888013497479 | 19.16039970698424 | 25.94962243914229 |
| O | 18.26541780170870 | 19.86352591947580 | 24.80459936898852 |
| C | 24.92359024764945 | 16.04002334768190 | 21.49232925698876 |
| C | 25.55200000000001 | 16.97099999999999 | 22.49600000000003 |
| O | 26.76088838172586 | 17.07509725045151 | 22.66077469998259 |
| N | 24.66801705527743 | 17.68395009839423 | 23.22706596061553 |
| C | 25.15500000000002 | 18.77099999999999 | 24.04400000000001 |
| C | 26.22600000000005 | 18.32100000000002 | 25.04999999999997 |
| O | 27.18996825093733 | 19.03067215676911 | 25.29804834659110 |
| C | 24.01015487367057 | 19.47393802176149 | 24.79909612459093 |
| C | 23.33935158295900 | 20.47906761594797 | 23.93269759189373 |
| N | 23.82374261034801 | 21.75098864983506 | 23.77079869395483 |
| C | 22.23982661662462 | 20.40350880910679 | 23.12580561515352 |
| C | 23.01602274159192 | 22.38224079441968 | 22.89771741380011 |
| N | 22.04904435503785 | 21.59286713540665 | 22.48756953144371 |
| N | 25.92779179532517 | 17.19876273454049 | 25.71122809441652 |
| C | 26.76041460915835 | 16.64841690651852 | 26.75536467209355 |
| C | 26.25625256983983 | 23.69744238496489 | 19.15897505524021 |

|   |                   |                   |                   |
|---|-------------------|-------------------|-------------------|
| C | 24.98600000000002 | 23.34399999999997 | 18.42400000000003 |
| O | 24.74543085306567 | 22.22200353441526 | 17.99635257328551 |
| N | 24.10585003943578 | 24.35936202831392 | 18.32993772408539 |
| C | 22.98000000000000 | 24.24800000000002 | 17.43600000000000 |
| C | 23.44099999999999 | 24.54300000000000 | 16.01699999999996 |
| O | 24.43723882472119 | 25.21874130936715 | 15.78746368062444 |
| C | 21.88071956137242 | 25.26325607664156 | 17.77059739360660 |
| C | 21.37231416249130 | 25.10722728052129 | 19.15863954136863 |
| N | 20.58064455362668 | 26.04779880054120 | 19.76336205861498 |
| C | 21.51335140880712 | 24.10403011784646 | 20.07244272589445 |
| C | 20.27775986608313 | 25.58748812255081 | 20.99549393056323 |
| N | 20.82715542494379 | 24.41649299343137 | 21.20959673119282 |
| N | 22.64491535698661 | 24.02928865304095 | 15.07450057093033 |
| C | 22.89393242995791 | 24.16227335843071 | 13.65713410863674 |
| C | 18.56402288088785 | 18.12584233929333 | 11.50343705315813 |
| C | 18.47000000000000 | 18.11700000000003 | 13.00700000000001 |
| O | 17.89655015841848 | 18.98099049344467 | 13.66116906498372 |
| N | 19.11271982211264 | 17.09412500575753 | 13.59590334066416 |
| C | 18.95899999999996 | 16.84200000000002 | 15.00700000000000 |
| C | 19.28499999999998 | 18.08199999999998 | 15.85600000000001 |
| O | 18.57693641834489 | 18.31976438325890 | 16.82613295762706 |
| C | 19.88632836440892 | 15.68128067102223 | 15.45035980120938 |
| C | 19.37850393482325 | 14.33802282228939 | 14.90394734310908 |
| C | 19.99551094761533 | 15.62494973420924 | 16.97444836869584 |
| C | 20.46187191151714 | 13.26315018973090 | 14.90293728211416 |
| N | 20.31796469511690 | 18.85333131566962 | 15.49696019661157 |
| C | 20.74900000000003 | 19.98500000000000 | 16.29900000000000 |
| C | 20.08300000000000 | 21.30600000000001 | 15.94200000000001 |
| O | 20.57977510257388 | 22.38084774627076 | 16.26417304041246 |
| C | 22.27346737391841 | 20.09922167219010 | 16.30880156753574 |
| C | 22.94776620208332 | 18.88373427147575 | 16.93401852329245 |
| S | 22.21656134799791 | 18.36451141568872 | 18.53066934187594 |
| C | 22.61428607691070 | 19.77654094324488 | 19.58202599774149 |
| N | 18.93376144189839 | 21.22665369729223 | 15.26496258899293 |
| C | 18.13200000000002 | 22.40400000000000 | 15.00799999999999 |
| C | 17.68100000000000 | 23.04500000000003 | 16.33700000000000 |
| O | 17.40099314311221 | 22.32588739220721 | 17.29138102378447 |
| C | 16.87370044114976 | 21.99494330125690 | 14.23528187685742 |

|    |                   |                   |                   |
|----|-------------------|-------------------|-------------------|
| O  | 16.04134843210532 | 23.12524729775563 | 14.10358010381488 |
| N  | 17.62962590049272 | 24.37806654688065 | 16.40986190059629 |
| C  | 17.20299999999998 | 25.04400000000003 | 17.64199999999998 |
| C  | 15.70100000000003 | 24.86400000000004 | 17.91600000000003 |
| O  | 15.23083015709490 | 25.14685822020102 | 19.00964597230204 |
| C  | 17.53338428671012 | 26.51569592812464 | 17.38248657691424 |
| C  | 17.34441742377433 | 26.64713704593424 | 15.87302721737379 |
| C  | 17.91053816052781 | 25.33134768721028 | 15.34342187051455 |
| N  | 14.96863640124291 | 24.46937673088753 | 16.86677693547632 |
| C  | 13.55306115510497 | 24.19174118774879 | 16.95022381432738 |
| Zn | 19.91900000000003 | 22.36800000000001 | 22.18600000000001 |
| O  | 19.59172903583438 | 22.13415396343860 | 24.73364401343810 |
| H  | 20.65370678438354 | 11.80832896304586 | 20.72586387175522 |
| H  | 19.77302326432112 | 16.62412917773482 | 26.59628601525419 |
| H  | 18.84504546006829 | 15.47328139188959 | 25.61821022224323 |
| H  | 17.53520634883461 | 17.52212346273694 | 25.97754113075635 |
| H  | 17.95641460666399 | 17.43389046152825 | 24.26927384986187 |
| H  | 21.05947160240271 | 17.33594142760115 | 24.63850175637557 |
| H  | 25.61280203766057 | 15.23638644380907 | 21.25300349473967 |
| H  | 27.55011050151995 | 17.36887255259589 | 26.96016069655618 |
| H  | 26.03110278244723 | 24.26466811350305 | 20.05725175677923 |
| H  | 23.74996630691593 | 24.82192912833579 | 13.52650980721289 |
| H  | 18.01457563811472 | 17.27788233672395 | 11.10024962960714 |
| H  | 20.88219497318151 | 15.87738359408090 | 15.03927311951090 |
| H  | 20.53097887652758 | 16.48378521316339 | 17.37307397109759 |
| H  | 19.00381501848527 | 15.60068624242257 | 17.41933643545027 |
| H  | 20.53651438487346 | 14.73484190644624 | 17.28105632874763 |
| H  | 19.01383063691659 | 14.45828257782171 | 13.88241077604363 |
| H  | 18.53639926011817 | 14.00567288141120 | 15.51309711820764 |
| H  | 20.06369889807719 | 12.33121267864874 | 14.51010667032079 |
| H  | 20.83282294762718 | 13.07308417010064 | 15.90636343289489 |
| H  | 17.91682645655747 | 16.59246396575403 | 15.24493218747731 |
| H  | 22.54770572243207 | 20.99006480870544 | 16.87500877905531 |
| H  | 22.65014990188586 | 20.22548472692791 | 15.29181951541251 |
| H  | 24.00204243524437 | 19.09399794384776 | 17.10958686762862 |
| H  | 22.85717001656912 | 18.00062779060347 | 16.30419715827585 |
| H  | 21.89083359492627 | 20.57407135219421 | 19.43141549237833 |
| H  | 22.55431727903251 | 19.42518366355622 | 20.60761753417303 |

|   |                   |                   |                   |
|---|-------------------|-------------------|-------------------|
| H | 20.42406849509318 | 19.77301123018715 | 17.32821112454879 |
| H | 16.36772370100262 | 21.20062593868709 | 14.80066000060499 |
| H | 17.16548348567678 | 21.59466858470653 | 13.25871795956611 |
| H | 15.32874856999115 | 22.91784357236896 | 13.48532628947863 |
| H | 18.72733099969212 | 23.11783623780223 | 14.43078345080832 |
| H | 18.57167924992918 | 26.70798155165539 | 17.64799049316557 |
| H | 16.88582858595629 | 27.17285520931280 | 17.95746683419543 |
| H | 17.86350474149372 | 27.50863143095177 | 15.46205245491177 |
| H | 16.28489987175365 | 26.72489030588064 | 15.63359518538489 |
| H | 17.43226148853823 | 25.02313182667692 | 14.41435638378401 |
| H | 18.99353934863744 | 25.40248512786376 | 15.19559319018823 |
| H | 17.73128419545507 | 24.62289976958346 | 18.50240776091873 |
| H | 13.19032408015363 | 24.55931697888207 | 17.90819387934477 |
| H | 20.72349585975311 | 16.59406114785173 | 20.06675405578430 |
| H | 18.03299056276738 | 16.91937219609159 | 21.51586770349882 |
| H | 18.21133082469941 | 16.77777665595962 | 19.74878124509236 |
| H | 19.11313679685100 | 19.49513828899993 | 22.55291822530846 |
| H | 18.94587976144254 | 21.29811054494440 | 18.81907855677757 |
| H | 25.66612322862413 | 19.50895147499176 | 23.40437358547557 |
| H | 24.42600054054461 | 19.97291107073805 | 25.67686434219877 |
| H | 23.27863956041463 | 18.73899255826303 | 25.13525651500592 |
| H | 21.58608830561188 | 19.57043546147238 | 22.96855703437490 |
| H | 23.13630082963488 | 23.39881770396548 | 22.58602240915564 |
| H | 22.58757454770252 | 23.23192159116353 | 17.50748836837364 |
| H | 21.06036769020016 | 25.10188015699112 | 17.06559252705722 |
| H | 22.27108295955347 | 26.27419959007339 | 17.62189622731971 |
| H | 22.06413579389095 | 23.18915993650607 | 20.00200444410741 |
| H | 19.66234515238906 | 26.11161009161125 | 21.69678849591680 |
| H | 24.71757266487110 | 16.60342732661711 | 20.58433904001657 |
| H | 23.98225672000512 | 15.63629148430103 | 21.85366576306211 |
| H | 26.16512082853802 | 16.49125543307428 | 27.65467321862972 |
| H | 27.20621708558469 | 15.70514994159498 | 26.43966982709050 |
| H | 26.88170431892890 | 24.30319012024401 | 18.50610948982919 |
| H | 26.79557708336573 | 22.79155072074434 | 19.41983131122882 |
| H | 22.02349615715700 | 24.59050886895117 | 13.16119314981175 |
| H | 23.12047811312475 | 23.19092194209006 | 13.21600795494845 |
| H | 19.10754995842706 | 12.38139246652523 | 21.37140132707612 |
| H | 19.44105898329515 | 12.51095597522960 | 19.63924735027823 |

|   |                   |                   |                   |
|---|-------------------|-------------------|-------------------|
| H | 20.29484974106229 | 21.98728034135432 | 25.37138827708208 |
| H | 19.03372448153356 | 21.31003340988875 | 24.78016211000978 |
| H | 13.03159936664984 | 24.69948156599021 | 16.13971835550127 |
| H | 13.36680044682949 | 23.11818024779859 | 16.88770240068529 |
| H | 21.30396801438385 | 13.56357824586383 | 14.28379223997856 |
| H | 18.13447270592718 | 19.04253710213669 | 11.11210980259553 |
| H | 19.60156759375628 | 18.04652566040525 | 11.18923037006063 |
| H | 20.85361264644389 | 18.63183288283157 | 14.67095709450129 |
| H | 18.51681954838822 | 20.33106018891363 | 15.03781043992652 |
| H | 18.66649070863436 | 14.74506012832311 | 20.50404352531032 |
| H | 21.87477676902366 | 23.43891198514478 | 15.37229422621444 |
| H | 23.68690817193192 | 17.68147723766398 | 22.97003086286942 |
| H | 25.13472492824568 | 16.65533099447648 | 25.40741251348141 |
| H | 24.43157316047532 | 25.29447262644960 | 18.52535312309480 |
| H | 21.22708204892962 | 15.58782802242300 | 24.92317417540971 |
| H | 23.61836720081437 | 20.12200339298447 | 19.35323627226381 |
| H | 19.31414311776134 | 15.50715590940985 | 23.14463452197699 |
| H | 19.52973864163243 | 16.36827666869059 | 13.03116987273127 |
| H | 24.62601053334021 | 22.13736056714419 | 24.24383959800352 |
| H | 18.66889502352445 | 18.80726455911661 | 18.42961977524060 |
| H | 20.28592909453731 | 26.92574222626981 | 19.36428601715798 |
| H | 15.43018787571156 | 24.17108761890975 | 16.01635387098497 |

**Cluster model of 1IAG**

|   |                   |                   |                   |
|---|-------------------|-------------------|-------------------|
| C | 17.27698722411968 | 12.80647860675251 | 24.52872850836408 |
| C | 17.14820905419300 | 11.44247253552434 | 23.90265669444955 |
| O | 16.09925603239301 | 10.81022875248762 | 23.86574641617267 |
| N | 18.29779046778117 | 10.95146285637671 | 23.39467259509709 |
| C | 18.32683703515710 | 9.71141628789375  | 22.64170210956891 |
| C | 17.46448210671470 | 8.65804669574946  | 23.34365312958981 |
| O | 16.63206659441393 | 8.00746576925486  | 22.72780481300839 |
| C | 19.76193917551150 | 9.18110093257943  | 22.48617252160903 |
| C | 19.75801682646292 | 7.91687784449158  | 21.69444721166310 |
| N | 20.08780362124006 | 7.88307289084095  | 20.36647574199668 |
| C | 19.40640173465118 | 6.63298015546020  | 22.02102631962107 |
| C | 19.92707196598776 | 6.61807889232644  | 19.94698123487338 |
| N | 19.52136909286953 | 5.84070975539438  | 20.92310687871862 |

|   |                   |                   |                   |
|---|-------------------|-------------------|-------------------|
| N | 17.73917883823498 | 8.48833890975887  | 24.63892606153900 |
| C | 17.06455778382359 | 7.52462968959855  | 25.48142559394733 |
| C | 17.93289433453141 | 7.13765860511902  | 26.67304698241878 |
| C | 19.14725124490529 | 6.30263218966833  | 26.26342800794226 |
| C | 18.70610572841176 | 4.87762243039617  | 25.82492372434747 |
| O | 18.37952754937698 | 4.74016490739909  | 24.62327381129254 |
| O | 18.70411137056273 | 3.98609496511160  | 26.69338133464831 |
| C | 14.42001855010252 | 10.39744142751027 | 20.97902601758705 |
| C | 13.39667779333118 | 9.50291739627077  | 21.62824521796722 |
| O | 12.18551850829001 | 9.65185259680448  | 21.49485015699462 |
| N | 13.92947712197882 | 8.52388839785160  | 22.38011886962385 |
| C | 13.12136873535577 | 7.66210662604987  | 23.20504454254498 |
| C | 12.76710377014387 | 8.30911648411822  | 24.55454016262280 |
| O | 11.80519985223348 | 7.91708552826253  | 25.20494298140944 |
| C | 13.83149290344420 | 6.32918386340055  | 23.50529590049139 |
| C | 14.54911859709055 | 5.75678068869884  | 22.33327964797141 |
| N | 14.05210366791114 | 5.75059753188324  | 21.05719295887155 |
| C | 15.77344753703169 | 5.15078060689703  | 22.24711369917312 |
| C | 14.97585883207709 | 5.16529527033189  | 20.26742653119354 |
| N | 16.01976117915980 | 4.79076920989861  | 20.96111565453898 |
| N | 13.60258229517308 | 9.26718450941189  | 24.96363039218596 |
| C | 13.42739627377784 | 9.99202024776253  | 26.20054419239757 |
| C | 12.05177002359698 | 4.95235024254388  | 16.29245314160737 |
| C | 13.50065670916746 | 5.37288232225881  | 16.24491751787162 |
| O | 14.08249426372678 | 5.88864855544020  | 17.18990063262303 |
| N | 14.11255388993900 | 5.10577557280453  | 15.07365696322556 |
| C | 15.44178490417651 | 5.57143295490816  | 14.75726168496652 |
| C | 15.40927168773792 | 6.24445822976895  | 13.37866480721582 |
| O | 14.44185357258173 | 6.11456752962546  | 12.63613861944564 |
| C | 16.45806459524632 | 4.40647128719922  | 14.75993066871993 |
| C | 16.59062733371258 | 3.84395009935438  | 16.12896699883634 |
| N | 15.81721098911312 | 2.82272571105863  | 16.61386678847711 |
| C | 17.39804293583664 | 4.21276913437893  | 17.17047008458409 |
| C | 16.18170873395833 | 2.61615648688512  | 17.89676014591813 |
| N | 17.13476109551328 | 3.43638612481681  | 18.25294199199882 |
| N | 16.50155026292726 | 6.94889474465882  | 13.09097422589992 |
| C | 16.69748967792658 | 7.62079690525280  | 11.82600414992203 |
| C | 23.03752248318531 | 11.03216523575751 | 13.78560525975259 |

|    |                   |                   |                   |
|----|-------------------|-------------------|-------------------|
| C  | 22.47618851720556 | 10.76619921606050 | 15.15816264774270 |
| O  | 22.67966276566237 | 9.73589433288380  | 15.78733844998212 |
| N  | 21.68717815953405 | 11.74720932326883 | 15.64044256477364 |
| C  | 21.19126860060146 | 11.71989736421421 | 17.00526384031209 |
| C  | 20.59331537355572 | 10.34206178010619 | 17.29762924869305 |
| O  | 20.84927514882936 | 9.73550185514677  | 18.32420270222761 |
| C  | 20.15327093576527 | 12.83344872158401 | 17.24513806885183 |
| C  | 20.81723758031086 | 14.21741962974905 | 17.16516600906260 |
| C  | 19.49127865412952 | 12.64395665159157 | 18.60954627763692 |
| C  | 19.80835745993533 | 15.33790659307257 | 16.93460350788829 |
| N  | 19.74095263606895 | 9.89634028955514  | 16.35701780589859 |
| C  | 19.02163628241457 | 8.64950047311287  | 16.46368929675771 |
| C  | 19.53154584468526 | 7.56924881410162  | 15.50143051665250 |
| O  | 18.76354495815812 | 6.82450241141741  | 14.90147393685416 |
| C  | 17.51009292212639 | 8.83315579114450  | 16.31804192974025 |
| C  | 16.91331662372369 | 9.76335914997123  | 17.36274634433481 |
| S  | 17.41064519519089 | 9.36076931184514  | 19.07704508021972 |
| C  | 16.69468941761468 | 7.71695666912748  | 19.29046682148933 |
| N  | 20.86216657456202 | 7.50434873356675  | 15.36004487189916 |
| C  | 21.47418826444442 | 6.24101446583182  | 14.99102282673603 |
| C  | 20.99684681594214 | 5.20984929477374  | 16.03894825546162 |
| O  | 20.37396508375233 | 5.59440326417224  | 17.02412842170700 |
| C  | 22.98637684088697 | 6.40990351540004  | 14.96504209942845 |
| N  | 21.27911942120146 | 3.91879961945746  | 15.85122488711004 |
| C  | 20.73294451353421 | 2.92283357038627  | 16.77512069794974 |
| C  | 21.08848888897668 | 3.14551386112990  | 18.24510222360472 |
| O  | 20.34850222453103 | 2.74005232565435  | 19.13373997497679 |
| C  | 21.28120215643532 | 1.59343747336208  | 16.24665546007984 |
| C  | 21.39983352750338 | 1.85157088755454  | 14.74703745605951 |
| C  | 21.91090309777408 | 3.29005507751047  | 14.70052778458697 |
| N  | 22.28633686682943 | 3.70734068298073  | 18.46993954816652 |
| C  | 22.75383615854633 | 4.06612805639975  | 19.78816752086890 |
| Zn | 18.30308907013956 | 3.73510304000337  | 20.52418572870170 |
| O  | 18.31989794305403 | 2.62583856904904  | 22.93288290041980 |
| H  | 16.34806990324296 | 13.06412629971772 | 25.02857125202364 |
| H  | 17.32923077435317 | 6.55269162729144  | 27.37067862797820 |
| H  | 18.26236055238710 | 8.04302057756120  | 27.19163111123775 |
| H  | 19.82462707223041 | 6.19130342554258  | 27.11164417572803 |

|   |                   |                   |                   |
|---|-------------------|-------------------|-------------------|
| H | 19.67320838059162 | 6.77300462412616  | 25.43073590678689 |
| H | 16.85370280103967 | 6.64143638441083  | 24.87237962706420 |
| H | 15.12768937293390 | 9.80797103640656  | 20.40550035734414 |
| H | 13.92621937297647 | 11.12123631853607 | 20.33885177666745 |
| H | 12.57999047309116 | 9.55763988330241  | 26.72798186149208 |
| H | 15.81664371830707 | 7.44956117652646  | 11.20981607525227 |
| H | 22.23392941196863 | 11.22928573602421 | 13.08074153304667 |
| H | 19.38789621505351 | 12.76062135895528 | 16.46527099957990 |
| H | 18.76865890813489 | 13.43369453181477 | 18.78996089107836 |
| H | 18.97314271178526 | 11.69039187659040 | 18.68058315075303 |
| H | 20.24328503231465 | 12.67598719785113 | 19.39407968317835 |
| H | 21.54729602853521 | 14.24454003334755 | 16.35432445911953 |
| H | 21.36035558869796 | 14.40142185020082 | 18.09354876091222 |
| H | 20.32143590413172 | 16.29415710787532 | 16.87187243374272 |
| H | 19.26330734298524 | 15.18116051494263 | 16.00651694432797 |
| H | 19.08972560620255 | 15.39455811623435 | 17.74705604064791 |
| H | 22.02586109191365 | 11.84578591263010 | 17.70954163587208 |
| H | 17.05604979945285 | 7.84494762807306  | 16.40804719405570 |
| H | 17.27547146923627 | 9.22177173322336  | 15.32444014570694 |
| H | 15.82457656723452 | 9.73211471327834  | 17.32122619974762 |
| H | 17.24624994576489 | 10.78975530005087 | 17.22062453851410 |
| H | 16.66880143980951 | 7.52325209355020  | 20.35956174245897 |
| H | 15.68796679816279 | 7.70133491741175  | 18.88224195454372 |
| H | 17.31184860564266 | 6.96255570561939  | 18.80979383515231 |
| H | 19.23598430410076 | 8.26084569100627  | 17.46914000873943 |
| H | 23.48004355969503 | 5.50555372658852  | 14.62858864995518 |
| H | 23.34752810533162 | 6.67265979438363  | 15.95680929816948 |
| H | 21.08706623547847 | 5.94626147287374  | 14.00877402352323 |
| H | 20.62096194081931 | 0.76699484149657  | 16.49265641501557 |
| H | 22.26240129916268 | 1.39798228600446  | 16.68019551333511 |
| H | 20.41870039005900 | 1.78450924830516  | 14.27887198661463 |
| H | 22.07757315273357 | 1.15912511126472  | 14.25553784689944 |
| H | 22.99895292019764 | 3.30452197758887  | 14.81839833010869 |
| H | 21.64163263314982 | 3.80061047843590  | 13.77664108404235 |
| H | 19.63750682435626 | 2.94533348934828  | 16.72767227986674 |
| H | 23.70047801802864 | 3.56851320776391  | 20.00026152670246 |
| H | 22.00311965034368 | 3.74720052960518  | 20.50887161048158 |
| H | 17.89138599264450 | 9.86380425775580  | 21.64346998895437 |

|   |                   |                   |                   |
|---|-------------------|-------------------|-------------------|
| H | 20.19391834249822 | 8.99549710179267  | 23.47119398410220 |
| H | 20.36299205189321 | 9.92596324603734  | 21.96225734461825 |
| H | 19.08655281037426 | 6.22321682070360  | 22.95880389457595 |
| H | 20.12319525357984 | 6.28131314709336  | 18.95021908403828 |
| H | 12.16847131228321 | 7.48718391350664  | 22.68883857603960 |
| H | 13.08292214767750 | 5.62892285235696  | 23.88621535253587 |
| H | 14.56944710338812 | 6.48153017013256  | 24.29415659079810 |
| H | 16.48529404230023 | 4.95224904639935  | 23.02198340500246 |
| H | 14.85919771446340 | 5.05665061356587  | 19.20836470665170 |
| H | 15.73681391893023 | 6.29454708167988  | 15.52435829752817 |
| H | 17.42631533000101 | 4.79783502498308  | 14.45030956166969 |
| H | 16.12714147364488 | 3.64216930875516  | 14.05551216567471 |
| H | 18.15661553516660 | 4.96812359832931  | 17.20017053251820 |
| H | 15.74812004448432 | 1.87298558728420  | 18.53341382353694 |
| H | 19.09836339045060 | 2.11417403362018  | 23.16634221369531 |
| H | 17.47790092099675 | 13.54341521999835 | 23.75453763715159 |
| H | 18.09247094621137 | 12.81981168961153 | 25.24655987949714 |
| H | 11.45079673590551 | 5.70911734402685  | 15.79186820885699 |
| H | 11.72435021206079 | 4.87986627925108  | 17.32535724870985 |
| H | 16.82449728289264 | 8.69175568850032  | 11.98430099563090 |
| H | 17.57806663058437 | 7.22369969462725  | 11.32186456576042 |
| H | 11.90377091499049 | 4.00212045158153  | 15.78927550020334 |
| H | 14.32527570491537 | 9.90563860794174  | 26.81250409920505 |
| H | 13.22942891943026 | 11.04429282722498 | 25.99566891446448 |
| H | 14.96883251564953 | 10.91227860836875 | 21.76422440250667 |
| H | 23.69423235301396 | 11.89836439879389 | 13.81735830616648 |
| H | 23.60694552228698 | 10.16967801533080 | 13.45282639803780 |
| H | 14.36242733871545 | 9.56643575234182  | 24.36498569527119 |
| H | 14.93887201180392 | 8.41731576322444  | 22.45440672096553 |
| H | 18.40589549791438 | 9.09587546117403  | 25.09093930246725 |
| H | 13.55537990819067 | 4.86928187952386  | 14.26092788436907 |
| H | 17.27021111951235 | 6.96587947922629  | 13.75637150028540 |
| H | 19.11301642563519 | 11.54512196018932 | 23.34449130949219 |
| H | 21.44692644977468 | 8.13539533281021  | 15.89796905705731 |
| H | 22.82259071695999 | 4.04892188562850  | 17.68695371144152 |
| H | 21.59416080872681 | 12.60981368659932 | 15.12430805560596 |
| H | 19.58487058839264 | 10.45180755813448 | 15.52924230647668 |
| H | 18.29019366518286 | 3.37300415160390  | 23.57210020014771 |

|   |                   |                  |                   |
|---|-------------------|------------------|-------------------|
| H | 16.11158476504793 | 7.94298433306578 | 25.83125959639653 |
| H | 13.17517950329885 | 6.15008483687416 | 20.76490137695477 |
| H | 20.37248517963989 | 8.66522142687795 | 19.78308709155229 |
| H | 15.10332491644419 | 2.32780975100690 | 16.10259717765978 |
| H | 23.24317361519573 | 7.22084448613698 | 14.28914372253652 |
| H | 22.88208828320859 | 5.14613516860601 | 19.86801353077728 |

**Cluster model of lWNI**

|   |                   |                   |                   |
|---|-------------------|-------------------|-------------------|
| C | 19.10315680980707 | 51.65126718965190 | 7.97501566487862  |
| C | 18.75969344238706 | 50.89864026208609 | 6.71497854879032  |
| O | 19.53200426907849 | 50.76194712666236 | 5.77636451795473  |
| N | 17.50310298801479 | 50.40277313487393 | 6.69262986482049  |
| C | 17.03250590559319 | 49.51810836240438 | 5.64334473446375  |
| C | 17.48665732513315 | 50.01535452611828 | 4.26858951664132  |
| O | 17.94752103628910 | 49.24066081878939 | 3.43802597922306  |
| C | 15.49673849774208 | 49.41568615706325 | 5.68079962784601  |
| C | 14.99378766307909 | 48.49781688595704 | 4.62084965546610  |
| N | 14.79624518847524 | 47.15928395749898 | 4.82764025114549  |
| C | 14.67169506459790 | 48.72044130831469 | 3.30894592696335  |
| C | 14.36793309506292 | 46.63408114435470 | 3.66934420038911  |
| N | 14.28150948657263 | 47.55257703426371 | 2.73529425258373  |
| N | 17.28049014054053 | 51.31039621270687 | 4.03277303673472  |
| C | 17.67999400273591 | 51.95215161977511 | 2.79897831521382  |
| C | 16.89881164871214 | 53.23618335499341 | 2.55153863441162  |
| C | 15.40378890684841 | 52.98555814100885 | 2.39759432176434  |
| C | 15.05214895991653 | 52.09296152853607 | 1.17791682525436  |
| O | 13.99087985851892 | 51.42963112436458 | 1.29134283368737  |
| O | 15.80446324436346 | 52.09715576222172 | 0.18923287457798  |
| C | 21.01671980937159 | 48.04723838978279 | 4.71712461806456  |
| C | 21.44199304233193 | 48.11455011713167 | 3.27426195977498  |
| O | 22.52478703738863 | 47.70379299949239 | 2.86836879366374  |
| N | 20.54253449649014 | 48.69125013700808 | 2.45401592953146  |
| C | 20.79986123828252 | 48.81725058980271 | 1.03680883557395  |
| C | 22.01285696142385 | 49.71936058199613 | 0.75458712634467  |
| O | 22.71614215132207 | 49.54529916147040 | -0.23031451548347 |
| C | 19.59638581832073 | 49.41180729454665 | 0.30013377955293  |
| C | 18.35368427424798 | 48.59391555220524 | 0.41547540405410  |

|   |                   |                   |                   |
|---|-------------------|-------------------|-------------------|
| N | 18.33536297869610 | 47.26953222270537 | 0.74364471113649  |
| C | 17.04584133381483 | 48.92703540304987 | 0.17397253432433  |
| C | 17.05696220509017 | 46.86243300669356 | 0.70139626481451  |
| N | 16.25375533660770 | 47.83544107332133 | 0.34961547550352  |
| N | 22.16036056479210 | 50.73175490351793 | 1.61464576471041  |
| C | 23.24189862197005 | 51.68672807258901 | 1.54714253612225  |
| C | 20.63446576230130 | 44.55693769650781 | -1.04787113309364 |
| C | 19.68936229560668 | 44.19298690724937 | 0.06837659591868  |
| O | 19.62153770519002 | 44.82538753878963 | 1.11799053219301  |
| N | 18.87052905668815 | 43.15958358903318 | -0.20845776943345 |
| C | 18.04279216913404 | 42.53173782824886 | 0.79792777654868  |
| C | 18.74782609365171 | 41.25001286269736 | 1.28456503798848  |
| O | 19.68956920607912 | 40.77635963428475 | 0.65931854303167  |
| C | 16.64885296282934 | 42.17924493586261 | 0.23995320329271  |
| C | 15.90565929621479 | 43.38164109070786 | -0.22503215771048 |
| N | 16.08453961378501 | 43.94502146681226 | -1.46127713458092 |
| C | 14.96075419266808 | 44.15692213904818 | 0.39186589720171  |
| C | 15.26380361881680 | 45.01019603432504 | -1.54406614624354 |
| N | 14.57135917646849 | 45.16050678032980 | -0.44256603312186 |
| N | 18.23680923901926 | 40.73117706603501 | 2.39905078446552  |
| C | 18.72220318284942 | 39.50721720053404 | 2.99566601710720  |
| C | 12.95334757633367 | 40.79390130841017 | 9.06250344141732  |
| C | 13.44936737535308 | 42.12057404707917 | 8.55756563201311  |
| O | 13.00394379019457 | 42.66477918779341 | 7.54612615021862  |
| N | 14.45783099344675 | 42.65737913443763 | 9.25984495881420  |
| C | 14.94921705322388 | 44.00580154123844 | 9.02827092279881  |
| C | 15.19480720414692 | 44.23538398943715 | 7.53560115488628  |
| O | 14.81441365574031 | 45.24788891511153 | 6.97481752119996  |
| C | 16.23297657810715 | 44.26778063909581 | 9.84198878089517  |
| C | 15.92501010502685 | 44.28527680116904 | 11.34807693288294 |
| C | 16.85930409830859 | 45.59612343417471 | 9.41913216794636  |
| C | 17.16885010531621 | 44.05573533605960 | 12.20058141028917 |
| N | 15.89223740783245 | 43.26069516012225 | 6.92044148422810  |
| C | 16.26850350136549 | 43.33114026660502 | 5.52839282166398  |
| C | 15.48812291102117 | 42.36371260624637 | 4.63314806499155  |
| O | 15.92915264091893 | 41.99810004611463 | 3.55031563419626  |
| C | 17.77516287847373 | 43.15121339479815 | 5.32322508603219  |
| C | 18.60934844635990 | 44.25109532928575 | 5.96369331321838  |

|    |                   |                   |                   |
|----|-------------------|-------------------|-------------------|
| S  | 17.99328578528414 | 45.93898166113750 | 5.61722051885994  |
| C  | 18.00012396558450 | 45.96269523610250 | 3.81014676027823  |
| N  | 14.32666090360933 | 41.92395927010794 | 5.13504946222997  |
| C  | 13.34292160882185 | 41.33501910842193 | 4.25101498826172  |
| C  | 12.78723509859704 | 42.46452391829993 | 3.35487211852422  |
| O  | 13.24996234472918 | 43.59084807380933 | 3.41640739270544  |
| C  | 12.22082865662675 | 40.67553357519324 | 5.07242884709704  |
| O  | 11.29483060588916 | 41.60938049427421 | 5.56833212864356  |
| N  | 11.78206836610948 | 42.10346425956691 | 2.55036950312784  |
| C  | 11.02658600746933 | 43.04259628518528 | 1.74907339252815  |
| C  | 9.60379678564096  | 43.26259641518141 | 2.30196051655901  |
| O  | 8.73477522520879  | 43.76695806453959 | 1.60334660387371  |
| C  | 10.96954489043142 | 42.58963739272033 | 0.29381185196601  |
| N  | 9.40176511173573  | 42.86493091952460 | 3.56283662712165  |
| C  | 8.13984401327915  | 43.04220541476973 | 4.24517786025257  |
| Zn | 13.94560148907443 | 47.44539495141234 | 0.40598697558052  |
| O  | 13.69503682536723 | 49.69818602227877 | -0.68890265144616 |
| H  | 20.05999760089692 | 52.14858737593835 | 7.84737728917746  |
| H  | 15.06279405866609 | 50.40491770503177 | 5.52677313291895  |
| H  | 15.19312338254638 | 49.03519046177199 | 6.65762627012055  |
| H  | 14.67369501959490 | 49.63569818356434 | 2.75132126799159  |
| H  | 14.09980578947449 | 45.60523806003730 | 3.53967268903400  |
| H  | 17.46462652454030 | 48.51497658203642 | 5.77331925661786  |
| H  | 17.26943363351296 | 53.67704326334754 | 1.62480249834134  |
| H  | 17.07596938222015 | 53.94149428582605 | 3.36727067929251  |
| H  | 14.88067794473577 | 53.93320130327587 | 2.24371067804531  |
| H  | 14.97662335585389 | 52.50718152374304 | 3.28077705550947  |
| H  | 17.49761789748429 | 51.24697527674317 | 1.98369919671012  |
| H  | 20.20194188587266 | 47.33799254991259 | 4.82761742569755  |
| H  | 21.85563798302545 | 47.73084008474422 | 5.32909465763530  |
| H  | 23.78597379379348 | 51.50496369617240 | 0.62236855832978  |
| H  | 20.07290234168231 | 44.92154745077516 | -1.90486304539240 |
| H  | 19.52248022138083 | 39.11706078775619 | 2.36929839513375  |
| H  | 12.66114778400836 | 40.87399422042461 | 10.10655419131762 |
| H  | 16.94104073903522 | 43.45899340205988 | 9.63270933480319  |
| H  | 17.75030748429871 | 45.79486927753725 | 10.00660325934595 |
| H  | 17.14032115164893 | 45.59841954808125 | 8.36867434321972  |
| H  | 16.15318550720801 | 46.40775215645682 | 9.57666405542816  |

|   |                   |                   |                   |
|---|-------------------|-------------------|-------------------|
| H | 15.19290386909993 | 43.51615295135215 | 11.60028289478696 |
| H | 15.48031331056523 | 45.24808301115063 | 11.60482581933404 |
| H | 16.90510742026295 | 44.06728882076656 | 13.25502746742077 |
| H | 17.62178632346872 | 43.09358204192641 | 11.97238163573482 |
| H | 17.91066481381807 | 44.83098685111265 | 12.03160493814686 |
| H | 14.18179625297343 | 44.73552845059476 | 9.32190955343877  |
| H | 17.95960700057551 | 43.13295857364380 | 4.24827044703998  |
| H | 18.09035537931085 | 42.18892833060244 | 5.73226224749958  |
| H | 19.64008066098124 | 44.19739218283892 | 5.61303562331228  |
| H | 18.59910131546455 | 44.18235821029694 | 7.04987117915825  |
| H | 17.87080660397775 | 47.00080223739217 | 3.51591263325400  |
| H | 18.94778974831405 | 45.58476918496682 | 3.43625787886610  |
| H | 17.17132472916134 | 45.37473317140289 | 3.42498963614999  |
| H | 15.97536478420047 | 44.33608342627187 | 5.19324270298153  |
| H | 12.67826040717076 | 40.10277976219921 | 5.88695989200620  |
| H | 11.65137077485796 | 39.98652129331197 | 4.44511867382496  |
| H | 11.71743651246821 | 42.12704502465327 | 6.28022871864113  |
| H | 13.85187433971774 | 40.59706082909911 | 3.62228741385481  |
| H | 11.96534974606573 | 42.59032786631150 | -0.13908159973483 |
| H | 10.33899908518434 | 43.27693987342696 | -0.26201931976899 |
| H | 11.54077008584225 | 44.00977771159582 | 1.81092752880265  |
| H | 7.40699010887170  | 43.39255450305539 | 3.52060841571877  |
| H | 21.05891529193570 | 47.83436283768495 | 0.61764315082332  |
| H | 19.86953629847407 | 49.51507840664938 | -0.75470190531963 |
| H | 19.39136603905377 | 50.41430610025132 | 0.68178573377998  |
| H | 19.11610482568138 | 46.67641945662426 | 1.00105477316022  |
| H | 16.64063214860451 | 49.88311389655449 | -0.09485337868145 |
| H | 16.74970422089094 | 45.86458441689552 | 0.93402723625992  |
| H | 17.94468787499776 | 43.23954906539966 | 1.62597223889286  |
| H | 16.07638940071919 | 41.71235324061933 | 1.04040041637503  |
| H | 16.76767695492510 | 41.46838883157159 | -0.58001266847818 |
| H | 14.53291682255282 | 44.05131063903295 | 1.36808565149470  |
| H | 15.18303816574086 | 45.64260025645558 | -2.40373630562027 |
| H | 13.75357622473054 | 50.35061048719114 | 0.06029947991727  |
| H | 14.38415496980960 | 49.96531817898358 | -1.30238398535139 |
| H | 22.84054387309585 | 52.69969808294539 | 1.54510410275442  |
| H | 23.91690684349177 | 51.56144453013022 | 2.39446492582822  |
| H | 20.65775686569754 | 49.01959874798443 | 5.04556523132721  |

|   |                   |                   |                   |
|---|-------------------|-------------------|-------------------|
| H | 19.17696217066388 | 50.95149059578139 | 8.80421743566625  |
| H | 18.33650012447863 | 52.38689674290826 | 8.20172288667603  |
| H | 18.75484702987524 | 52.17269292547873 | 2.83635931669633  |
| H | 17.91666961153216 | 38.77621803177231 | 3.05630997496171  |
| H | 19.11121658744103 | 39.70263161667539 | 3.99503787628277  |
| H | 21.21318437859896 | 43.68754557981894 | -1.34890319122187 |
| H | 21.31365347624877 | 45.33765590469136 | -0.71438403886678 |
| H | 13.74007037207379 | 40.04688559360981 | 8.98002994558413  |
| H | 12.09429347280099 | 40.47478890793501 | 8.47875096722179  |
| H | 10.53928594856186 | 41.59329986270892 | 0.22383337835706  |
| H | 21.56365428294454 | 50.75745545803738 | 2.42888509855960  |
| H | 19.62111801602355 | 48.94744073137168 | 2.80111646412611  |
| H | 16.94345139266837 | 50.44814354831650 | 7.53198779913635  |
| H | 16.96158156943978 | 51.91155383787464 | 4.77722368149945  |
| H | 10.16323852122177 | 42.50976712613715 | 4.13153432526719  |
| H | 11.47911390597280 | 41.14150106101897 | 2.51749417784689  |
| H | 14.76655021341708 | 42.19525915230773 | 10.10392231114982 |
| H | 16.19567157761627 | 42.45396758809105 | 7.44542112190791  |
| H | 13.94239393912451 | 42.41041704001830 | 5.94280476249187  |
| H | 17.43961651672875 | 41.18317857938101 | 2.83836464496308  |
| H | 19.12696768752392 | 42.55420401104670 | -0.97736557243567 |
| H | 14.91086425186473 | 46.64737924888825 | 5.69808291158306  |
| H | 16.71320326151144 | 43.61232620313623 | -2.17556863405208 |
| H | 8.23728705540362  | 43.77900857404601 | 5.04323618406228  |
| H | 7.81614547294606  | 42.09265955347045 | 4.66924388795947  |

**Cluster model of 2DW2**

|   |                   |                  |                   |
|---|-------------------|------------------|-------------------|
| C | 83.46072709397421 | 3.37260556819164 | 28.08165232687860 |
| C | 82.47756349922139 | 4.36788376032041 | 27.52195872132137 |
| O | 81.56081832228752 | 4.86042456818814 | 28.17096738767151 |
| N | 82.66829239193068 | 4.66655818625488 | 26.21479380341597 |
| C | 81.88878441367535 | 5.69450938783705 | 25.55058407379212 |
| C | 80.40735004297034 | 5.52523836148405 | 25.89937387496801 |
| O | 79.72234884226823 | 6.47135531720054 | 26.27692690607115 |
| C | 82.10998691871767 | 5.61525069253102 | 24.02983643550334 |
| C | 81.33723623490197 | 6.65022858309826 | 23.28538493026167 |
| N | 81.92474686753719 | 7.49678792292121 | 22.38459047380622 |

|   |                   |                   |                   |
|---|-------------------|-------------------|-------------------|
| C | 80.01377146372363 | 6.98545382408404  | 23.29309334340933 |
| C | 80.97458419967165 | 8.30435618788838  | 21.89425019039137 |
| N | 79.79555477568593 | 8.02049425489603  | 22.43089576483608 |
| N | 79.91702707391909 | 4.30004075128372  | 25.68009268860160 |
| C | 78.52255150616557 | 3.95956749767834  | 25.85049493514694 |
| C | 78.03094404665627 | 3.01302999458793  | 24.75668332149110 |
| C | 78.23954243079096 | 3.54816437477093  | 23.34284629113905 |
| C | 77.45839867266058 | 4.82997094589485  | 22.99915908758913 |
| O | 76.68620472325932 | 5.34172071621439  | 23.82128397220434 |
| O | 77.68464976795964 | 5.29364639721126  | 21.84243608875380 |
| C | 81.83561006480080 | 8.15361952974296  | 28.71642046866007 |
| C | 80.49831881615428 | 8.64942489743878  | 29.20058629690353 |
| O | 80.36651546817961 | 9.41718351120241  | 30.14946659066689 |
| N | 79.44697945994882 | 8.17960259590695  | 28.50258641542069 |
| C | 78.09138696575930 | 8.42899276860925  | 28.93390963763496 |
| C | 77.72455026384326 | 7.61452474191337  | 30.18744042163182 |
| O | 76.88226328871338 | 8.01626811270465  | 30.97970776405665 |
| C | 77.07263505853297 | 8.07397405157858  | 27.84085478726915 |
| C | 77.32898609511460 | 8.74695154387787  | 26.53991591878140 |
| N | 77.61317858657037 | 10.08115110357609 | 26.39771688516107 |
| C | 77.32529186201654 | 8.23542312461357  | 25.27585415002267 |
| C | 77.78266760644652 | 10.33461884331669 | 25.08503091491812 |
| N | 77.60845684179992 | 9.22401360431156  | 24.37552918258436 |
| N | 78.34495776411484 | 6.43431184809035  | 30.28566901792878 |
| C | 78.14920145142935 | 5.52094698441638  | 31.38706528697382 |
| C | 77.44904814803579 | 15.20948142515167 | 24.67688781668246 |
| C | 78.41861463341219 | 14.37787187254471 | 23.87134370762023 |
| O | 78.78430955911500 | 13.25795301928228 | 24.20853297073832 |
| N | 78.81992952348146 | 14.96175030044492 | 22.72587758380868 |
| C | 79.83972613493496 | 14.41416776747209 | 21.86856728343559 |
| C | 80.84397689490019 | 15.50970459478907 | 21.51367140782191 |
| O | 80.57048054390349 | 16.70365894830940 | 21.63663405685838 |
| C | 79.22915781455265 | 13.83699922484422 | 20.56297645118952 |
| C | 78.47338256952696 | 12.59517309219084 | 20.85252245159566 |
| N | 77.10372451077359 | 12.47759538082895 | 20.81366974468639 |
| C | 78.93908380445704 | 11.38929984095844 | 21.29184005678901 |
| C | 76.78873389656481 | 11.22516117435454 | 21.22300400494462 |
| N | 77.89591822597662 | 10.54248649565761 | 21.51856016990919 |

|    |                   |                   |                   |
|----|-------------------|-------------------|-------------------|
| N  | 81.98903278074536 | 15.03071332548492 | 21.01038917557549 |
| C  | 83.09241836478775 | 15.87808570028431 | 20.62207588993613 |
| C  | 88.58203448066692 | 11.36060739550771 | 20.51222532613730 |
| C  | 87.55266969593080 | 10.32816541431284 | 20.89507664529819 |
| O  | 86.63739813713210 | 9.95468656371936  | 20.15680410384710 |
| N  | 87.67623413781041 | 9.85996863326923  | 22.16369132711164 |
| C  | 86.89524964121023 | 8.72990782598705  | 22.62859725613909 |
| C  | 85.40545590637967 | 9.02530381501272  | 22.45176739707925 |
| O  | 84.61846777935577 | 8.14236552954960  | 22.11558220355803 |
| C  | 87.24088038944629 | 8.39012946764379  | 24.09427606083892 |
| C  | 88.52646953187285 | 7.55445254927146  | 24.20225384156765 |
| C  | 86.10711079955963 | 7.60451673315885  | 24.75579598468078 |
| C  | 89.80135054878913 | 8.21579555835986  | 23.68868429937442 |
| N  | 85.04032427256857 | 10.28843749662919 | 22.75043204833096 |
| C  | 83.68186334517900 | 10.77073466829034 | 22.72511718173948 |
| C  | 83.32215378103051 | 11.58297448020685 | 21.48513788855599 |
| O  | 82.26856007174646 | 12.25310077634425 | 21.45464537297130 |
| C  | 83.36508531069059 | 11.58966908275848 | 23.98387697210045 |
| C  | 83.54953444630205 | 10.79992956077477 | 25.27027530390418 |
| S  | 82.67763349982005 | 9.19668197694157  | 25.27674464663591 |
| C  | 80.95328893078343 | 9.73581768251761  | 25.37095671803606 |
| N  | 84.19518528158736 | 11.57831981700171 | 20.44123593607139 |
| C  | 83.66204790109487 | 11.94986108919807 | 19.13940174223542 |
| C  | 82.40137360121653 | 11.12345703806616 | 18.87012721312461 |
| O  | 82.21651737867114 | 10.03266265243044 | 19.41834320677376 |
| C  | 84.72317364041113 | 11.73281826631226 | 18.05988065939507 |
| C  | 85.80785099597027 | 12.80681105201627 | 18.10640322147848 |
| C  | 86.88862061180301 | 12.54761727764772 | 17.06410683576174 |
| N  | 81.50087773803989 | 11.64424709920992 | 18.00586370014293 |
| C  | 80.23172086478425 | 10.97220591511260 | 17.78082944248017 |
| C  | 80.33269041646759 | 9.77096296565245  | 16.83255190496046 |
| O  | 79.40762140890064 | 8.97752824532364  | 16.72994150063208 |
| C  | 79.33491404860735 | 12.05254880117941 | 17.16554695014133 |
| C  | 80.33366420000054 | 12.95299033953625 | 16.44232854442457 |
| C  | 81.53902828241223 | 12.95846936278670 | 17.38189911402877 |
| N  | 81.44288649059905 | 9.71773812609655  | 16.08465104712268 |
| C  | 81.73469972834930 | 8.63819609581565  | 15.17012480806714 |
| Zn | 78.04224623609562 | 8.87442202181290  | 22.48305245773347 |

|   |                   |                   |                   |
|---|-------------------|-------------------|-------------------|
| O | 76.65501443943991 | 7.60503696660313  | 21.88646173657425 |
| H | 83.12693889858264 | 3.04947608030610  | 29.06313795986425 |
| H | 76.96470752712608 | 2.84892514679054  | 24.91860842019856 |
| H | 78.54353632881886 | 2.05246764193105  | 24.84877025007798 |
| H | 77.93487858701971 | 2.79552048181303  | 22.61151758088664 |
| H | 79.29163048014584 | 3.77374531806689  | 23.15429192664080 |
| H | 77.95433618265020 | 4.89082701398425  | 25.81505722855249 |
| H | 82.04899687691486 | 8.54878220042181  | 27.72682313851012 |
| H | 82.61206107156767 | 8.47088833021746  | 29.40560555811341 |
| H | 77.37652833437045 | 5.93703871956978  | 32.03097036253096 |
| H | 76.57953936532712 | 15.45886790919368 | 24.07398055141782 |
| H | 82.75904807700124 | 16.91319606937975 | 20.67712162926602 |
| H | 89.58374204377272 | 10.95264971457889 | 20.62942243661160 |
| H | 87.37610633841069 | 9.33337773251581  | 24.63471017119823 |
| H | 86.38789802471412 | 7.33057954391328  | 25.76904567977004 |
| H | 85.18539091945551 | 8.17879897085471  | 24.80281003332024 |
| H | 85.90851874936702 | 6.69786705157167  | 24.18962597017206 |
| H | 88.37418426448176 | 6.61439241139877  | 23.66805860193510 |
| H | 88.66869422165247 | 7.31220909295276  | 25.25719528575221 |
| H | 90.65475891682046 | 7.58533570834158  | 23.92785134790396 |
| H | 89.77873655168364 | 8.34031050072298  | 22.60894611676968 |
| H | 89.95908007827725 | 9.18103260160648  | 24.16623380613276 |
| H | 87.09363357839656 | 7.85103859039567  | 21.99709481390145 |
| H | 82.33532140830576 | 11.94013265271382 | 23.89496899982880 |
| H | 84.01260641802912 | 12.46947191355973 | 24.01673700217723 |
| H | 83.19484486735783 | 11.36980310671217 | 26.12870554258470 |
| H | 84.59559617956572 | 10.53842365075260 | 25.42263127350424 |
| H | 80.35835890791257 | 8.83644987382927  | 25.50391930107020 |
| H | 80.66800523815796 | 10.23860070068949 | 24.45068723514717 |
| H | 80.83162285867712 | 10.39696074718982 | 26.22438953214025 |
| H | 83.03732140114316 | 9.88123650136275  | 22.71468016326622 |
| H | 84.25286320798580 | 11.73345089074375 | 17.07497911460295 |
| H | 85.17441917988457 | 10.75061222397738 | 18.21511128653113 |
| H | 86.24721413127335 | 12.81230074896755 | 19.10400192022592 |
| H | 85.35851849118619 | 13.78638859005399 | 17.93079590895075 |
| H | 86.46802806350924 | 12.57528366606133 | 16.06167897577764 |
| H | 87.33202551346780 | 11.56609027365681 | 17.21815846482515 |
| H | 83.38159981319592 | 13.00819105403311 | 19.18960901852434 |

|   |                   |                   |                   |
|---|-------------------|-------------------|-------------------|
| H | 78.82419538254742 | 12.59926666764389 | 17.95613172091821 |
| H | 78.59298146630253 | 11.61507913295539 | 16.50171210116911 |
| H | 79.94530137644090 | 13.95382695502069 | 16.27488523993527 |
| H | 80.60428069573879 | 12.51368800186697 | 15.48285730168962 |
| H | 82.47726971763224 | 13.11708998897512 | 16.84870737255898 |
| H | 81.43506811494996 | 13.74099563310383 | 18.14321427403461 |
| H | 79.83386093955785 | 10.58605315154945 | 18.72592471655829 |
| H | 80.83851235727917 | 8.02684198827910  | 15.08160171377791 |
| H | 82.18929390987859 | 6.69112445816776  | 25.90257753993842 |
| H | 81.82543283808695 | 4.62096586259651  | 23.67497560890221 |
| H | 83.16983442202995 | 5.77297577487015  | 23.82112227086876 |
| H | 79.20840089891158 | 6.56019829604315  | 23.85210929373954 |
| H | 81.15897788351538 | 9.03724347131869  | 21.13265357435877 |
| H | 78.00463204760827 | 9.48335331961165  | 29.22556710459079 |
| H | 76.08056427934007 | 8.33576306957775  | 28.21906993342685 |
| H | 77.09671015283197 | 6.99787869484568  | 27.66378951337107 |
| H | 77.11466864879947 | 7.23143866606796  | 24.96360707041569 |
| H | 78.03718444084826 | 11.29573951698542 | 24.68314316346135 |
| H | 80.34529962444230 | 13.60007081895870 | 22.39604688744120 |
| H | 80.06181538193009 | 13.60144228256390 | 19.90124612790316 |
| H | 78.59274423649423 | 14.59100960404097 | 20.09962935003099 |
| H | 79.95926646821367 | 11.10002694326984 | 21.44883013118600 |
| H | 75.79476588719184 | 10.83699004267283 | 21.28695512486131 |
| H | 77.06660779346564 | 6.65165522241930  | 21.77821221545362 |
| H | 75.90793418240700 | 7.44477469935481  | 22.47643097183805 |
| H | 83.55136204646385 | 2.51245508782320  | 27.42407589142611 |
| H | 84.43620968191715 | 3.84412187307840  | 28.18006860921061 |
| H | 78.36892556919558 | 3.49349072036586  | 26.83097562935782 |
| H | 83.50659631559196 | 4.34796725890363  | 25.75238342060145 |
| H | 82.92474310957708 | 7.58439628078354  | 22.18834737004820 |
| H | 77.69756107029426 | 10.75061420741567 | 27.14517221923210 |
| H | 76.45068317291938 | 13.19309885358832 | 20.53819758815256 |
| H | 81.81507761402354 | 7.06812715150476  | 28.65177546092660 |
| H | 79.07266212318459 | 5.40559505227522  | 31.95530668465521 |
| H | 77.83059067301025 | 4.54874320119247  | 31.01174811580633 |
| H | 79.05029204248306 | 6.19342579056793  | 29.60362073098586 |
| H | 79.59285723616594 | 7.54491549390575  | 27.71996387709724 |
| H | 80.54536964504177 | 3.54834037063112  | 25.44110308243048 |

|   |                   |                   |                   |
|---|-------------------|-------------------|-------------------|
| H | 83.94380756467146 | 15.73724908110543 | 21.28938417519169 |
| H | 77.13304057477916 | 14.65352517796227 | 25.55493379935941 |
| H | 77.93052640863745 | 16.13292194904914 | 24.99125443579074 |
| H | 83.39864609606747 | 15.64888587070490 | 19.60070943095398 |
| H | 82.15425228209419 | 14.02465753294088 | 21.08716690083741 |
| H | 78.62335410518163 | 15.94167379253547 | 22.56324530872844 |
| H | 88.43550873039625 | 11.65465996710374 | 19.47780787540259 |
| H | 88.48797367454061 | 12.23756860241660 | 21.14979090318688 |
| H | 87.67125203539972 | 13.29926229290707 | 17.12889469640408 |
| H | 82.19603727308879 | 10.35228870392709 | 16.30313516720745 |
| H | 84.88173302318526 | 10.82797958303764 | 20.41489102068533 |
| H | 85.76604706770864 | 10.96137899384068 | 22.94555757834467 |
| H | 88.48351244019327 | 10.12385522400634 | 22.70594060628132 |
| H | 82.00130068499080 | 9.04289626364881  | 14.19425829925484 |
| H | 82.55293386910434 | 8.02223862645069  | 15.54627626504337 |

**Cluster model of 2ERO**

|   |                   |                   |                   |
|---|-------------------|-------------------|-------------------|
| C | 32.12038347924617 | 14.25953376393721 | 84.88579019973230 |
| C | 32.14376691183537 | 13.89656207693933 | 86.34849718826885 |
| O | 31.95279208256501 | 12.76316470168961 | 86.76742859773381 |
| N | 32.36612868741742 | 14.94254156112849 | 87.17435205713110 |
| C | 32.58892460700387 | 14.77520630941784 | 88.59825440060399 |
| C | 31.59291542099642 | 13.77367626657683 | 89.18775275394459 |
| O | 31.95900507809944 | 12.90438926587176 | 89.97025706259079 |
| C | 32.46236810258166 | 16.12834679493292 | 89.32121785951220 |
| C | 32.72576321055763 | 15.98596847100358 | 90.78024243820917 |
| N | 33.97415693644305 | 16.12201248057126 | 91.32465866177917 |
| C | 31.89571839261689 | 15.68978947587107 | 91.82763123780576 |
| C | 33.86095958657501 | 15.91538735130137 | 92.64489752004975 |
| N | 32.61694374866857 | 15.65457338241930 | 92.97913334888992 |
| N | 30.32012035621919 | 13.96607965425270 | 88.84194208020175 |
| C | 29.25124969254625 | 13.09469559285489 | 89.27912265283294 |
| C | 27.89769444544644 | 13.79234793898691 | 89.23428192433346 |
| C | 27.84028707795964 | 15.00727711028913 | 90.15206309617909 |
| C | 28.04950059271881 | 14.65792556781013 | 91.64900572736560 |
| O | 28.55143126438092 | 15.57622673474850 | 92.34465481500686 |
| O | 27.70645945023659 | 13.53830202787561 | 92.06353530891305 |

|   |                   |                   |                   |
|---|-------------------|-------------------|-------------------|
| C | 34.09523990924662 | 10.70942641300678 | 88.13356072189484 |
| C | 33.40285887069831 | 9.65353849682566  | 88.95285323366397 |
| O | 33.70799079570342 | 8.46524192228482  | 88.92432850732516 |
| N | 32.39016735904472 | 10.11356791880933 | 89.71261633033471 |
| C | 31.62648161372264 | 9.22106673723419  | 90.55540299018028 |
| C | 30.84983601321645 | 8.18135268427773  | 89.73028344209537 |
| O | 30.59805107288231 | 7.07354160594173  | 90.18222720073584 |
| C | 30.61617766173923 | 9.98842077533955  | 91.41257198082927 |
| C | 31.23896805029182 | 11.01187847696683 | 92.30140880676821 |
| N | 32.54768022775117 | 10.99652235306408 | 92.68751912073699 |
| C | 30.68273768009508 | 12.08849173233046 | 92.94208168249033 |
| C | 32.73658026368032 | 12.03752893922265 | 93.51260732036467 |
| N | 31.62803987574769 | 12.71104693548603 | 93.69624675716736 |
| N | 30.41723013723367 | 8.62649633064438  | 88.54640336446936 |
| C | 29.69970531119923 | 7.80616947696500  | 87.59841886377458 |
| C | 34.60403190255214 | 7.94180714623010  | 94.23227325287563 |
| C | 35.26741982464479 | 9.26267094174893  | 93.93714730272470 |
| O | 35.09950220585792 | 9.87323397043260  | 92.88604516456478 |
| N | 36.00056764461981 | 9.75725193792126  | 94.95336844745219 |
| C | 36.87303698378816 | 10.90119756279156 | 94.80179954387543 |
| C | 38.31656015807889 | 10.39914536192855 | 94.59804022592527 |
| O | 38.60075485857506 | 9.22062486089366  | 94.78038856163064 |
| C | 36.80053853063157 | 11.82386756364175 | 96.03419973414881 |
| C | 35.43535462493811 | 12.37727174087449 | 96.24314193642586 |
| N | 34.47988522310406 | 11.77663212510149 | 97.01920212827778 |
| C | 34.84932324057852 | 13.51888947477156 | 95.76669776922662 |
| C | 33.38320656106481 | 12.55776411419424 | 96.98959682739770 |
| N | 33.57744481333106 | 13.62002681284239 | 96.24676895965455 |
| N | 39.18233454616084 | 11.34058079195540 | 94.22838354166338 |
| C | 40.58785565753144 | 11.07693632281995 | 94.01684558597236 |
| C | 41.14675221204249 | 19.22953636396366 | 91.32534930690666 |
| C | 39.84229569659322 | 18.56764533193908 | 90.96756522210147 |
| O | 38.89218842116942 | 18.48497387046084 | 91.73872407730315 |
| N | 39.80925155656364 | 18.01819657086951 | 89.73860599350958 |
| C | 38.58296445017404 | 17.50105283914526 | 89.15730611430128 |
| C | 37.80435167136025 | 16.69612093115638 | 90.19963253027333 |
| O | 36.60687697161330 | 16.85514529278979 | 90.36724907746839 |
| C | 38.86966853398678 | 16.62857840081732 | 87.91804661138049 |

|    |                   |                   |                   |
|----|-------------------|-------------------|-------------------|
| C  | 37.55454096325786 | 16.10233133559350 | 87.34384442369738 |
| C  | 39.61406490314693 | 17.42057228276408 | 86.84184359455304 |
| N  | 38.52727879773528 | 15.75270904893236 | 90.83321348425487 |
| C  | 37.94604083564549 | 14.81577315998507 | 91.76225964531289 |
| C  | 38.37181506739477 | 15.02446735400429 | 93.21957204999400 |
| O  | 38.35949922707198 | 14.09257809139031 | 94.01916682875950 |
| C  | 38.18156994260660 | 13.36417051420942 | 91.33300510223404 |
| C  | 37.56713946180842 | 13.02358242686733 | 89.98375250271475 |
| S  | 35.83234076524177 | 13.57161673697879 | 89.80352552309036 |
| C  | 35.03693587151300 | 12.75450818657785 | 91.20717935712004 |
| N  | 38.77039716691969 | 16.25921273055366 | 93.54742851364661 |
| C  | 38.71159528472666 | 16.66555867422506 | 94.93914584802599 |
| C  | 37.23410826282001 | 16.57264124725332 | 95.36936778298640 |
| O  | 36.37270422648497 | 16.22788955589001 | 94.57453328102015 |
| C  | 39.27996605238155 | 18.06824757062093 | 95.09252988796828 |
| N  | 36.97691109921967 | 16.80734429364113 | 96.66330062310666 |
| C  | 35.59562095125416 | 16.88523950290045 | 97.10075140249806 |
| C  | 34.87506340739452 | 18.01005443946878 | 96.33910917232622 |
| O  | 35.44834890280635 | 19.06360240932948 | 96.09031249880917 |
| N  | 33.60621862556579 | 17.74794549595680 | 96.02040523569606 |
| C  | 32.76923816022061 | 18.67442872528848 | 95.29206062794934 |
| Zn | 31.69023322470520 | 14.68815128489455 | 94.89510192221486 |
| H  | 31.75576242042972 | 13.41362417453053 | 84.31071598066495 |
| H  | 31.45565103759628 | 16.52459938462205 | 89.17953379170633 |
| H  | 33.18872000896073 | 16.82291429599940 | 88.89501136231382 |
| H  | 30.83666388357858 | 15.52668371528653 | 91.83282464482775 |
| H  | 34.67733631080158 | 15.99186876418596 | 93.33369440041733 |
| H  | 33.59278285435556 | 14.36328289474056 | 88.77729772045507 |
| H  | 27.14445766665853 | 13.07549013027486 | 89.56494771540046 |
| H  | 27.66713478190137 | 14.09026849695863 | 88.20849647878379 |
| H  | 26.85758044034018 | 15.48117269396796 | 90.08111663907852 |
| H  | 28.59152692103592 | 15.75354039827708 | 89.88739303021042 |
| H  | 29.47364879609587 | 12.78903197800947 | 90.30469828182726 |
| H  | 34.62794668954798 | 11.39343466870150 | 88.78735089567800 |
| H  | 34.79678050968047 | 10.23956308587928 | 87.45141463244319 |
| H  | 29.46809608040222 | 6.86174672734112  | 88.08703907451670 |
| H  | 33.86484269700509 | 8.06687062211669  | 95.02005899972377 |
| H  | 40.77755212431117 | 10.02992700397911 | 94.24664776348280 |

|   |                   |                   |                   |
|---|-------------------|-------------------|-------------------|
| H | 41.34748122657009 | 20.05078630561419 | 90.64171702133089 |
| H | 39.48748270350767 | 15.77896334274007 | 88.22603196985705 |
| H | 37.75211849755012 | 15.44832748605589 | 86.49893423354943 |
| H | 36.93931692477279 | 16.93101371841983 | 87.00233325495088 |
| H | 36.98750378560978 | 15.54169907768540 | 88.08328992833384 |
| H | 39.66634436259836 | 16.82826603621127 | 85.93219899270615 |
| H | 40.63357008390361 | 17.65889339214739 | 87.13350472251044 |
| H | 39.08671196652451 | 18.34423304006227 | 86.61598371646292 |
| H | 37.92837828467664 | 18.33427193999536 | 88.86279587221802 |
| H | 37.75292191674004 | 12.71979401073425 | 92.10108428412533 |
| H | 39.25438448951145 | 13.16435090548586 | 91.28933434921262 |
| H | 37.59197181988163 | 11.94632059713998 | 89.81746352201080 |
| H | 38.08698394161593 | 13.52294038820107 | 89.16820138281209 |
| H | 35.33732300835280 | 11.71122791364389 | 91.24996372302040 |
| H | 36.86699422354821 | 15.02507857733371 | 91.75276834213494 |
| H | 39.23942673115877 | 18.39803291555698 | 96.12560844142830 |
| H | 40.31534343460178 | 18.07875885475822 | 94.76313888106887 |
| H | 38.70892219502885 | 18.76474321659562 | 94.48233157762205 |
| H | 39.28009164163270 | 15.93825100109753 | 95.53114282962127 |
| H | 35.57713790028783 | 17.10732086007143 | 98.16708372220137 |
| H | 35.10264992535888 | 15.92988104113471 | 96.91009062924263 |
| H | 33.34314516513621 | 19.58095966136329 | 95.10968906151054 |
| H | 32.30905924484976 | 8.64123770805702  | 91.19306402117185 |
| H | 30.06945210149784 | 9.25860091215523  | 92.01771847600125 |
| H | 29.88894199893335 | 10.48409358734333 | 90.76623294015734 |
| H | 29.67362631611588 | 12.44812837785612 | 92.88867886897521 |
| H | 33.68278948089373 | 12.27311385517283 | 93.95210023915271 |
| H | 36.54364672943422 | 11.44287545837514 | 93.91003210824923 |
| H | 37.48499448503949 | 12.65615621513440 | 95.87085373136983 |
| H | 37.12036137979982 | 11.26351260376939 | 96.91433742884769 |
| H | 35.26750546776491 | 14.26921954360274 | 95.12715140092092 |
| H | 32.47675943120782 | 12.34312656380366 | 97.51625838121846 |
| H | 33.28273513041333 | 10.36367707115644 | 92.39391597192132 |
| H | 34.58699872508650 | 10.91161845151870 | 97.52585403699960 |
| H | 34.83330848328301 | 16.35998512171473 | 90.83628627977528 |
| H | 32.20311281461093 | 11.11183079766678 | 89.77164071561901 |
| H | 30.72730951740812 | 9.53621839576309  | 88.23604950528076 |
| H | 33.36027564994278 | 11.28637408196188 | 87.57729360100430 |

|   |                   |                   |                   |
|---|-------------------|-------------------|-------------------|
| H | 28.77666931154065 | 8.30395022975747  | 87.30291731975541 |
| H | 30.31221724687698 | 7.61618390280907  | 86.71626965267413 |
| H | 35.28989913348148 | 13.26983405714461 | 92.13010927564676 |
| H | 33.96622872727589 | 12.82568371266645 | 91.03522107641778 |
| H | 32.63187897194351 | 15.83156049500074 | 86.77583547001598 |
| H | 30.09115133336730 | 14.65076966239000 | 88.13754484947317 |
| H | 31.48168100157254 | 15.12149329653289 | 84.71481944780290 |
| H | 29.22852677265287 | 12.19937179061012 | 88.64402916380448 |
| H | 36.27035945416978 | 9.11694838671823  | 95.68824711771893 |
| H | 38.87167755747294 | 12.30356310662210 | 94.12408088741356 |
| H | 41.18812892198050 | 11.71011014306218 | 94.66909108066903 |
| H | 40.85595765933358 | 11.27088044039631 | 92.97800897980140 |
| H | 35.34409711652822 | 7.21380464257831  | 94.55412453763570 |
| H | 34.10813126901989 | 7.57263797071292  | 93.33809230694834 |
| H | 38.62670188600435 | 17.01397163511297 | 92.87913382514260 |
| H | 37.68328920835397 | 17.23514178031985 | 97.24046500509088 |
| H | 33.21915641198117 | 16.81786244020840 | 96.15372187176480 |
| H | 39.51872283206907 | 15.68570339587857 | 90.65928228426056 |
| H | 40.56846842349529 | 18.20558141093337 | 89.10008294670178 |
| O | 29.19599726556785 | 14.77965443126446 | 94.78304012710394 |
| H | 28.73291477703378 | 13.94138863706307 | 94.85313559056328 |
| H | 28.95380811847350 | 15.13083011821842 | 93.88374975938939 |
| H | 33.12993844498382 | 14.49828345689740 | 84.55901447646438 |
| H | 41.08886219598805 | 19.61729778433504 | 92.33804718211800 |
| H | 41.96090280293496 | 18.51213879464371 | 91.25796206914669 |
| H | 32.46081083809375 | 18.23493852368241 | 94.34329822439938 |
| H | 31.88169714491144 | 18.91335049948518 | 95.87726686910602 |

**Cluster model of 3HDB**

|   |                  |                   |                   |
|---|------------------|-------------------|-------------------|
| C | 6.98873649986198 | 35.18037835017601 | 45.66841833483598 |
| C | 5.77164504273979 | 36.07329769413590 | 45.74327200416212 |
| O | 5.56655478579346 | 36.98356032794128 | 44.94652368367926 |
| C | 6.61913166324259 | 33.83079151473935 | 45.04629286518763 |
| N | 4.90127328799330 | 35.75340391322876 | 46.71720329911000 |
| C | 3.69254073211001 | 36.51844560105481 | 46.96879215345862 |
| C | 4.09841247555131 | 37.85221222090707 | 47.63584853260144 |
| O | 4.17371548103699 | 38.86918925799088 | 46.96444553334223 |

|   |                   |                   |                   |
|---|-------------------|-------------------|-------------------|
| C | 2.66424396251449  | 35.68493133673456 | 47.73222526967886 |
| C | 1.40896954867503  | 36.46177929041180 | 47.94529158673050 |
| N | 0.28739833284134  | 35.92904646845166 | 48.51782402425538 |
| C | 1.08983691844250  | 37.75572057779700 | 47.64649891095433 |
| C | -0.64705542495128 | 36.89011964632041 | 48.55106408984177 |
| N | -0.19242222903488 | 38.01183534413769 | 48.03375068301115 |
| N | 4.46148314420242  | 37.78564525283434 | 48.92149632787648 |
| C | 4.82839107194795  | 38.96422389869093 | 49.68092488176369 |
| C | 4.05364578678950  | 39.08313243850932 | 50.99168240902672 |
| C | 2.54210189468132  | 39.08505226000916 | 50.79429331227732 |
| C | 1.99082444563407  | 40.25959735505371 | 49.94200694145795 |
| O | 2.67066584260619  | 41.27953356020395 | 49.77694511561823 |
| O | 0.83027576127300  | 40.05333181983065 | 49.49468106349119 |
| C | 2.70651659626247  | 36.54254169340319 | 43.14123802658356 |
| C | 2.62709275405196  | 38.04064751611754 | 43.02682269750544 |
| O | 1.75771249474487  | 38.61297117001561 | 42.36809543725151 |
| N | 3.57504131427975  | 38.71364673624010 | 43.69897765393068 |
| C | 3.78817860281812  | 40.12942280366953 | 43.52775071888389 |
| C | 5.22855452351522  | 40.48338902890237 | 43.12024387231047 |
| O | 5.44374970687917  | 41.52229906798234 | 42.50550738366820 |
| C | 3.45336846678320  | 40.95789774063474 | 44.78068437682460 |
| C | 2.05545383637043  | 40.77299608854828 | 45.26186013410201 |
| N | 1.01930175331620  | 40.30625578358240 | 44.50210083678427 |
| C | 1.52868480698497  | 40.98549055364818 | 46.50668624710413 |
| C | -0.06368428572343 | 40.22648540982326 | 45.28845201828813 |
| N | 0.20953332878593  | 40.63711690011372 | 46.51282708379713 |
| N | 6.18485177824319  | 39.62796827323709 | 43.48377783325962 |
| C | 7.58433367166023  | 39.85373778315389 | 43.19908262638359 |
| C | -3.76544460905192 | 40.24841303220532 | 42.05549028737499 |
| C | -3.72955130440851 | 39.26308147793663 | 43.19762515320853 |
| O | -2.71339894038272 | 38.98727394803741 | 43.81950370509998 |
| N | -4.92750712894294 | 38.72156432221113 | 43.49512247321614 |
| C | -5.10106053749857 | 37.65646479559022 | 44.45148385747927 |
| C | -6.14884796218112 | 36.67825953132066 | 43.89810469264689 |
| O | -6.84461925694471 | 36.98036179570202 | 42.93596773685161 |
| C | -5.55255935200171 | 38.20241670940052 | 45.82877202708200 |
| C | -4.46143483715249 | 39.02261739857073 | 46.41682025670087 |
| N | -4.35202265624849 | 40.37827637772080 | 46.27216280318917 |

|   |                   |                   |                   |
|---|-------------------|-------------------|-------------------|
| C | -3.32747324073052 | 38.63545295590029 | 47.07448863693545 |
| C | -3.19026693887120 | 40.75552550275410 | 46.82960974570315 |
| N | -2.54821944896737 | 39.72232831071538 | 47.32276999575114 |
| N | -6.21456888981949 | 35.52270184224741 | 44.55553109355028 |
| C | -7.15590759527238 | 34.47729330787628 | 44.22141984892910 |
| C | -4.15093974607917 | 29.61652376909339 | 49.65563099020559 |
| C | -3.02586729886895 | 30.59641274806688 | 49.45629455143841 |
| O | -2.98892631530497 | 31.70277255158445 | 49.98394149258076 |
| N | -2.06175661992453 | 30.18659088603342 | 48.60902183694702 |
| C | -0.83018912081946 | 30.93772042904492 | 48.43727908851582 |
| C | -1.15169323577834 | 32.41698479388011 | 48.22682625917643 |
| O | -0.53334156742971 | 33.29264137687273 | 48.81046712156077 |
| C | -0.00752018525333 | 30.38723446665628 | 47.25420853108100 |
| C | 0.55688617667990  | 28.99941549594443 | 47.59667513989609 |
| C | 1.12666179661946  | 31.35180135671613 | 46.90807682618831 |
| C | 0.95300088310653  | 28.20590956050402 | 46.35574488053916 |
| N | -2.09713036560661 | 32.65779330943859 | 47.30217501450922 |
| C | -2.49157653524394 | 33.97972339066072 | 46.87353143403634 |
| C | -3.79312322011737 | 34.47270171318778 | 47.51863909776471 |
| O | -4.54311213442830 | 35.24870089368144 | 46.93291084786798 |
| C | -2.58546220730101 | 34.06387522073390 | 45.34735615332117 |
| C | -1.23646156271175 | 33.92793784043862 | 44.65593794807624 |
| S | 0.02889279196928  | 35.08343876393364 | 45.29552622628858 |
| C | -0.66412038720150 | 36.67643613971079 | 44.80318298094789 |
| N | -4.05379491446040 | 34.01603741614672 | 48.74318333832473 |
| C | -5.16688129330515 | 34.57569111938686 | 49.47753513157876 |
| C | -4.96001223126352 | 36.08761896284609 | 49.63451467743614 |
| O | -3.83641133896875 | 36.56811735843082 | 49.70689967976114 |
| N | -6.06947088478427 | 36.83914864597484 | 49.68539626517996 |
| C | -5.99153847520654 | 38.28874177780525 | 49.73480450304363 |
| C | -5.81254635836361 | 38.85152742303981 | 51.14426803330764 |
| O | -5.55189126109571 | 40.03954466821661 | 51.31564240223999 |
| C | -7.35317730689874 | 38.74036113964434 | 49.19307270207434 |
| C | -8.28424329551283 | 37.64677246135186 | 49.71107219116279 |
| C | -7.44691500340950 | 36.37871801406411 | 49.54325172258519 |
| N | -6.05082892259961 | 38.00135522996625 | 52.14194682192245 |
| C | -5.97027223371902 | 38.31827439501956 | 53.54526383004696 |
| C | -5.67125269701314 | 37.00773819260390 | 54.28256471163399 |

|    |                   |                   |                   |
|----|-------------------|-------------------|-------------------|
| O  | -5.89388299947643 | 35.93181725802170 | 53.72979299919425 |
| C  | -7.31338914146605 | 38.90046457991892 | 54.02829967910424 |
| O  | -7.19871995655450 | 39.25280710730447 | 55.38129294765849 |
| N  | -5.20272625794347 | 37.16591411240908 | 55.50972015831592 |
| C  | -4.86595098825252 | 36.06524477921366 | 56.38132186378663 |
| C  | -4.07554763392177 | 41.36433736629511 | 57.80821399997303 |
| C  | -4.23743059934548 | 41.05159034560263 | 56.34359243205898 |
| O  | -4.14692820471465 | 39.91951006966153 | 55.88134271988925 |
| N  | -4.55223743631433 | 42.11494796774883 | 55.57631375596137 |
| C  | -4.52148867153934 | 41.98485990781526 | 54.13717865848039 |
| C  | -3.12066494558382 | 41.56096539365630 | 53.66514384360587 |
| O  | -2.11197733197262 | 41.89582713426145 | 54.28009372042182 |
| C  | -4.84899128063064 | 43.32070551050172 | 53.46166935096107 |
| C  | -3.78629547671356 | 44.33284262569767 | 53.85805512938899 |
| O  | -3.76938605091725 | 44.82965575745909 | 54.98026243774753 |
| N  | -2.91708106466717 | 44.65552905312516 | 52.89621448427186 |
| N  | -3.13065621976063 | 40.82235727842610 | 52.55761204758004 |
| C  | -1.96315299391836 | 40.60692540847349 | 51.73171754988087 |
| C  | -2.06626656658529 | 41.61555423981334 | 50.53185111579145 |
| O  | -1.67215579000382 | 41.28596644086678 | 49.39549211622251 |
| C  | -1.79765035098630 | 39.14723466067068 | 51.33527026174373 |
| C  | -1.25714211072567 | 38.25730461069722 | 52.46279132989225 |
| C  | -2.32344756815614 | 37.92346923057871 | 53.50334281753310 |
| C  | -0.69573464742953 | 36.96130547882535 | 51.88229117268227 |
| O  | -2.56636576064547 | 42.72147878449884 | 50.80282216270724 |
| Zn | -0.70306664419775 | 39.99010745944069 | 48.20342653540735 |
| H  | 6.22163915079516  | 33.97519837855282 | 44.04477345406777 |
| H  | 5.87243997461689  | 33.31581091959359 | 45.64398940750473 |
| H  | 7.50458957206380  | 33.20511602310003 | 44.97788209933443 |
| H  | 7.73618095520400  | 35.67643774724372 | 45.04904678712186 |
| H  | 4.34715649694008  | 40.02289274507589 | 51.46127197408124 |
| H  | 4.32558807051555  | 38.26329232309651 | 51.66110503088409 |
| H  | 2.04250615031973  | 39.15895678606834 | 51.76361571726033 |
| H  | 2.20336001247653  | 38.16475833609583 | 50.31539053852293 |
| H  | 4.61501244259796  | 39.83362115230901 | 49.05579120812897 |
| H  | 2.03280262025209  | 36.19687688651231 | 43.92343245906517 |
| H  | 2.38340031607480  | 36.09934780698544 | 42.20346381952775 |
| H  | 7.66991735404141  | 40.77830886979766 | 42.63120013226322 |

|   |                   |                   |                   |
|---|-------------------|-------------------|-------------------|
| H | -4.55764331026241 | 40.97707448593238 | 42.20123003824129 |
| H | -7.74817848172207 | 34.81171408678039 | 43.37167485655641 |
| H | -3.78467053295677 | 28.74429633765160 | 50.19270699967425 |
| H | -0.67347129020113 | 30.29613240386498 | 46.38993865617105 |
| H | 1.74464993160907  | 30.93413592697692 | 46.11949118044635 |
| H | 0.74853171563869  | 32.31353021457567 | 46.56945069511038 |
| H | -0.17893563905682 | 28.41690715076369 | 48.15420427155220 |
| H | 1.42663491854198  | 29.12237147228583 | 48.24413948721669 |
| H | 1.33182063190837  | 27.22858881040345 | 46.64393491554219 |
| H | 0.09655181493557  | 28.06020146730997 | 45.70140626141827 |
| H | 1.73051131413517  | 28.71507834639463 | 45.79374413086233 |
| H | -0.22632560770980 | 30.88569080937660 | 49.35421026592159 |
| H | -3.03181872329220 | 35.02773067017274 | 45.09938886228522 |
| H | -3.25227888227253 | 33.28309475427888 | 44.97574467507950 |
| H | -1.33584199568531 | 34.10758159642618 | 43.58633991851127 |
| H | -0.80586124519031 | 32.94137721378229 | 44.81538349925131 |
| H | 0.06401712365235  | 37.43513376075200 | 45.07210784886129 |
| H | -0.83028471721543 | 36.69378532516349 | 43.73027442832512 |
| H | -1.58473260194899 | 36.87818787097670 | 45.34140895628819 |
| H | -1.70761316165082 | 34.66838255491821 | 47.21931181119564 |
| H | -5.20636093056468 | 34.11570309142460 | 50.46511177705149 |
| H | -6.09093640743943 | 34.37327422420985 | 48.93249443957217 |
| H | -7.33333073521757 | 38.74356233193948 | 48.10502334534472 |
| H | -7.61163360998438 | 39.73425700245510 | 49.54970652278124 |
| H | -9.21479912146921 | 37.59631462412975 | 49.15280694333092 |
| H | -8.51138665741213 | 37.81738559735231 | 50.76286649698579 |
| H | -7.68629787191597 | 35.62294283685269 | 50.29280919392225 |
| H | -7.59066886329070 | 35.95971261035431 | 48.54262612640357 |
| H | -5.14556246356399 | 38.64437561505327 | 49.13755651964777 |
| H | -8.09636500598817 | 38.14171219895875 | 53.88383613136801 |
| H | -7.54426091687688 | 39.77697142331253 | 53.40594266632561 |
| H | -8.03585462937069 | 39.62613383492526 | 55.68543136924905 |
| H | -5.17522715310279 | 39.04204787191784 | 53.74389866617663 |
| H | -5.08298121549349 | 35.13704334943494 | 55.85584231231133 |
| H | -4.89584046289669 | 41.98735345525132 | 58.15115700602109 |
| H | -5.82160539427137 | 43.67012337516245 | 53.80913789058217 |
| H | -4.85760227174703 | 43.18213956314163 | 52.38214580684988 |
| H | -2.12869508503952 | 45.23153360969615 | 53.14801671325050 |

|   |                   |                   |                   |
|---|-------------------|-------------------|-------------------|
| H | -2.81731184711339 | 44.06235636589061 | 52.07616148542440 |
| H | -5.25050172200320 | 41.22522787804215 | 53.83735649840950 |
| H | -1.08916506247757 | 39.13141911673105 | 50.50622739802181 |
| H | -2.75085840077098 | 38.75584493810108 | 50.97192026072696 |
| H | -0.44497112393134 | 38.80276688019988 | 52.96039209156247 |
| H | -1.91287522927934 | 37.25659561288539 | 54.25804267642251 |
| H | -2.68415999049005 | 38.81583429906259 | 54.00753113151417 |
| H | -3.16371463342300 | 37.42403486754940 | 53.02494008714833 |
| H | -0.27847090103575 | 36.34204225057052 | 52.67215007723890 |
| H | -1.48988674427624 | 36.40941502218823 | 51.38676676517422 |
| H | 0.08410060418154  | 37.18525078923996 | 51.16060912101432 |
| H | -1.09140345544342 | 40.94042448719145 | 52.31258205722971 |
| H | 3.27376541614015  | 36.79891424506788 | 45.99580574929478 |

**Cluster model of 3K7N**

|   |                    |                    |                   |
|---|--------------------|--------------------|-------------------|
| C | -23.84134209445437 | -36.25047795971020 | 20.81460091675682 |
| C | -23.60639068549136 | -37.33659989115816 | 19.79776285790885 |
| O | -22.63905508972707 | -38.08795809073571 | 19.82014224123807 |
| N | -24.54214425572565 | -37.40350365779507 | 18.82620004922705 |
| C | -24.54003307430815 | -38.47619725351050 | 17.84931795962300 |
| C | -23.12027994392626 | -38.69601528727439 | 17.32124408251664 |
| O | -22.65171691447314 | -39.82282127336623 | 17.22162415081303 |
| C | -25.48885592908286 | -38.17242077595038 | 16.67665327692809 |
| C | -25.46348234199936 | -39.28453339611539 | 15.68257681672719 |
| N | -22.48585825574152 | -37.58904737658690 | 16.93365153426858 |
| C | -21.12925037616359 | -37.58672469190180 | 16.43157700159067 |
| C | -20.88301977223076 | -36.43296193010084 | 15.46726979315267 |
| C | -21.72979282649098 | -36.53925392691872 | 14.20515644077810 |
| C | -21.40630256457854 | -37.78374059480534 | 13.33575434436626 |
| O | -22.28081610315500 | -38.07696947767307 | 12.48170232110927 |
| O | -20.33699694740521 | -38.39069940976774 | 13.51422763374750 |
| C | -23.01846019892036 | -41.31965492613398 | 20.65524815940632 |
| C | -21.64338882176486 | -41.79604370166556 | 20.26629270255546 |
| O | -20.91455234346059 | -42.43912323521496 | 21.01465375892726 |
| N | -21.26758705937814 | -41.44184790280853 | 19.02204797526197 |
| C | -19.90038294340629 | -41.60345040562476 | 18.58382951884277 |
| C | -18.94723947164675 | -40.71485270969477 | 19.40536563774082 |

|   |                    |                    |                   |
|---|--------------------|--------------------|-------------------|
| O | -17.78247988901285 | -41.03545423366086 | 19.60091841953717 |
| C | -19.71910194999785 | -41.21825238542238 | 17.11105810221251 |
| C | -20.72431752455396 | -41.80970525845892 | 16.18211322033803 |
| N | -21.46306992034667 | -42.92694122555852 | 16.44216664760403 |
| C | -21.09606090090566 | -41.41265243997728 | 14.92376380350927 |
| C | -22.24427541384311 | -43.15079935974603 | 15.37284431528059 |
| N | -22.03950323122404 | -42.26092462013422 | 14.43256818946975 |
| N | -19.48722619540433 | -39.56262282756226 | 19.81033953357534 |
| C | -18.79788545721011 | -38.57181262844917 | 20.61003393408183 |
| C | -19.09502782740712 | -37.17433004052109 | 20.08599201069440 |
| C | -20.72104398742499 | -46.66456595059613 | 17.76190718774694 |
| C | -22.13240177330738 | -46.21645084018787 | 17.47753962522939 |
| O | -22.57278666708528 | -45.13032380645728 | 17.83795378290693 |
| N | -22.84770548832129 | -47.07925171056210 | 16.72915230761685 |
| C | -24.26830078148812 | -46.93249856822799 | 16.50466516019140 |
| C | -25.03294105263664 | -47.85361783471919 | 17.47457156266480 |
| O | -24.45085076682818 | -48.71973617541161 | 18.11623345047612 |
| C | -24.63702349800374 | -47.27530276141805 | 15.04828576705995 |
| C | -24.09838045437047 | -46.27311438223728 | 14.09043165180574 |
| N | -22.95712592325220 | -46.44315854806081 | 13.35376796396118 |
| C | -24.57756168728235 | -45.04034388318669 | 13.73850461413013 |
| C | -22.79626869319673 | -45.34083077948127 | 12.59625716488964 |
| N | -23.76203253394650 | -44.47947567859664 | 12.80340877020147 |
| N | -26.34394061895173 | -47.61973243650834 | 17.52569478222782 |
| C | -27.24976582901558 | -48.38641789864649 | 18.35093799436914 |
| C | -33.54067021101827 | -43.33032078335045 | 16.22179961377145 |
| C | -32.24392182006341 | -42.60938130474226 | 16.47694291153273 |
| O | -31.37485005149586 | -42.45599143025111 | 15.62451811671943 |
| N | -32.07838010131178 | -42.17724816039211 | 17.74140590797299 |
| C | -30.98067708628622 | -41.30723824397963 | 18.12838539924013 |
| C | -29.66735019176030 | -41.73963872250454 | 17.47330411016257 |
| O | -28.92703957210880 | -40.92501764093713 | 16.94751751415538 |
| C | -30.82079454673112 | -41.30726256238840 | 19.64702803179219 |
| N | -29.36181740712486 | -43.04110278834936 | 17.62522543039110 |
| C | -28.12270479616373 | -43.61355599097838 | 17.16089238162999 |
| C | -28.29331700061571 | -44.63411263999431 | 16.03093299286825 |
| O | -27.46066026619487 | -45.51818662149527 | 15.84831893894662 |
| C | -27.30063370381239 | -44.20861928598568 | 18.30873139447889 |

|    |                    |                    |                   |
|----|--------------------|--------------------|-------------------|
| C  | -26.79128396489476 | -43.16425724145653 | 19.28905887753609 |
| S  | -25.94907576216760 | -41.75167081918031 | 18.48984558789767 |
| C  | -24.67947896822863 | -42.57274358494526 | 17.49468293947658 |
| N  | -29.39334646730729 | -44.50726685814143 | 15.28320333385022 |
| C  | -29.44981208417840 | -45.15688550148395 | 13.98380258422972 |
| C  | -28.30896267699796 | -44.57088122996394 | 13.13444720868563 |
| O  | -27.82523717565405 | -43.48055542441688 | 13.40470086153399 |
| C  | -30.82668092173926 | -44.91230534996242 | 13.36239737554354 |
| C  | -31.02324175987588 | -45.60079521212714 | 12.01733797750543 |
| N  | -27.84317029133194 | -45.36061745906427 | 12.15932548085787 |
| C  | -26.85135790970792 | -44.87869638559794 | 11.21709217275202 |
| C  | -27.52605234808665 | -43.99697431846956 | 10.15448536149412 |
| O  | -28.70750946876677 | -44.13081384898408 | 9.86112687830338  |
| C  | -26.14744146096512 | -46.05876380593690 | 10.55609967914465 |
| N  | -26.69833880332031 | -43.12467198342386 | 9.57251317787779  |
| C  | -27.11307223805717 | -42.19945397936753 | 8.54213687052592  |
| Zn | -23.51654623450744 | -41.97427303349051 | 12.64033093854631 |
| O  | -21.81742084358000 | -40.50077915900239 | 11.52309627096273 |
| H  | -22.99741902115551 | -36.20413575744649 | 21.49667053479214 |
| H  | -19.83082078619804 | -36.46143027535520 | 15.17987719135940 |
| H  | -21.08023449367965 | -35.48178431077095 | 15.96775189230286 |
| H  | -21.56300696767790 | -35.66852374568393 | 13.56550626943981 |
| H  | -22.79651177047775 | -36.58027868729987 | 14.43523158822129 |
| H  | -20.96510396801679 | -38.53396540007296 | 15.91324138156536 |
| H  | -23.75731934424115 | -41.65261867801006 | 19.93441991347388 |
| H  | -23.26862828730184 | -41.68832843221162 | 21.64483319634653 |
| H  | -18.64901831739894 | -36.43116335563883 | 20.73912861414373 |
| H  | -20.17161717984313 | -37.02068090248896 | 20.05436414331137 |
| H  | -17.73172399946561 | -38.80303216789842 | 20.56055776827369 |
| H  | -20.15333287672915 | -46.70648752024785 | 16.83529712620550 |
| H  | -26.67840407693249 | -49.17075768523530 | 18.84427743812575 |
| H  | -34.37343624514261 | -42.64061882399528 | 16.33846254370777 |
| H  | -30.66760137019906 | -42.31639599778445 | 20.02020423913098 |
| H  | -31.17120635016266 | -40.28380389063550 | 17.77529796736402 |
| H  | -26.45329103362130 | -44.73627479419793 | 17.86983260192207 |
| H  | -27.90437414796090 | -44.93641669845582 | 18.85466897752366 |
| H  | -26.09111690839342 | -43.61528110305905 | 19.99237854992600 |
| H  | -27.60690220863623 | -42.69989381118557 | 19.84053209726905 |

|   |                    |                    |                   |
|---|--------------------|--------------------|-------------------|
| H | -23.99084575343867 | -41.79405610346031 | 17.17743177891444 |
| H | -25.12946824744791 | -43.02854920358324 | 16.61654502439145 |
| H | -24.15315129255427 | -43.31294024566313 | 18.09068312864428 |
| H | -27.56070252812669 | -42.77953923786043 | 16.71662687076129 |
| H | -30.96619191177203 | -43.83500297570206 | 13.25098353883666 |
| H | -31.57259243107648 | -45.27808724900467 | 14.07093296399593 |
| H | -30.37680149596464 | -45.17021816273024 | 11.25581880228445 |
| H | -29.27047488617169 | -46.22836064086209 | 14.12682305262126 |
| H | -26.85061522626865 | -46.62251941642227 | 9.94694816762968  |
| H | -25.73045692548056 | -46.70850755627992 | 11.32051362165099 |
| H | -26.13860605159124 | -44.26558479838793 | 11.77812791467355 |
| H | -28.15278884384287 | -42.41107394390995 | 8.29926633455285  |
| H | -24.85101198646692 | -39.41801377157959 | 18.32365226161196 |
| H | -25.18268600981106 | -37.24443621956926 | 16.18993601333140 |
| H | -26.50444658357112 | -38.06243762294702 | 17.05970967875205 |
| H | -19.58767892814572 | -42.64107978427420 | 18.75803393796131 |
| H | -18.70982260027550 | -41.51540606039499 | 16.81130763813470 |
| H | -19.77707873992322 | -40.13233136881495 | 17.01468823566207 |
| H | -20.74429786621682 | -40.56994645958858 | 14.36103012161441 |
| H | -22.94131035836511 | -43.96002885635892 | 15.31848930705560 |
| H | -24.52516171447089 | -45.89015196372370 | 16.71623764789545 |
| H | -25.72392945308388 | -47.27030172589205 | 14.96800359982178 |
| H | -24.26364290188743 | -48.27250488434846 | 14.81182381960261 |
| H | -25.45799313526459 | -44.54156261029939 | 14.08927557929761 |
| H | -21.98971144991219 | -45.19421437987445 | 11.90870791643644 |
| H | -21.50690160321867 | -43.45987393031399 | 17.30126067387329 |
| H | -22.35370754555682 | -47.25104605004405 | 13.37256084794963 |
| H | -21.87106443537229 | -40.86338686653069 | 18.44258119589464 |
| H | -20.46755337392094 | -39.38412844083022 | 19.63480235298095 |
| H | -19.12646357092697 | -38.66087627658037 | 21.65188421677477 |
| H | -18.69051413935259 | -37.04934775202792 | 19.08455102123883 |
| H | -23.01521057989832 | -40.23142437912036 | 20.65781921619318 |
| H | -22.50172229578278 | -48.02578826786726 | 16.64734193480205 |
| H | -26.74342722723614 | -46.88259954142178 | 16.95016573138974 |
| H | -20.24374667035260 | -45.96039909555568 | 18.43849751879501 |
| H | -28.02899501108350 | -48.83382095020345 | 17.73500316255000 |
| H | -27.70743446400163 | -47.74757281891011 | 19.10665431894343 |
| H | -25.38058683483089 | -36.84641312247123 | 18.90407580392865 |

|   |                    |                    |                   |
|---|--------------------|--------------------|-------------------|
| H | -22.91196483901978 | -36.68832542377038 | 17.09259088783711 |
| H | -23.96240187333084 | -35.28988812961493 | 20.32106601375115 |
| H | -24.74318839660931 | -36.46995925153263 | 21.38117848356480 |
| H | -20.42866304641520 | -37.52269885620159 | 17.27385867057716 |
| H | -29.95926636342684 | -43.66568692761197 | 15.37219460926928 |
| H | -28.36636346559656 | -46.17957238264407 | 11.88787033710896 |
| H | -25.76014063588988 | -43.01556761407358 | 9.93325773174259  |
| H | -32.05077240764282 | -45.46712759287035 | 11.68974352758064 |
| H | -30.83066830507534 | -46.66832268921450 | 12.09795356125013 |
| H | -30.03062737770210 | -43.65996939723134 | 18.05866799545703 |
| H | -32.85229989847968 | -42.23649327746897 | 18.38828320164311 |
| H | -31.70638321047083 | -40.88539800974219 | 20.11494721755881 |
| H | -29.96356585386677 | -40.69868113223257 | 19.92175358004573 |
| H | -25.34268086513541 | -45.70074669682349 | 9.92207440526084  |
| H | -33.54500901754673 | -43.71828965360864 | 15.20741144611244 |
| H | -33.66383017534753 | -44.14842089901246 | 16.92671811686275 |
| H | -26.49583110036022 | -42.32961899845261 | 7.65322117573315  |
| H | -27.02384403894825 | -41.17130450321454 | 8.89414135532868  |
| H | -20.72471679445660 | -47.65063926254231 | 18.21897243217173 |
| H | -20.90975423364319 | -40.65125378295827 | 11.79902902834747 |
| H | -22.02361183678167 | -39.57637604642004 | 11.82863339665802 |
| H | -23.62278669506166 | -39.14738103745295 | 14.46198695367272 |
| H | -26.68279432074274 | -41.93816799131216 | 14.33394107341862 |

**Cluster model of 4Q11**

|   |                    |                   |                   |
|---|--------------------|-------------------|-------------------|
| N | -6.67614900687278  | -5.25313734472086 | 7.07496578071551  |
| C | -6.66904554501988  | -6.60675077659367 | 9.02765341632249  |
| C | -7.84980076305921  | -7.33250994303405 | 8.72087400752536  |
| O | -7.85983056278557  | -8.32173728501290 | 7.95778479802983  |
| C | -6.58609842571095  | -5.53422151043694 | 10.04728706020211 |
| N | -9.01365795899069  | -6.93145620667119 | 9.34902197304601  |
| C | -10.27003401717299 | -7.53537890891021 | 8.96372176546419  |
| C | -10.45876374339739 | -7.45021029439999 | 7.44231522543799  |
| O | -10.59719520367672 | -8.45100445741197 | 6.74767903065455  |
| C | -11.43332904487530 | -6.86704918336334 | 9.71194032203034  |
| C | -12.74230758376336 | -7.47278972369868 | 9.34822873332111  |
| N | -13.61695011241607 | -7.99146361969177 | 10.25847651065734 |

|   |                    |                    |                   |
|---|--------------------|--------------------|-------------------|
| C | -13.32097721865410 | -7.67777314268239  | 8.12813376976802  |
| C | -14.66727228906644 | -8.47889097688960  | 9.58781853017880  |
| N | -14.51391424884288 | -8.31439724714332  | 8.28778062202050  |
| N | -10.40745349133777 | -6.20564604772380  | 6.96090696696225  |
| C | -10.84714555885319 | -5.86943060976442  | 5.62368439607625  |
| C | -10.10650622950951 | -4.65579039627067  | 5.05517020194075  |
| C | -9.91778385671737  | -3.52167751785485  | 6.07010875283167  |
| C | -11.17182192071643 | -3.28622284708453  | 6.96412657280361  |
| O | -12.08256414958511 | -2.56536730435354  | 6.52598357619197  |
| O | -11.14366315692021 | -3.84947912483788  | 8.08803059453050  |
| C | -8.75212005975983  | -11.20886157376161 | 9.03441000476720  |
| C | -8.97567676647143  | -11.87254635900590 | 7.70437957548078  |
| O | -8.56092374910062  | -12.99725051551042 | 7.43908269937566  |
| N | -9.68900956785504  | -11.14553333716847 | 6.81506904093706  |
| C | -9.69023382100267  | -11.52732843695727 | 5.42236816563212  |
| C | -8.32542529765517  | -11.26042349786735 | 4.75809922726012  |
| O | -7.95178145513818  | -11.92848816975900 | 3.80128939599830  |
| C | -10.73974108920983 | -10.76310541466491 | 4.60270549744612  |
| C | -12.12316232889994 | -10.82451189772735 | 5.14280571135241  |
| N | -12.79218965177256 | -11.96171545378357 | 5.50143532576269  |
| C | -13.00020589828397 | -9.80194736364536  | 5.36807841702286  |
| C | -14.01005581977895 | -11.60736631497799 | 5.93547575512559  |
| N | -14.16919822978378 | -10.29969650914760 | 5.86371895762016  |
| N | -7.63708510169077  | -10.23726914673814 | 5.26927371425056  |
| C | -6.33785962189269  | -9.84189653073976  | 4.77855889671057  |
| C | -16.06819312710290 | -15.12843362149674 | 7.18213422818968  |
| C | -16.09339776800537 | -14.26577328563799 | 8.41882877590457  |
| O | -15.10729890590699 | -13.67662347020050 | 8.84538547324687  |
| N | -17.30559577729111 | -14.15526582274784 | 8.98953137773715  |
| C | -17.53184329445368 | -13.51168883181900 | 10.25976874251303 |
| C | -18.19815166709051 | -14.52746429986062 | 11.20611043802943 |
| O | -18.79703259141546 | -15.50011649548218 | 10.76225817887888 |
| C | -18.45759889606330 | -12.28794417727259 | 10.13242693880559 |
| C | -17.99688601875145 | -11.31137847671077 | 9.10480010572692  |
| N | -18.86671593053866 | -10.47015761231430 | 8.46984521691764  |
| C | -16.76966810202192 | -11.04445899675125 | 8.56546750710527  |
| C | -18.16869675901641 | -9.73533992965824  | 7.60329220564975  |
| N | -16.89188541084185 | -10.06236870650434 | 7.62304982465369  |

|   |                    |                    |                   |
|---|--------------------|--------------------|-------------------|
| N | -18.08813614973892 | -14.22448185110006 | 12.49776775753939 |
| C | -18.66154515629328 | -15.03249574319522 | 13.55077356561792 |
| C | -14.39087513071164 | -10.24236027448918 | 17.84300582051493 |
| C | -14.08775428287774 | -9.56175639917471  | 16.53267733898963 |
| O | -14.93086354176205 | -9.00484351652879  | 15.84552255368095 |
| N | -12.79605426172768 | -9.64207699843951  | 16.14755765292129 |
| C | -12.29467431014307 | -8.91420805067301  | 14.99481711264796 |
| C | -13.21302303167096 | -9.14561164083944  | 13.79957617305818 |
| O | -13.55878547265847 | -8.22974217201499  | 13.06119201365318 |
| C | -10.84961372400601 | -9.34716166673234  | 14.67157560307552 |
| C | -9.88590956506644  | -8.81081281357876  | 15.74177213987483 |
| C | -10.44043984436407 | -8.84962551282323  | 13.28620726140642 |
| C | -8.57304233955027  | -9.58551236082331  | 15.78714846966812 |
| N | -13.55893799249115 | -10.41984183693735 | 13.58489209005690 |
| C | -14.36659252892546 | -10.83734055542640 | 12.45332718945077 |
| C | -15.85392146088294 | -10.77641979117820 | 12.82864646946921 |
| O | -16.56735750279888 | -11.76805119576804 | 12.91177246425918 |
| C | -13.92543051533070 | -12.21135831841343 | 11.95402908496881 |
| C | -12.44848786251308 | -12.22110050927837 | 11.57535963943796 |
| S | -12.00477666023768 | -10.85166065732551 | 10.43924300441362 |
| C | -12.46230617956548 | -11.56705645771816 | 8.84354926089390  |
| N | -16.29287480006823 | -9.53896565045549  | 13.06498056986231 |
| C | -17.63710491132240 | -9.29271631489699  | 13.54264487096385 |
| C | -18.61405408170934 | -9.22856857972860  | 12.35719454024264 |
| O | -18.26772617188202 | -8.94832248233460  | 11.22079198774216 |
| C | -17.68763781398621 | -8.00353747503302  | 14.35702292068461 |
| N | -19.88655007365027 | -9.47867375403925  | 12.70549711952544 |
| C | -20.97243920250611 | -9.66191495455481  | 11.75407063870396 |
| C | -20.90958975816961 | -8.64597188489964  | 10.60848710207952 |
| O | -20.98551688992690 | -9.01722905160617  | 9.44249196450145  |
| C | -22.31366113158672 | -9.55611945224802  | 12.47575079345238 |
| N | -20.85558147214828 | -7.36878668010764  | 10.98276154409811 |
| C | -20.83302816857967 | -6.26433066503549  | 10.05093323287997 |
| C | -19.96708522702115 | -5.08090190558069  | 3.78509038524587  |
| C | -18.51906350273164 | -4.74773549916259  | 4.06316488784364  |
| O | -17.95996774942453 | -3.75183658327264  | 3.61954367536910  |
| N | -17.90048294670052 | -5.63694632985748  | 4.85967633440145  |
| C | -16.50028942471037 | -5.57013657006921  | 5.19980813581858  |

|    |                    |                    |                   |
|----|--------------------|--------------------|-------------------|
| C  | -15.99098874766832 | -6.97801274645648  | 5.48911809813905  |
| O  | -14.77706485232714 | -7.19633410747586  | 5.58248635391523  |
| C  | -16.23846697401149 | -4.69837245644487  | 6.44911652661284  |
| C  | -16.50336634079209 | -5.37840626023887  | 7.75532511028026  |
| C  | -17.49252322686743 | -6.25892578259071  | 8.09546613524829  |
| C  | -15.71578938685909 | -5.19027764892450  | 8.93488495092079  |
| N  | -17.38252628028010 | -6.62327604407692  | 9.41128225350940  |
| C  | -16.30054664292331 | -5.99107614076003  | 9.94745387962076  |
| C  | -14.58334231309441 | -4.43214810292230  | 9.23444881356833  |
| C  | -15.78765127786348 | -6.02243057504445  | 11.23789820807702 |
| C  | -14.07711184097036 | -4.47805038675396  | 10.51423278001880 |
| C  | -14.67343262953309 | -5.25980465832408  | 11.50825780277247 |
| O  | -16.84466055464877 | -7.88273942342661  | 5.67165499198244  |
| Zn | -15.47193567116939 | -8.99916662095536  | 6.67595165429016  |
| H  | -6.73447181130263  | -5.95099173003989  | 11.04630968725568 |
| H  | -5.60944353381687  | -5.06218724047463  | 10.01555514110113 |
| H  | -7.34920173191023  | -4.77077474688460  | 9.89815502561934  |
| H  | -5.75397504195148  | -7.03394904536410  | 8.65455171258321  |
| H  | -6.74569790645988  | -4.25706112850305  | 7.23190627684820  |
| H  | -5.87956288967215  | -5.44679902417804  | 6.48515215445629  |
| H  | -7.51688504873636  | -5.58599407933164  | 6.62393560335628  |
| H  | -10.68896222568514 | -4.28509104120490  | 4.21000747317120  |
| H  | -9.12620603153936  | -4.96083466151635  | 4.68016726435017  |
| H  | -9.69901817174708  | -2.59289641898416  | 5.54054847971620  |
| H  | -9.08975351023028  | -3.75119112841836  | 6.74370318672839  |
| H  | -11.92318540862727 | -5.64091081170180  | 5.65357379197229  |
| H  | -9.69571174403268  | -11.03231740871043 | 9.54371865674736  |
| H  | -8.11832915895016  | -11.83823659307047 | 9.65136121217501  |
| H  | -6.02974342914736  | -10.56135928917814 | 4.02175341877663  |
| H  | -16.64191251713154 | -14.64941208886280 | 6.39183952158836  |
| H  | -19.21085709225542 | -15.85178029027875 | 13.09034464047002 |
| H  | -13.95179226130655 | -9.66949397300553  | 18.65706099658916 |
| H  | -10.81382908994286 | -10.44150230694166 | 14.67699300942169 |
| H  | -9.38900420290995  | -9.05271114046814  | 13.10908317783802 |
| H  | -10.60050205801434 | -7.77634454486377  | 13.21116126389040 |
| H  | -11.00999678152172 | -9.33795099333289  | 12.49881871284059 |
| H  | -10.34922766896960 | -8.86155115520000  | 16.72901239028614 |
| H  | -9.68165130407032  | -7.75901620069908  | 15.53453259033515 |

|   |                    |                    |                   |
|---|--------------------|--------------------|-------------------|
| H | -7.92268312272652  | -9.17304318243203  | 16.55429990755098 |
| H | -8.75080194465974  | -10.63364485178941 | 16.01679585919709 |
| H | -8.05028542586487  | -9.52886204324712  | 14.83655753407117 |
| H | -12.31301060289737 | -7.83239254923293  | 15.18990386322196 |
| H | -14.52311426057327 | -12.46915160378316 | 11.07868256834710 |
| H | -14.10837961318981 | -12.96795560182692 | 12.71902493941462 |
| H | -12.17893338186296 | -13.15208750367042 | 11.08196476433112 |
| H | -11.81045621655303 | -12.07745056322471 | 12.44480652559010 |
| H | -12.50713935406997 | -10.73861907957627 | 8.14313939913274  |
| H | -11.69619919853576 | -12.27472027491245 | 8.53613176207528  |
| H | -14.19361731925444 | -10.10552081296480 | 11.65743732693926 |
| H | -18.64778476388020 | -7.89982659996749  | 14.85260184144472 |
| H | -16.90247264418959 | -8.03260483870779  | 15.10843147117624 |
| H | -17.52575665696394 | -7.13866383348642  | 13.71807532281313 |
| H | -17.90964383113027 | -10.14931575895514 | 14.17169366259548 |
| H | -22.40532414703191 | -10.35055805384053 | 13.21206455340631 |
| H | -23.12274974699439 | -9.66107431067274  | 11.75801612958155 |
| H | -20.88711262382104 | -10.65566365878139 | 11.29233962666534 |
| H | -20.93491025498578 | -6.66857789571413  | 9.04611586284490  |
| H | -20.39610075556410 | -4.31132044025064  | 3.15065423523336  |
| H | -16.84560220241607 | -3.79202935312968  | 6.34754591824252  |
| H | -15.19096067295003 | -4.38620100768047  | 6.43100178795630  |
| H | -18.29961644131851 | -6.63171802039600  | 7.49818757806237  |
| H | -14.09976100685343 | -3.82582225396883  | 8.47931170475113  |
| H | -13.19667237786782 | -3.89608728122945  | 10.74788111442913 |
| H | -16.24260501683163 | -6.63808130369313  | 11.99637464989569 |
| H | -14.24468959597172 | -5.27035294255923  | 12.49833036479667 |
| H | -15.94927690250536 | -5.13199024092364  | 4.35836478602625  |
| H | -10.22894292590238 | -8.60186000783406  | 9.21987433524926  |
| H | -11.45577160698566 | -5.79928997390425  | 9.47185047808814  |
| H | -11.27083071439697 | -6.97885822751137  | 10.78427357540439 |
| H | -12.97932779192230 | -7.39177990631978  | 7.15826493013026  |
| H | -15.52426285157827 | -8.93698833662101  | 10.04101672155038 |
| H | -9.85167479636588  | -12.61054267375669 | 5.36356871892882  |
| H | -10.70777022249300 | -11.15629228327888 | 3.58316413294559  |
| H | -10.45867210377155 | -9.70977295228491  | 4.57690215366844  |
| H | -12.86473450945419 | -8.75508412645093  | 5.19866735093569  |
| H | -14.74537263824726 | -12.29502258679457 | 6.30165285389455  |

|   |                    |                    |                   |
|---|--------------------|--------------------|-------------------|
| H | -16.56335398917560 | -13.20152869251202 | 10.65819577150221 |
| H | -18.49413718340620 | -11.80042440963303 | 11.10965284671022 |
| H | -19.46296264349985 | -12.62670071932303 | 9.87134574489783  |
| H | -15.82125594629168 | -11.49268575581292 | 8.77316957454060  |
| H | -18.59264742039626 | -9.00118656283470  | 6.95189710005624  |
| H | -20.51843278334431 | -5.12922185213750  | 4.71995124166205  |
| H | -20.03377684390826 | -6.04248967522507  | 3.28324407623398  |
| H | -15.04287508490298 | -15.26391216795927 | 6.85082437658489  |
| H | -16.50973870691228 | -16.09916691839311 | 7.39133672072161  |
| H | -5.61948111576328  | -9.83327380895274  | 5.59719032485767  |
| H | -6.39022969913354  | -8.84750467457689  | 4.33402870146321  |
| H | -17.87612772447328 | -15.43877787367360 | 14.18809418025077 |
| H | -19.34063036443712 | -14.43285191750140 | 14.15589792546815 |
| H | -10.70147232065154 | -6.74408464704085  | 4.98361390284577  |
| H | -13.42575331241574 | -12.05847474440601 | 8.92390065432362  |
| H | -22.41504421378978 | -8.59584265983471  | 12.97414465684797 |
| H | -13.97584125256961 | -11.24631513527343 | 17.86017159902801 |
| H | -15.46607590287184 | -10.28826275104097 | 17.98767515685362 |
| H | -7.99287349196620  | -9.72395601428199  | 6.06596239849728  |
| H | -9.94356618984460  | -10.17967441323829 | 7.01723433526607  |
| H | -9.06203516082909  | -5.97263801955725  | 9.65684053927417  |
| H | -10.51728916511058 | -5.41639118397387  | 7.60907955234480  |
| H | -18.05637383082490 | -14.76256272046659 | 8.68734014941132  |
| H | -17.54561324284033 | -13.41289313260235 | 12.77028580487153 |
| H | -18.34771616334116 | -6.50763818839342  | 5.11618712632453  |
| H | -20.76826877591325 | -7.14099284794845  | 11.96161077799772 |
| H | -20.08971468211304 | -9.75892611048429  | 13.65472775243132 |
| H | -15.65115587590938 | -8.75765922295357  | 13.01717774869979 |
| H | -13.31024826298753 | -11.12625035510147 | 14.26107726047194 |
| H | -12.11356183043570 | -10.03539862824402 | 16.77883368924021 |
| H | -17.89863881384777 | -7.36611240894911  | 9.86177039857660  |
| H | -12.41868432239894 | -12.89845404362305 | 5.45989159757184  |
| H | -19.83928314113347 | -10.28412792261946 | 8.71818120398173  |
| H | -13.51273929557554 | -7.96568488772783  | 11.27656477243410 |
| H | -21.66387755597575 | -5.58892838708684  | 10.25418391206878 |
| H | -19.89475304581669 | -5.71371326003720  | 10.12516114440286 |
| H | -8.27012259952894  | -10.24764501406744 | 8.86530696029739  |

## Cartesian coordinates of the MET···Zn models

1BUD (includes GLU)

|   |             |             |             |
|---|-------------|-------------|-------------|
| C | 19.88165324 | 12.56577022 | 20.63082714 |
| C | 20.49400000 | 13.92800000 | 20.85300000 |
| O | 21.67328510 | 14.10442567 | 21.12107660 |
| N | 19.61853745 | 14.94565253 | 20.77255962 |
| C | 20.00000000 | 16.34300000 | 20.85200000 |
| C | 20.66700000 | 16.69100000 | 22.19500000 |
| O | 21.64843531 | 17.41851115 | 22.25140265 |
| C | 18.68803791 | 17.12874684 | 20.66665826 |
| C | 18.86568141 | 18.59396888 | 20.55033949 |
| N | 18.82172152 | 19.23410680 | 19.34565266 |
| C | 19.05914930 | 19.56918460 | 21.48562379 |
| C | 18.98444969 | 20.54154290 | 19.57723565 |
| N | 19.12932140 | 20.77159345 | 20.86048971 |
| N | 20.08461796 | 16.14706937 | 23.26630408 |
| C | 20.53067727 | 16.38000255 | 24.62344053 |
| C | 19.36270722 | 16.43531485 | 25.60321955 |
| C | 18.37122042 | 17.54399280 | 25.27340347 |
| C | 18.96419901 | 18.97471449 | 25.35803728 |
| O | 20.03888013 | 19.16039971 | 25.94962244 |
| O | 18.26541780 | 19.86352592 | 24.80459937 |
| C | 24.01015487 | 19.47393802 | 24.79909612 |
| C | 23.33935158 | 20.47906762 | 23.93269759 |
| N | 23.82374261 | 21.75098865 | 23.77079869 |
| C | 22.23982662 | 20.40350881 | 23.12580562 |
| C | 23.01602274 | 22.38224079 | 22.89771741 |
| N | 22.04904436 | 21.59286714 | 22.48756953 |
| C | 21.88071956 | 25.26325608 | 17.77059739 |
| C | 21.37231416 | 25.10722728 | 19.15863954 |
| N | 20.58064455 | 26.04779880 | 19.76336206 |
| C | 21.51335141 | 24.10403012 | 20.07244273 |
| C | 20.27775987 | 25.58748812 | 20.99549393 |
| N | 20.82715542 | 24.41649299 | 21.20959673 |
| C | 18.95900000 | 16.84200000 | 15.00700000 |
| C | 19.28500000 | 18.08200000 | 15.85600000 |
| O | 18.57693642 | 18.31976438 | 16.82613296 |
| N | 20.31796470 | 18.85333132 | 15.49696020 |

|    |             |             |             |
|----|-------------|-------------|-------------|
| C  | 20.74900000 | 19.98500000 | 16.29900000 |
| C  | 20.08300000 | 21.30600000 | 15.94200000 |
| O  | 20.57977510 | 22.38084775 | 16.26417304 |
| C  | 22.27346737 | 20.09922167 | 16.30880157 |
| C  | 22.94776620 | 18.88373427 | 16.93401852 |
| S  | 22.21656135 | 18.36451142 | 18.53066934 |
| C  | 22.61428608 | 19.77654094 | 19.58202600 |
| N  | 18.93376144 | 21.22665370 | 15.26496259 |
| C  | 18.13200000 | 22.40400000 | 15.00800000 |
| Zn | 19.91900000 | 22.36800000 | 22.18600000 |
| O  | 19.59172904 | 22.13415396 | 24.73364401 |
| H  | 20.65370678 | 11.80832896 | 20.72586387 |
| H  | 19.77302326 | 16.62412918 | 26.59628602 |
| H  | 18.84504546 | 15.47328139 | 25.61821022 |
| H  | 17.53520635 | 17.52212346 | 25.97754113 |
| H  | 17.95641461 | 17.43389046 | 24.26927385 |
| H  | 21.05947160 | 17.33594143 | 24.63850176 |
| H  | 17.91682646 | 16.59246397 | 15.24493219 |
| H  | 22.54770572 | 20.99006481 | 16.87500878 |
| H  | 22.65014990 | 20.22548473 | 15.29181952 |
| H  | 24.00204244 | 19.09399794 | 17.10958687 |
| H  | 22.85717002 | 18.00062779 | 16.30419716 |
| H  | 21.89083359 | 20.57407135 | 19.43141549 |
| H  | 22.55431728 | 19.42518366 | 20.60761753 |
| H  | 20.42406850 | 19.77301123 | 17.32821112 |
| H  | 18.72733100 | 23.11783624 | 14.43078345 |
| H  | 20.72349586 | 16.59406115 | 20.06675406 |
| H  | 18.03299056 | 16.91937220 | 21.51586770 |
| H  | 18.21133082 | 16.77777666 | 19.74878125 |
| H  | 19.11313680 | 19.49513829 | 22.55291823 |
| H  | 18.94587976 | 21.29811054 | 18.81907856 |
| H  | 24.42600054 | 19.97291107 | 25.67686434 |
| H  | 23.27863956 | 18.73899256 | 25.13525652 |
| H  | 21.58608831 | 19.57043546 | 22.96855703 |
| H  | 23.13630083 | 23.39881770 | 22.58602241 |
| H  | 21.06036769 | 25.10188016 | 17.06559253 |
| H  | 22.27108296 | 26.27419959 | 17.62189623 |
| H  | 22.06413579 | 23.18915994 | 20.00200444 |

|   |             |             |             |
|---|-------------|-------------|-------------|
| H | 19.66234515 | 26.11161009 | 21.69678850 |
| H | 19.10754996 | 12.38139247 | 21.37140133 |
| H | 19.44105898 | 12.51095598 | 19.63924735 |
| H | 20.29484974 | 21.98728034 | 25.37138828 |
| H | 19.03372448 | 21.31003341 | 24.78016211 |
| H | 20.85361265 | 18.63183288 | 14.67095709 |
| H | 18.51681955 | 20.33106019 | 15.03781044 |
| H | 18.66649071 | 14.74506013 | 20.50404353 |
| H | 21.22708205 | 15.58782802 | 24.92317418 |
| H | 23.61836720 | 20.12200339 | 19.35323627 |
| H | 19.31414312 | 15.50715591 | 23.14463452 |
| H | 24.62601053 | 22.13736057 | 24.24383960 |
| H | 18.66889502 | 18.80726456 | 18.42961978 |
| H | 20.28592909 | 26.92574223 | 19.36428602 |
| H | 24.80503594 | 18.98587889 | 24.27482293 |
| H | 22.64782504 | 24.55478491 | 17.53710694 |
| H | 17.25329527 | 22.11834461 | 14.46838996 |
| H | 17.81923069 | 22.84853465 | 15.92966388 |
| H | 19.07309065 | 17.02912685 | 13.95968588 |
| H | 19.59898589 | 16.04094180 | 15.31298009 |

**1BUD**

|   |             |             |             |
|---|-------------|-------------|-------------|
| C | 18.68803791 | 17.12874684 | 20.66665826 |
| C | 18.86568141 | 18.59396888 | 20.55033949 |
| N | 18.82172152 | 19.23410680 | 19.34565266 |
| C | 19.05914930 | 19.56918460 | 21.48562379 |
| C | 18.98444969 | 20.54154290 | 19.57723565 |
| N | 19.12932140 | 20.77159345 | 20.86048971 |
| C | 24.01015487 | 19.47393802 | 24.79909612 |
| C | 23.33935158 | 20.47906762 | 23.93269759 |
| N | 23.82374261 | 21.75098865 | 23.77079869 |
| C | 22.23982662 | 20.40350881 | 23.12580562 |
| C | 23.01602274 | 22.38224079 | 22.89771741 |
| N | 22.04904436 | 21.59286714 | 22.48756953 |
| C | 21.88071956 | 25.26325608 | 17.77059739 |
| C | 21.37231416 | 25.10722728 | 19.15863954 |
| N | 20.58064455 | 26.04779880 | 19.76336206 |

|    |             |             |             |
|----|-------------|-------------|-------------|
| C  | 21.51335141 | 24.10403012 | 20.07244273 |
| C  | 20.27775987 | 25.58748812 | 20.99549393 |
| N  | 20.82715542 | 24.41649299 | 21.20959673 |
| C  | 18.95900000 | 16.84200000 | 15.00700000 |
| C  | 19.28500000 | 18.08200000 | 15.85600000 |
| O  | 18.57693642 | 18.31976438 | 16.82613296 |
| N  | 20.31796470 | 18.85333132 | 15.49696020 |
| C  | 20.74900000 | 19.98500000 | 16.29900000 |
| C  | 20.08300000 | 21.30600000 | 15.94200000 |
| O  | 20.57977510 | 22.38084775 | 16.26417304 |
| C  | 22.27346737 | 20.09922167 | 16.30880157 |
| C  | 22.94776620 | 18.88373427 | 16.93401852 |
| S  | 22.21656135 | 18.36451142 | 18.53066934 |
| C  | 22.61428608 | 19.77654094 | 19.58202600 |
| N  | 18.93376144 | 21.22665370 | 15.26496259 |
| C  | 18.13200000 | 22.40400000 | 15.00800000 |
| Zn | 19.91900000 | 22.36800000 | 22.18600000 |
| O  | 19.59172904 | 22.13415396 | 24.73364401 |
| H  | 17.91682646 | 16.59246397 | 15.24493219 |
| H  | 22.54770572 | 20.99006481 | 16.87500878 |
| H  | 22.65014990 | 20.22548473 | 15.29181952 |
| H  | 24.00204244 | 19.09399794 | 17.10958687 |
| H  | 22.85717002 | 18.00062779 | 16.30419716 |
| H  | 21.89083359 | 20.57407135 | 19.43141549 |
| H  | 22.55431728 | 19.42518366 | 20.60761753 |
| H  | 20.42406850 | 19.77301123 | 17.32821112 |
| H  | 18.72733100 | 23.11783624 | 14.43078345 |
| H  | 18.03299056 | 16.91937220 | 21.51586770 |
| H  | 18.21133082 | 16.77777666 | 19.74878125 |
| H  | 19.11313680 | 19.49513829 | 22.55291823 |
| H  | 18.94587976 | 21.29811054 | 18.81907856 |
| H  | 24.42600054 | 19.97291107 | 25.67686434 |
| H  | 23.27863956 | 18.73899256 | 25.13525652 |
| H  | 21.58608831 | 19.57043546 | 22.96855703 |
| H  | 23.13630083 | 23.39881770 | 22.58602241 |
| H  | 21.06036769 | 25.10188016 | 17.06559253 |
| H  | 22.27108296 | 26.27419959 | 17.62189623 |
| H  | 22.06413579 | 23.18915994 | 20.00200444 |

|   |             |             |             |
|---|-------------|-------------|-------------|
| H | 19.66234515 | 26.11161009 | 21.69678850 |
| H | 20.29484974 | 21.98728034 | 25.37138828 |
| H | 19.03372448 | 21.31003341 | 24.78016211 |
| H | 20.85361265 | 18.63183288 | 14.67095709 |
| H | 18.51681955 | 20.33106019 | 15.03781044 |
| H | 23.61836720 | 20.12200339 | 19.35323627 |
| H | 24.62601053 | 22.13736057 | 24.24383960 |
| H | 18.66889502 | 18.80726456 | 18.42961978 |
| H | 20.28592909 | 26.92574223 | 19.36428602 |
| H | 19.59898589 | 16.04094180 | 15.31298009 |
| H | 19.07309065 | 17.02912685 | 13.95968588 |
| H | 17.25329527 | 22.11834461 | 14.46838996 |
| H | 17.81923069 | 22.84853465 | 15.92966388 |
| H | 22.64782504 | 24.55478491 | 17.53710694 |
| H | 19.59932817 | 16.58296625 | 20.79539683 |
| H | 24.80503594 | 18.98587889 | 24.27482293 |

**IIAG (includes GLU)**

|   |             |             |             |
|---|-------------|-------------|-------------|
| C | 17.27698722 | 12.80647861 | 24.52872851 |
| C | 17.14820905 | 11.44247254 | 23.90265669 |
| O | 16.09925603 | 10.81022875 | 23.86574642 |
| N | 18.29779047 | 10.95146286 | 23.39467260 |
| C | 18.32683704 | 9.71141629  | 22.64170211 |
| C | 17.46448211 | 8.65804670  | 23.34365313 |
| O | 16.63206659 | 8.00746577  | 22.72780481 |
| C | 19.76193918 | 9.18110093  | 22.48617252 |
| C | 19.75801683 | 7.91687784  | 21.69444721 |
| N | 20.08780362 | 7.88307289  | 20.36647574 |
| C | 19.40640173 | 6.63298016  | 22.02102632 |
| C | 19.92707197 | 6.61807889  | 19.94698123 |
| N | 19.52136909 | 5.84070976  | 20.92310688 |
| N | 17.73917884 | 8.48833891  | 24.63892606 |
| C | 17.06455778 | 7.52462969  | 25.48142559 |
| C | 17.93289433 | 7.13765861  | 26.67304698 |
| C | 19.14725124 | 6.30263219  | 26.26342801 |
| C | 18.70610573 | 4.87762243  | 25.82492372 |
| O | 18.37952755 | 4.74016491  | 24.62327381 |

|    |             |             |             |
|----|-------------|-------------|-------------|
| O  | 18.70411137 | 3.98609497  | 26.69338133 |
| C  | 13.83149290 | 6.32918386  | 23.50529590 |
| C  | 14.54911860 | 5.75678069  | 22.33327965 |
| N  | 14.05210367 | 5.75059753  | 21.05719296 |
| C  | 15.77344754 | 5.15078061  | 22.24711370 |
| C  | 14.97585883 | 5.16529527  | 20.26742653 |
| N  | 16.01976118 | 4.79076921  | 20.96111565 |
| C  | 16.45806460 | 4.40647129  | 14.75993067 |
| C  | 16.59062733 | 3.84395010  | 16.12896700 |
| N  | 15.81721099 | 2.82272571  | 16.61386679 |
| C  | 17.39804294 | 4.21276913  | 17.17047008 |
| C  | 16.18170873 | 2.61615649  | 17.89676015 |
| N  | 17.13476110 | 3.43638612  | 18.25294199 |
| C  | 21.19126860 | 11.71989736 | 17.00526384 |
| C  | 20.59331537 | 10.34206178 | 17.29762925 |
| O  | 20.84927515 | 9.73550186  | 18.32420270 |
| N  | 19.74095264 | 9.89634029  | 16.35701781 |
| C  | 19.02163628 | 8.64950047  | 16.46368930 |
| C  | 19.53154584 | 7.56924881  | 15.50143052 |
| O  | 18.76354496 | 6.82450241  | 14.90147394 |
| C  | 17.51009292 | 8.83315579  | 16.31804193 |
| C  | 16.91331662 | 9.76335915  | 17.36274634 |
| S  | 17.41064520 | 9.36076931  | 19.07704508 |
| C  | 16.69468942 | 7.71695667  | 19.29046682 |
| N  | 20.86216657 | 7.50434873  | 15.36004487 |
| C  | 21.47418826 | 6.24101447  | 14.99102283 |
| Zn | 18.30308907 | 3.73510304  | 20.52418573 |
| O  | 18.31989794 | 2.62583857  | 22.93288290 |
| H  | 16.34806990 | 13.06412630 | 25.02857125 |
| H  | 17.32923077 | 6.55269163  | 27.37067863 |
| H  | 18.26236055 | 8.04302058  | 27.19163111 |
| H  | 19.82462707 | 6.19130343  | 27.11164418 |
| H  | 19.67320838 | 6.77300462  | 25.43073591 |
| H  | 16.85370280 | 6.64143638  | 24.87237963 |
| H  | 22.02586109 | 11.84578591 | 17.70954164 |
| H  | 17.05604980 | 7.84494763  | 16.40804719 |
| H  | 17.27547147 | 9.22177173  | 15.32444015 |
| H  | 15.82457657 | 9.73211471  | 17.32122620 |

|   |             |             |             |
|---|-------------|-------------|-------------|
| H | 17.24624995 | 10.78975530 | 17.22062454 |
| H | 16.66880144 | 7.52325209  | 20.35956174 |
| H | 15.68796680 | 7.70133492  | 18.88224195 |
| H | 17.31184861 | 6.96255571  | 18.80979384 |
| H | 19.23598430 | 8.26084569  | 17.46914001 |
| H | 21.08706624 | 5.94626147  | 14.00877402 |
| H | 17.89138599 | 9.86380426  | 21.64346999 |
| H | 20.19391834 | 8.99549710  | 23.47119398 |
| H | 20.36299205 | 9.92596325  | 21.96225734 |
| H | 19.08655281 | 6.22321682  | 22.95880389 |
| H | 20.12319525 | 6.28131315  | 18.95021908 |
| H | 13.08292215 | 5.62892285  | 23.88621535 |
| H | 14.56944710 | 6.48153017  | 24.29415659 |
| H | 16.48529404 | 4.95224905  | 23.02198341 |
| H | 14.85919771 | 5.05665061  | 19.20836471 |
| H | 17.42631533 | 4.79783502  | 14.45030956 |
| H | 16.12714147 | 3.64216931  | 14.05551217 |
| H | 18.15661554 | 4.96812360  | 17.20017053 |
| H | 15.74812004 | 1.87298559  | 18.53341382 |
| H | 19.09836339 | 2.11417403  | 23.16634221 |
| H | 17.47790092 | 13.54341522 | 23.75453764 |
| H | 18.09247095 | 12.81981169 | 25.24655988 |
| H | 18.40589550 | 9.09587546  | 25.09093930 |
| H | 19.11301643 | 11.54512196 | 23.34449131 |
| H | 21.44692645 | 8.13539533  | 15.89796906 |
| H | 19.58487059 | 10.45180756 | 15.52924231 |
| H | 18.29019367 | 3.37300415  | 23.57210020 |
| H | 16.11158477 | 7.94298433  | 25.83125960 |
| H | 13.17517950 | 6.15008484  | 20.76490138 |
| H | 20.37248518 | 8.66522143  | 19.78308709 |
| H | 15.10332492 | 2.32780975  | 16.10259718 |
| H | 13.33804400 | 7.25540115  | 23.29665816 |
| H | 15.75466672 | 5.21277645  | 14.75808338 |
| H | 21.14375999 | 5.52721488  | 15.71642430 |
| H | 22.53742171 | 6.35976188  | 14.97275554 |
| H | 21.55661584 | 11.74001867 | 15.99977066 |
| H | 20.47057512 | 12.49304863 | 17.17181122 |

**1IAG**

|    |             |             |             |
|----|-------------|-------------|-------------|
| C  | 19.76193918 | 9.18110093  | 22.48617252 |
| C  | 19.75801683 | 7.91687784  | 21.69444721 |
| N  | 20.08780362 | 7.88307289  | 20.36647574 |
| C  | 19.40640173 | 6.63298016  | 22.02102632 |
| C  | 19.92707197 | 6.61807889  | 19.94698123 |
| N  | 19.52136909 | 5.84070976  | 20.92310688 |
| C  | 13.83149290 | 6.32918386  | 23.50529590 |
| C  | 14.54911860 | 5.75678069  | 22.33327965 |
| N  | 14.05210367 | 5.75059753  | 21.05719296 |
| C  | 15.77344754 | 5.15078061  | 22.24711370 |
| C  | 14.97585883 | 5.16529527  | 20.26742653 |
| N  | 16.01976118 | 4.79076921  | 20.96111565 |
| C  | 16.45806460 | 4.40647129  | 14.75993067 |
| C  | 16.59062733 | 3.84395010  | 16.12896700 |
| N  | 15.81721099 | 2.82272571  | 16.61386679 |
| C  | 17.39804294 | 4.21276913  | 17.17047008 |
| C  | 16.18170873 | 2.61615649  | 17.89676015 |
| N  | 17.13476110 | 3.43638612  | 18.25294199 |
| C  | 21.19126860 | 11.71989736 | 17.00526384 |
| C  | 20.59331537 | 10.34206178 | 17.29762925 |
| O  | 20.84927515 | 9.73550186  | 18.32420270 |
| N  | 19.74095264 | 9.89634029  | 16.35701781 |
| C  | 19.02163628 | 8.64950047  | 16.46368930 |
| C  | 19.53154584 | 7.56924881  | 15.50143052 |
| O  | 18.76354496 | 6.82450241  | 14.90147394 |
| C  | 17.51009292 | 8.83315579  | 16.31804193 |
| C  | 16.91331662 | 9.76335915  | 17.36274634 |
| S  | 17.41064520 | 9.36076931  | 19.07704508 |
| C  | 16.69468942 | 7.71695667  | 19.29046682 |
| N  | 20.86216657 | 7.50434873  | 15.36004487 |
| C  | 21.47418826 | 6.24101447  | 14.99102283 |
| Zn | 18.30308907 | 3.73510304  | 20.52418573 |
| O  | 18.31989794 | 2.62583857  | 22.93288290 |
| H  | 22.02586109 | 11.84578591 | 17.70954164 |
| H  | 17.05604980 | 7.84494763  | 16.40804719 |
| H  | 17.27547147 | 9.22177173  | 15.32444015 |

|   |             |             |             |
|---|-------------|-------------|-------------|
| H | 15.82457657 | 9.73211471  | 17.32122620 |
| H | 17.24624995 | 10.78975530 | 17.22062454 |
| H | 16.66880144 | 7.52325209  | 20.35956174 |
| H | 15.68796680 | 7.70133492  | 18.88224195 |
| H | 17.31184861 | 6.96255571  | 18.80979384 |
| H | 19.23598430 | 8.26084569  | 17.46914001 |
| H | 21.08706624 | 5.94626147  | 14.00877402 |
| H | 20.19391834 | 8.99549710  | 23.47119398 |
| H | 20.36299205 | 9.92596325  | 21.96225734 |
| H | 19.08655281 | 6.22321682  | 22.95880389 |
| H | 20.12319525 | 6.28131315  | 18.95021908 |
| H | 13.08292215 | 5.62892285  | 23.88621535 |
| H | 14.56944710 | 6.48153017  | 24.29415659 |
| H | 16.48529404 | 4.95224905  | 23.02198341 |
| H | 14.85919771 | 5.05665061  | 19.20836471 |
| H | 17.42631533 | 4.79783502  | 14.45030956 |
| H | 16.12714147 | 3.64216931  | 14.05551217 |
| H | 18.15661554 | 4.96812360  | 17.20017053 |
| H | 15.74812004 | 1.87298559  | 18.53341382 |
| H | 19.09836339 | 2.11417403  | 23.16634221 |
| H | 21.44692645 | 8.13539533  | 15.89796906 |
| H | 19.58487059 | 10.45180756 | 15.52924231 |
| H | 18.29019367 | 3.37300415  | 23.57210020 |
| H | 13.17517950 | 6.15008484  | 20.76490138 |
| H | 20.37248518 | 8.66522143  | 19.78308709 |
| H | 15.10332492 | 2.32780975  | 16.10259718 |
| H | 13.33804400 | 7.25540115  | 23.29665816 |
| H | 15.75466672 | 5.21277645  | 14.75808338 |
| H | 18.76342015 | 9.55008510  | 22.59438729 |
| H | 22.53742171 | 6.35976188  | 14.97275554 |
| H | 21.14375999 | 5.52721488  | 15.71642430 |
| H | 21.55661584 | 11.74001867 | 15.99977066 |
| H | 20.47057512 | 12.49304863 | 17.17181122 |

**1WNI (includes GLU)**

|   |             |             |            |
|---|-------------|-------------|------------|
| C | 19.10315681 | 51.65126719 | 7.97501566 |
| C | 18.75969344 | 50.89864026 | 6.71497855 |

|   |             |             |             |
|---|-------------|-------------|-------------|
| O | 19.53200427 | 50.76194713 | 5.77636452  |
| N | 17.50310299 | 50.40277313 | 6.69262986  |
| C | 17.03250591 | 49.51810836 | 5.64334473  |
| C | 17.48665733 | 50.01535453 | 4.26858952  |
| O | 17.94752104 | 49.24066082 | 3.43802598  |
| C | 15.49673850 | 49.41568616 | 5.68079963  |
| C | 14.99378766 | 48.49781689 | 4.62084966  |
| N | 14.79624519 | 47.15928396 | 4.82764025  |
| C | 14.67169506 | 48.72044131 | 3.30894593  |
| C | 14.36793310 | 46.63408114 | 3.66934420  |
| N | 14.28150949 | 47.55257703 | 2.73529425  |
| N | 17.28049014 | 51.31039621 | 4.03277304  |
| C | 17.67999400 | 51.95215162 | 2.79897832  |
| C | 16.89881165 | 53.23618335 | 2.55153863  |
| C | 15.40378891 | 52.98555814 | 2.39759432  |
| C | 15.05214896 | 52.09296153 | 1.17791683  |
| O | 13.99087986 | 51.42963112 | 1.29134283  |
| O | 15.80446324 | 52.09715576 | 0.18923287  |
| C | 19.59638582 | 49.41180729 | 0.30013378  |
| C | 18.35368427 | 48.59391555 | 0.41547540  |
| N | 18.33536298 | 47.26953222 | 0.74364471  |
| C | 17.04584133 | 48.92703540 | 0.17397253  |
| C | 17.05696221 | 46.86243301 | 0.70139626  |
| N | 16.25375534 | 47.83544107 | 0.34961548  |
| C | 16.64885296 | 42.17924494 | 0.23995320  |
| C | 15.90565930 | 43.38164109 | -0.22503216 |
| N | 16.08453961 | 43.94502147 | -1.46127713 |
| C | 14.96075419 | 44.15692214 | 0.39186590  |
| C | 15.26380362 | 45.01019603 | -1.54406615 |
| N | 14.57135918 | 45.16050678 | -0.44256603 |
| C | 14.94921705 | 44.00580154 | 9.02827092  |
| C | 15.19480720 | 44.23538399 | 7.53560115  |
| O | 14.81441366 | 45.24788892 | 6.97481752  |
| N | 15.89223741 | 43.26069516 | 6.92044148  |
| C | 16.26850350 | 43.33114027 | 5.52839282  |
| C | 15.48812291 | 42.36371261 | 4.63314806  |
| O | 15.92915264 | 41.99810005 | 3.55031563  |
| C | 17.77516288 | 43.15121339 | 5.32322509  |

|    |             |             |             |
|----|-------------|-------------|-------------|
| C  | 18.60934845 | 44.25109533 | 5.96369331  |
| S  | 17.99328579 | 45.93898166 | 5.61722052  |
| C  | 18.00012397 | 45.96269524 | 3.81014676  |
| N  | 14.32666090 | 41.92395927 | 5.13504946  |
| C  | 13.34292161 | 41.33501911 | 4.25101499  |
| Zn | 13.94560149 | 47.44539495 | 0.40598698  |
| O  | 13.69503683 | 49.69818602 | -0.68890265 |
| H  | 20.05999760 | 52.14858738 | 7.84737729  |
| H  | 15.06279406 | 50.40491771 | 5.52677313  |
| H  | 15.19312338 | 49.03519046 | 6.65762627  |
| H  | 14.67369502 | 49.63569818 | 2.75132127  |
| H  | 14.09980579 | 45.60523806 | 3.53967269  |
| H  | 17.46462652 | 48.51497658 | 5.77331926  |
| H  | 17.26943363 | 53.67704326 | 1.62480250  |
| H  | 17.07596938 | 53.94149429 | 3.36727068  |
| H  | 14.88067794 | 53.93320130 | 2.24371068  |
| H  | 14.97662336 | 52.50718152 | 3.28077706  |
| H  | 17.49761790 | 51.24697528 | 1.98369920  |
| H  | 14.18179625 | 44.73552845 | 9.32190955  |
| H  | 17.95960700 | 43.13295857 | 4.24827045  |
| H  | 18.09035538 | 42.18892833 | 5.73226225  |
| H  | 19.64008066 | 44.19739218 | 5.61303562  |
| H  | 18.59910132 | 44.18235821 | 7.04987118  |
| H  | 17.87080660 | 47.00080224 | 3.51591263  |
| H  | 18.94778975 | 45.58476918 | 3.43625788  |
| H  | 17.17132473 | 45.37473317 | 3.42498964  |
| H  | 15.97536478 | 44.33608343 | 5.19324270  |
| H  | 13.85187434 | 40.59706083 | 3.62228741  |
| H  | 19.86953630 | 49.51507841 | -0.75470191 |
| H  | 19.39136604 | 50.41430610 | 0.68178573  |
| H  | 19.11610483 | 46.67641946 | 1.00105477  |
| H  | 16.64063215 | 49.88311390 | -0.09485338 |
| H  | 16.74970422 | 45.86458442 | 0.93402724  |
| H  | 16.07638940 | 41.71235324 | 1.04040042  |
| H  | 16.76767695 | 41.46838883 | -0.58001267 |
| H  | 14.53291682 | 44.05131064 | 1.36808565  |
| H  | 15.18303817 | 45.64260026 | -2.40373631 |
| H  | 13.75357622 | 50.35061049 | 0.06029948  |

|   |             |             |             |
|---|-------------|-------------|-------------|
| H | 14.38415497 | 49.96531818 | -1.30238399 |
| H | 19.17696217 | 50.95149060 | 8.80421744  |
| H | 18.33650012 | 52.38689674 | 8.20172289  |
| H | 18.75484703 | 52.17269293 | 2.83635932  |
| H | 16.94345139 | 50.44814355 | 7.53198780  |
| H | 16.96158157 | 51.91155384 | 4.77722368  |
| H | 16.19567158 | 42.45396759 | 7.44542112  |
| H | 13.94239394 | 42.41041704 | 5.94280476  |
| H | 14.91086425 | 46.64737925 | 5.69808291  |
| H | 16.71320326 | 43.61232620 | -2.17556863 |
| H | 12.56281417 | 40.87652806 | 4.82208271  |
| H | 12.95812685 | 42.11716430 | 3.63046532  |
| H | 14.58753832 | 43.01331163 | 9.19871818  |
| H | 15.83982739 | 44.18754998 | 9.59278906  |
| H | 17.61593214 | 42.42379544 | 0.62706161  |
| H | 20.43737827 | 48.99632918 | 0.81492465  |

**1WNI**

|   |             |             |             |
|---|-------------|-------------|-------------|
| C | 15.49673850 | 49.41568616 | 5.68079963  |
| C | 14.99378766 | 48.49781689 | 4.62084966  |
| N | 14.79624519 | 47.15928396 | 4.82764025  |
| C | 14.67169506 | 48.72044131 | 3.30894593  |
| C | 14.36793310 | 46.63408114 | 3.66934420  |
| N | 14.28150949 | 47.55257703 | 2.73529425  |
| C | 19.59638582 | 49.41180729 | 0.30013378  |
| C | 18.35368427 | 48.59391555 | 0.41547540  |
| N | 18.33536298 | 47.26953222 | 0.74364471  |
| C | 17.04584133 | 48.92703540 | 0.17397253  |
| C | 17.05696221 | 46.86243301 | 0.70139626  |
| N | 16.25375534 | 47.83544107 | 0.34961548  |
| C | 16.64885296 | 42.17924494 | 0.23995320  |
| C | 15.90565930 | 43.38164109 | -0.22503216 |
| N | 16.08453961 | 43.94502147 | -1.46127713 |
| C | 14.96075419 | 44.15692214 | 0.39186590  |
| C | 15.26380362 | 45.01019603 | -1.54406615 |
| N | 14.57135918 | 45.16050678 | -0.44256603 |
| C | 14.94921705 | 44.00580154 | 9.02827092  |

|    |             |             |             |
|----|-------------|-------------|-------------|
| C  | 15.19480720 | 44.23538399 | 7.53560115  |
| O  | 14.81441366 | 45.24788892 | 6.97481752  |
| N  | 15.89223741 | 43.26069516 | 6.92044148  |
| C  | 16.26850350 | 43.33114027 | 5.52839282  |
| C  | 15.48812291 | 42.36371261 | 4.63314806  |
| O  | 15.92915264 | 41.99810005 | 3.55031563  |
| C  | 17.77516288 | 43.15121339 | 5.32322509  |
| C  | 18.60934845 | 44.25109533 | 5.96369331  |
| S  | 17.99328579 | 45.93898166 | 5.61722052  |
| C  | 18.00012397 | 45.96269524 | 3.81014676  |
| N  | 14.32666090 | 41.92395927 | 5.13504946  |
| C  | 13.34292161 | 41.33501911 | 4.25101499  |
| Zn | 13.94560149 | 47.44539495 | 0.40598698  |
| O  | 13.69503683 | 49.69818602 | -0.68890265 |
| H  | 15.06279406 | 50.40491771 | 5.52677313  |
| H  | 15.19312338 | 49.03519046 | 6.65762627  |
| H  | 14.67369502 | 49.63569818 | 2.75132127  |
| H  | 14.09980579 | 45.60523806 | 3.53967269  |
| H  | 14.18179625 | 44.73552845 | 9.32190955  |
| H  | 17.95960700 | 43.13295857 | 4.24827045  |
| H  | 18.09035538 | 42.18892833 | 5.73226225  |
| H  | 19.64008066 | 44.19739218 | 5.61303562  |
| H  | 18.59910132 | 44.18235821 | 7.04987118  |
| H  | 17.87080660 | 47.00080224 | 3.51591263  |
| H  | 18.94778975 | 45.58476918 | 3.43625788  |
| H  | 17.17132473 | 45.37473317 | 3.42498964  |
| H  | 15.97536478 | 44.33608343 | 5.19324270  |
| H  | 13.85187434 | 40.59706083 | 3.62228741  |
| H  | 19.86953630 | 49.51507841 | -0.75470191 |
| H  | 19.39136604 | 50.41430610 | 0.68178573  |
| H  | 19.11610483 | 46.67641946 | 1.00105477  |
| H  | 16.64063215 | 49.88311390 | -0.09485338 |
| H  | 16.74970422 | 45.86458442 | 0.93402724  |
| H  | 16.07638940 | 41.71235324 | 1.04040042  |
| H  | 16.76767695 | 41.46838883 | -0.58001267 |
| H  | 14.53291682 | 44.05131064 | 1.36808565  |
| H  | 15.18303817 | 45.64260026 | -2.40373631 |
| H  | 13.75357622 | 50.35061049 | 0.06029948  |

|   |             |             |             |
|---|-------------|-------------|-------------|
| H | 14.38415497 | 49.96531818 | -1.30238399 |
| H | 16.19567158 | 42.45396759 | 7.44542112  |
| H | 13.94239394 | 42.41041704 | 5.94280476  |
| H | 14.91086425 | 46.64737925 | 5.69808291  |
| H | 16.71320326 | 43.61232620 | -2.17556863 |
| H | 17.61593214 | 42.42379544 | 0.62706161  |
| H | 12.95812685 | 42.11716430 | 3.63046532  |
| H | 12.56281417 | 40.87652806 | 4.82208271  |
| H | 20.43737827 | 48.99632918 | 0.81492465  |
| H | 16.56405091 | 49.48686653 | 5.65476960  |
| H | 15.83982739 | 44.18754998 | 9.59278906  |
| H | 14.58753832 | 43.01331163 | 9.19871818  |

**2DW2 (includes GLU)**

|   |             |             |             |
|---|-------------|-------------|-------------|
| C | 83.46072709 | 3.37260557  | 28.08165233 |
| C | 82.47756350 | 4.36788376  | 27.52195872 |
| O | 81.56081832 | 4.86042457  | 28.17096739 |
| N | 82.66829239 | 4.66655819  | 26.21479380 |
| C | 81.88878441 | 5.69450939  | 25.55058407 |
| C | 80.40735004 | 5.52523836  | 25.89937387 |
| O | 79.72234884 | 6.47135532  | 26.27692691 |
| C | 82.10998692 | 5.61525069  | 24.02983644 |
| C | 81.33723623 | 6.65022858  | 23.28538493 |
| N | 81.92474687 | 7.49678792  | 22.38459047 |
| C | 80.01377146 | 6.98545382  | 23.29309334 |
| C | 80.97458420 | 8.30435619  | 21.89425019 |
| N | 79.79555478 | 8.02049425  | 22.43089576 |
| N | 79.91702707 | 4.30004075  | 25.68009269 |
| C | 78.52255151 | 3.95956750  | 25.85049494 |
| C | 78.03094405 | 3.01302999  | 24.75668332 |
| C | 78.23954243 | 3.54816437  | 23.34284629 |
| C | 77.45839867 | 4.82997095  | 22.99915909 |
| O | 76.68620472 | 5.34172072  | 23.82128397 |
| O | 77.68464977 | 5.29364640  | 21.84243609 |
| C | 77.07263506 | 8.07397405  | 27.84085479 |
| C | 77.32898610 | 8.74695154  | 26.53991592 |
| N | 77.61317859 | 10.08115110 | 26.39771689 |

|    |             |             |             |
|----|-------------|-------------|-------------|
| C  | 77.32529186 | 8.23542312  | 25.27585415 |
| C  | 77.78266761 | 10.33461884 | 25.08503091 |
| N  | 77.60845684 | 9.22401360  | 24.37552918 |
| C  | 79.22915781 | 13.83699922 | 20.56297645 |
| C  | 78.47338257 | 12.59517309 | 20.85252245 |
| N  | 77.10372451 | 12.47759538 | 20.81366974 |
| C  | 78.93908380 | 11.38929984 | 21.29184006 |
| C  | 76.78873390 | 11.22516117 | 21.22300400 |
| N  | 77.89591823 | 10.54248650 | 21.51856017 |
| C  | 86.89524964 | 8.72990783  | 22.62859726 |
| C  | 85.40545591 | 9.02530382  | 22.45176740 |
| O  | 84.61846778 | 8.14236553  | 22.11558220 |
| N  | 85.04032427 | 10.28843750 | 22.75043205 |
| C  | 83.68186335 | 10.77073467 | 22.72511718 |
| C  | 83.32215378 | 11.58297448 | 21.48513789 |
| O  | 82.26856007 | 12.25310078 | 21.45464537 |
| C  | 83.36508531 | 11.58966908 | 23.98387697 |
| C  | 83.54953445 | 10.79992956 | 25.27027530 |
| S  | 82.67763350 | 9.19668198  | 25.27674465 |
| C  | 80.95328893 | 9.73581768  | 25.37095672 |
| N  | 84.19518528 | 11.57831982 | 20.44123594 |
| C  | 83.66204790 | 11.94986109 | 19.13940174 |
| Zn | 78.04224624 | 8.87442202  | 22.48305246 |
| O  | 76.65501444 | 7.60503697  | 21.88646174 |
| H  | 83.12693890 | 3.04947608  | 29.06313796 |
| H  | 76.96470753 | 2.84892515  | 24.91860842 |
| H  | 78.54353633 | 2.05246764  | 24.84877025 |
| H  | 77.93487859 | 2.79552048  | 22.61151758 |
| H  | 79.29163048 | 3.77374532  | 23.15429193 |
| H  | 77.95433618 | 4.89082701  | 25.81505723 |
| H  | 87.09363358 | 7.85103859  | 21.99709481 |
| H  | 82.33532141 | 11.94013265 | 23.89496900 |
| H  | 84.01260642 | 12.46947191 | 24.01673700 |
| H  | 83.19484487 | 11.36980311 | 26.12870554 |
| H  | 84.59559618 | 10.53842365 | 25.42263127 |
| H  | 80.35835891 | 8.83644987  | 25.50391930 |
| H  | 80.66800524 | 10.23860070 | 24.45068724 |
| H  | 80.83162286 | 10.39696075 | 26.22438953 |

|   |             |             |             |
|---|-------------|-------------|-------------|
| H | 83.03732140 | 9.88123650  | 22.71468016 |
| H | 83.38159981 | 13.00819105 | 19.18960902 |
| H | 82.18929391 | 6.69112446  | 25.90257754 |
| H | 81.82543284 | 4.62096586  | 23.67497561 |
| H | 83.16983442 | 5.77297577  | 23.82112227 |
| H | 79.20840090 | 6.56019830  | 23.85210929 |
| H | 81.15897788 | 9.03724347  | 21.13265357 |
| H | 76.08056428 | 8.33576307  | 28.21906993 |
| H | 77.09671015 | 6.99787869  | 27.66378951 |
| H | 77.11466865 | 7.23143867  | 24.96360707 |
| H | 78.03718444 | 11.29573952 | 24.68314316 |
| H | 80.06181538 | 13.60144228 | 19.90124613 |
| H | 78.59274424 | 14.59100960 | 20.09962935 |
| H | 79.95926647 | 11.10002694 | 21.44883013 |
| H | 75.79476589 | 10.83699004 | 21.28695512 |
| H | 77.06660779 | 6.65165522  | 21.77821222 |
| H | 75.90793418 | 7.44477470  | 22.47643097 |
| H | 83.55136205 | 2.51245509  | 27.42407589 |
| H | 84.43620968 | 3.84412187  | 28.18006861 |
| H | 78.36892557 | 3.49349072  | 26.83097563 |
| H | 83.50659632 | 4.34796726  | 25.75238342 |
| H | 82.92474311 | 7.58439628  | 22.18834737 |
| H | 77.69756107 | 10.75061421 | 27.14517222 |
| H | 76.45068317 | 13.19309885 | 20.53819759 |
| H | 80.54536965 | 3.54834037  | 25.44110308 |
| H | 84.88173302 | 10.82797958 | 20.41489102 |
| H | 85.76604707 | 10.96137899 | 22.94555758 |
| H | 77.78240777 | 8.32131847  | 28.60239496 |
| H | 79.64994825 | 14.23477126 | 21.46276132 |
| H | 87.47147852 | 9.56369348  | 22.28557864 |
| H | 87.13481433 | 8.49439957  | 23.64449323 |
| H | 84.40452924 | 11.79799384 | 18.38404898 |
| H | 82.78112437 | 11.37239332 | 18.95124032 |

**2DW2**

|   |             |            |             |
|---|-------------|------------|-------------|
| C | 81.88878441 | 5.69450939 | 25.55058407 |
| C | 82.10998692 | 5.61525069 | 24.02983644 |

|    |             |             |             |
|----|-------------|-------------|-------------|
| C  | 81.33723623 | 6.65022858  | 23.28538493 |
| N  | 81.92474687 | 7.49678792  | 22.38459047 |
| C  | 80.01377146 | 6.98545382  | 23.29309334 |
| C  | 80.97458420 | 8.30435619  | 21.89425019 |
| N  | 79.79555478 | 8.02049425  | 22.43089576 |
| C  | 77.07263506 | 8.07397405  | 27.84085479 |
| C  | 77.32898610 | 8.74695154  | 26.53991592 |
| N  | 77.61317859 | 10.08115110 | 26.39771689 |
| C  | 77.32529186 | 8.23542312  | 25.27585415 |
| C  | 77.78266761 | 10.33461884 | 25.08503091 |
| N  | 77.60845684 | 9.22401360  | 24.37552918 |
| C  | 79.22915781 | 13.83699922 | 20.56297645 |
| C  | 78.47338257 | 12.59517309 | 20.85252245 |
| N  | 77.10372451 | 12.47759538 | 20.81366974 |
| C  | 78.93908380 | 11.38929984 | 21.29184006 |
| C  | 76.78873390 | 11.22516117 | 21.22300400 |
| N  | 77.89591823 | 10.54248650 | 21.51856017 |
| C  | 86.89524964 | 8.72990783  | 22.62859726 |
| C  | 85.40545591 | 9.02530382  | 22.45176740 |
| O  | 84.61846778 | 8.14236553  | 22.11558220 |
| N  | 85.04032427 | 10.28843750 | 22.75043205 |
| C  | 83.68186335 | 10.77073467 | 22.72511718 |
| C  | 83.32215378 | 11.58297448 | 21.48513789 |
| O  | 82.26856007 | 12.25310078 | 21.45464537 |
| C  | 83.36508531 | 11.58966908 | 23.98387697 |
| C  | 83.54953445 | 10.79992956 | 25.27027530 |
| S  | 82.67763350 | 9.19668198  | 25.27674465 |
| C  | 80.95328893 | 9.73581768  | 25.37095672 |
| N  | 84.19518528 | 11.57831982 | 20.44123594 |
| C  | 83.66204790 | 11.94986109 | 19.13940174 |
| Zn | 78.04224624 | 8.87442202  | 22.48305246 |
| O  | 76.65501444 | 7.60503697  | 21.88646174 |
| H  | 87.09363358 | 7.85103859  | 21.99709481 |
| H  | 82.33532141 | 11.94013265 | 23.89496900 |
| H  | 84.01260642 | 12.46947191 | 24.01673700 |
| H  | 83.19484487 | 11.36980311 | 26.12870554 |
| H  | 84.59559618 | 10.53842365 | 25.42263127 |
| H  | 80.35835891 | 8.83644987  | 25.50391930 |

|   |             |             |             |
|---|-------------|-------------|-------------|
| H | 80.66800524 | 10.23860070 | 24.45068724 |
| H | 80.83162286 | 10.39696075 | 26.22438953 |
| H | 83.03732140 | 9.88123650  | 22.71468016 |
| H | 83.38159981 | 13.00819105 | 19.18960902 |
| H | 81.82543284 | 4.62096586  | 23.67497561 |
| H | 83.16983442 | 5.77297577  | 23.82112227 |
| H | 79.20840090 | 6.56019830  | 23.85210929 |
| H | 81.15897788 | 9.03724347  | 21.13265357 |
| H | 76.08056428 | 8.33576307  | 28.21906993 |
| H | 77.09671015 | 6.99787869  | 27.66378951 |
| H | 77.11466865 | 7.23143867  | 24.96360707 |
| H | 78.03718444 | 11.29573952 | 24.68314316 |
| H | 80.06181538 | 13.60144228 | 19.90124613 |
| H | 78.59274424 | 14.59100960 | 20.09962935 |
| H | 79.95926647 | 11.10002694 | 21.44883013 |
| H | 75.79476589 | 10.83699004 | 21.28695512 |
| H | 77.06660779 | 6.65165522  | 21.77821222 |
| H | 75.90793418 | 7.44477470  | 22.47643097 |
| H | 82.92474311 | 7.58439628  | 22.18834737 |
| H | 77.69756107 | 10.75061421 | 27.14517222 |
| H | 76.45068317 | 13.19309885 | 20.53819759 |
| H | 84.88173302 | 10.82797958 | 20.41489102 |
| H | 85.76604707 | 10.96137899 | 22.94555758 |
| H | 79.64994825 | 14.23477126 | 21.46276132 |
| H | 77.78240777 | 8.32131847  | 28.60239496 |
| H | 80.85364473 | 5.57623270  | 25.79429798 |
| H | 82.46359883 | 4.93649126  | 26.04037679 |
| H | 87.13481433 | 8.49439957  | 23.64449323 |
| H | 87.47147852 | 9.56369348  | 22.28557864 |
| H | 82.78112437 | 11.37239332 | 18.95124032 |
| H | 84.40452924 | 11.79799384 | 18.38404898 |

**ZERO (includes GLU)**

|   |             |             |             |
|---|-------------|-------------|-------------|
| C | 32.12038348 | 14.25953376 | 84.88579020 |
| C | 32.14376691 | 13.89656208 | 86.34849719 |
| O | 31.95279208 | 12.76316470 | 86.76742860 |
| N | 32.36612869 | 14.94254156 | 87.17435206 |

|   |             |             |             |
|---|-------------|-------------|-------------|
| C | 32.58892461 | 14.77520631 | 88.59825440 |
| C | 31.59291542 | 13.77367627 | 89.18775275 |
| O | 31.95900508 | 12.90438927 | 89.97025706 |
| C | 32.46236810 | 16.12834679 | 89.32121786 |
| C | 32.72576321 | 15.98596847 | 90.78024244 |
| N | 33.97415694 | 16.12201248 | 91.32465866 |
| C | 31.89571839 | 15.68978948 | 91.82763124 |
| C | 33.86095959 | 15.91538735 | 92.64489752 |
| N | 32.61694375 | 15.65457338 | 92.97913335 |
| N | 30.32012036 | 13.96607965 | 88.84194208 |
| C | 29.25124969 | 13.09469559 | 89.27912265 |
| C | 27.89769445 | 13.79234794 | 89.23428192 |
| C | 27.84028708 | 15.00727711 | 90.15206310 |
| C | 28.04950059 | 14.65792557 | 91.64900573 |
| O | 28.55143126 | 15.57622673 | 92.34465482 |
| O | 27.70645945 | 13.53830203 | 92.06353531 |
| C | 30.61617766 | 9.98842078  | 91.41257198 |
| C | 31.23896805 | 11.01187848 | 92.30140881 |
| N | 32.54768023 | 10.99652235 | 92.68751912 |
| C | 30.68273768 | 12.08849173 | 92.94208168 |
| C | 32.73658026 | 12.03752894 | 93.51260732 |
| N | 31.62803988 | 12.71104694 | 93.69624676 |
| C | 36.80053853 | 11.82386756 | 96.03419973 |
| C | 35.43535462 | 12.37727174 | 96.24314194 |
| N | 34.47988522 | 11.77663213 | 97.01920213 |
| C | 34.84932324 | 13.51888947 | 95.76669777 |
| C | 33.38320656 | 12.55776411 | 96.98959683 |
| N | 33.57744481 | 13.62002681 | 96.24676896 |
| C | 38.58296445 | 17.50105284 | 89.15730611 |
| C | 37.80435167 | 16.69612093 | 90.19963253 |
| O | 36.60687697 | 16.85514529 | 90.36724908 |
| N | 38.52727880 | 15.75270905 | 90.83321348 |
| C | 37.94604084 | 14.81577316 | 91.76225965 |
| C | 38.37181507 | 15.02446735 | 93.21957205 |
| O | 38.35949923 | 14.09257809 | 94.01916683 |
| C | 38.18156994 | 13.36417051 | 91.33300510 |
| C | 37.56713946 | 13.02358243 | 89.98375250 |
| S | 35.83234077 | 13.57161674 | 89.80352552 |

|    |             |             |             |
|----|-------------|-------------|-------------|
| C  | 35.03693587 | 12.75450819 | 91.20717936 |
| N  | 38.77039717 | 16.25921273 | 93.54742851 |
| C  | 38.71159528 | 16.66555867 | 94.93914585 |
| Zn | 31.69023322 | 14.68815128 | 94.89510192 |
| H  | 31.75576242 | 13.41362417 | 84.31071598 |
| H  | 31.45565104 | 16.52459938 | 89.17953379 |
| H  | 33.18872001 | 16.82291430 | 88.89501136 |
| H  | 30.83666388 | 15.52668372 | 91.83282464 |
| H  | 34.67733631 | 15.99186876 | 93.33369440 |
| H  | 33.59278285 | 14.36328289 | 88.77729772 |
| H  | 27.14445767 | 13.07549013 | 89.56494772 |
| H  | 27.66713478 | 14.09026850 | 88.20849648 |
| H  | 26.85758044 | 15.48117269 | 90.08111664 |
| H  | 28.59152692 | 15.75354040 | 89.88739303 |
| H  | 29.47364880 | 12.78903198 | 90.30469828 |
| H  | 37.92837828 | 18.33427194 | 88.86279587 |
| H  | 37.75292192 | 12.71979401 | 92.10108428 |
| H  | 39.25438449 | 13.16435091 | 91.28933435 |
| H  | 37.59197182 | 11.94632060 | 89.81746352 |
| H  | 38.08698394 | 13.52294039 | 89.16820138 |
| H  | 35.33732301 | 11.71122791 | 91.24996372 |
| H  | 36.86699422 | 15.02507858 | 91.75276834 |
| H  | 39.28009164 | 15.93825100 | 95.53114283 |
| H  | 30.06945210 | 9.25860091  | 92.01771848 |
| H  | 29.88894200 | 10.48409359 | 90.76623294 |
| H  | 29.67362632 | 12.44812838 | 92.88867887 |
| H  | 33.68278948 | 12.27311386 | 93.95210024 |
| H  | 37.48499449 | 12.65615622 | 95.87085373 |
| H  | 37.12036138 | 11.26351260 | 96.91433743 |
| H  | 35.26750547 | 14.26921954 | 95.12715140 |
| H  | 32.47675943 | 12.34312656 | 97.51625838 |
| H  | 33.28273513 | 10.36367707 | 92.39391597 |
| H  | 34.58699873 | 10.91161845 | 97.52585404 |
| H  | 34.83330848 | 16.35998512 | 90.83628628 |
| H  | 35.28989913 | 13.26983406 | 92.13010928 |
| H  | 33.96622873 | 12.82568371 | 91.03522108 |
| H  | 32.63187897 | 15.83156050 | 86.77583547 |
| H  | 30.09115133 | 14.65076966 | 88.13754485 |

|   |             |             |             |
|---|-------------|-------------|-------------|
| H | 31.48168100 | 15.12149330 | 84.71481945 |
| H | 29.22852677 | 12.19937179 | 88.64402916 |
| H | 38.62670189 | 17.01397164 | 92.87913383 |
| H | 39.51872283 | 15.68570340 | 90.65928228 |
| O | 29.19599727 | 14.77965443 | 94.78304013 |
| H | 28.73291478 | 13.94138864 | 94.85313559 |
| H | 28.95380812 | 15.13083012 | 93.88374976 |
| H | 33.12993844 | 14.49828346 | 84.55901448 |
| H | 36.85087067 | 11.18330277 | 95.17860437 |
| H | 37.68613001 | 16.60106837 | 95.23774587 |
| H | 39.11137770 | 17.65218639 | 95.04703360 |
| H | 39.48645694 | 17.88206922 | 89.58559087 |
| H | 38.78185056 | 16.89581887 | 88.29763399 |
| H | 31.32221981 | 9.45216207  | 90.81354687 |

**ZERO**

|   |             |             |             |
|---|-------------|-------------|-------------|
| C | 32.46236810 | 16.12834679 | 89.32121786 |
| C | 32.72576321 | 15.98596847 | 90.78024244 |
| N | 33.97415694 | 16.12201248 | 91.32465866 |
| C | 31.89571839 | 15.68978948 | 91.82763124 |
| C | 33.86095959 | 15.91538735 | 92.64489752 |
| N | 32.61694375 | 15.65457338 | 92.97913335 |
| C | 30.61617766 | 9.98842078  | 91.41257198 |
| C | 31.23896805 | 11.01187848 | 92.30140881 |
| N | 32.54768023 | 10.99652235 | 92.68751912 |
| C | 30.68273768 | 12.08849173 | 92.94208168 |
| C | 32.73658026 | 12.03752894 | 93.51260732 |
| N | 31.62803988 | 12.71104694 | 93.69624676 |
| C | 36.80053853 | 11.82386756 | 96.03419973 |
| C | 35.43535462 | 12.37727174 | 96.24314194 |
| N | 34.47988522 | 11.77663213 | 97.01920213 |
| C | 34.84932324 | 13.51888947 | 95.76669777 |
| C | 33.38320656 | 12.55776411 | 96.98959683 |
| N | 33.57744481 | 13.62002681 | 96.24676896 |
| C | 38.58296445 | 17.50105284 | 89.15730611 |
| C | 37.80435167 | 16.69612093 | 90.19963253 |
| O | 36.60687697 | 16.85514529 | 90.36724908 |

|    |             |             |             |
|----|-------------|-------------|-------------|
| N  | 38.52727880 | 15.75270905 | 90.83321348 |
| C  | 37.94604084 | 14.81577316 | 91.76225965 |
| C  | 38.37181507 | 15.02446735 | 93.21957205 |
| O  | 38.35949923 | 14.09257809 | 94.01916683 |
| C  | 38.18156994 | 13.36417051 | 91.33300510 |
| C  | 37.56713946 | 13.02358243 | 89.98375250 |
| S  | 35.83234077 | 13.57161674 | 89.80352552 |
| C  | 35.03693587 | 12.75450819 | 91.20717936 |
| N  | 38.77039717 | 16.25921273 | 93.54742851 |
| C  | 38.71159528 | 16.66555867 | 94.93914585 |
| Zn | 31.69023322 | 14.68815128 | 94.89510192 |
| H  | 31.45565104 | 16.52459938 | 89.17953379 |
| H  | 33.18872001 | 16.82291430 | 88.89501136 |
| H  | 30.83666388 | 15.52668372 | 91.83282464 |
| H  | 34.67733631 | 15.99186876 | 93.33369440 |
| H  | 37.92837828 | 18.33427194 | 88.86279587 |
| H  | 37.75292192 | 12.71979401 | 92.10108428 |
| H  | 39.25438449 | 13.16435091 | 91.28933435 |
| H  | 37.59197182 | 11.94632060 | 89.81746352 |
| H  | 38.08698394 | 13.52294039 | 89.16820138 |
| H  | 35.33732301 | 11.71122791 | 91.24996372 |
| H  | 36.86699422 | 15.02507858 | 91.75276834 |
| H  | 39.28009164 | 15.93825100 | 95.53114283 |
| H  | 30.06945210 | 9.25860091  | 92.01771848 |
| H  | 29.88894200 | 10.48409359 | 90.76623294 |
| H  | 29.67362632 | 12.44812838 | 92.88867887 |
| H  | 33.68278948 | 12.27311386 | 93.95210024 |
| H  | 37.48499449 | 12.65615622 | 95.87085373 |
| H  | 37.12036138 | 11.26351260 | 96.91433743 |
| H  | 35.26750547 | 14.26921954 | 95.12715140 |
| H  | 32.47675943 | 12.34312656 | 97.51625838 |
| H  | 33.28273513 | 10.36367707 | 92.39391597 |
| H  | 34.58699873 | 10.91161845 | 97.52585404 |
| H  | 34.83330848 | 16.35998512 | 90.83628628 |
| H  | 35.28989913 | 13.26983406 | 92.13010928 |
| H  | 33.96622873 | 12.82568371 | 91.03522108 |
| H  | 38.62670189 | 17.01397164 | 92.87913383 |
| H  | 39.51872283 | 15.68570340 | 90.65928228 |

|   |             |             |             |
|---|-------------|-------------|-------------|
| O | 29.19599727 | 14.77965443 | 94.78304013 |
| H | 28.73291478 | 13.94138864 | 94.85313559 |
| H | 28.95380812 | 15.13083012 | 93.88374976 |
| H | 38.78185056 | 16.89581887 | 88.29763399 |
| H | 39.48645694 | 17.88206922 | 89.58559087 |
| H | 39.11137770 | 17.65218639 | 95.04703360 |
| H | 37.68613001 | 16.60106837 | 95.23774587 |
| H | 36.85087067 | 11.18330277 | 95.17860437 |
| H | 31.32221981 | 9.45216207  | 90.81354687 |
| H | 32.55033580 | 15.18779733 | 88.81869584 |

**3HDB (includes GLU)**

|   |             |             |             |
|---|-------------|-------------|-------------|
| C | 6.98873650  | 35.18037835 | 45.66841833 |
| C | 5.77164504  | 36.07329769 | 45.74327200 |
| O | 5.56655479  | 36.98356033 | 44.94652368 |
| C | 6.61913166  | 33.83079151 | 45.04629287 |
| N | 4.90127329  | 35.75340391 | 46.71720330 |
| C | 3.69254073  | 36.51844560 | 46.96879215 |
| C | 4.09841248  | 37.85221222 | 47.63584853 |
| O | 4.17371548  | 38.86918926 | 46.96444553 |
| C | 2.66424396  | 35.68493134 | 47.73222527 |
| C | 1.40896955  | 36.46177929 | 47.94529159 |
| N | 0.28739833  | 35.92904647 | 48.51782402 |
| C | 1.08983692  | 37.75572058 | 47.64649891 |
| C | -0.64705542 | 36.89011965 | 48.55106409 |
| N | -0.19242223 | 38.01183534 | 48.03375068 |
| N | 4.46148314  | 37.78564525 | 48.92149633 |
| C | 4.82839107  | 38.96422390 | 49.68092488 |
| C | 4.05364579  | 39.08313244 | 50.99168241 |
| C | 2.54210189  | 39.08505226 | 50.79429331 |
| C | 1.99082445  | 40.25959736 | 49.94200694 |
| O | 2.67066584  | 41.27953356 | 49.77694512 |
| O | 0.83027576  | 40.05333182 | 49.49468106 |
| C | 3.45336847  | 40.95789774 | 44.78068438 |
| C | 2.05545384  | 40.77299609 | 45.26186013 |
| N | 1.01930175  | 40.30625578 | 44.50210084 |
| C | 1.52868481  | 40.98549055 | 46.50668625 |

|   |             |             |             |
|---|-------------|-------------|-------------|
| C | -0.06368429 | 40.22648541 | 45.28845202 |
| N | 0.20953333  | 40.63711690 | 46.51282708 |
| C | -5.55255935 | 38.20241671 | 45.82877203 |
| C | -4.46143484 | 39.02261740 | 46.41682026 |
| N | -4.35202266 | 40.37827638 | 46.27216280 |
| C | -3.32747324 | 38.63545296 | 47.07448864 |
| C | -3.19026694 | 40.75552550 | 46.82960975 |
| N | -2.54821945 | 39.72232831 | 47.32277000 |
| C | -0.83018912 | 30.93772043 | 48.43727909 |
| C | -1.15169324 | 32.41698479 | 48.22682626 |
| O | -0.53334157 | 33.29264138 | 48.81046712 |
| N | -2.09713037 | 32.65779331 | 47.30217501 |
| C | -2.49157654 | 33.97972339 | 46.87353143 |
| C | -3.79312322 | 34.47270171 | 47.51863910 |
| O | -4.54311213 | 35.24870089 | 46.93291085 |
| C | -2.58546221 | 34.06387522 | 45.34735615 |
| C | -1.23646156 | 33.92793784 | 44.65593795 |
| S | 0.02889279  | 35.08343876 | 45.29552623 |
| C | -0.66412039 | 36.67643614 | 44.80318298 |
| N | -4.05379491 | 34.01603742 | 48.74318334 |
| C | -5.16688129 | 34.57569112 | 49.47753513 |
| C | -4.07554763 | 41.36433737 | 57.80821400 |
| C | -4.23743060 | 41.05159035 | 56.34359243 |
| O | -4.14692820 | 39.91951007 | 55.88134272 |
| N | -4.55223744 | 42.11494797 | 55.57631376 |
| C | -4.52148867 | 41.98485991 | 54.13717866 |
| C | -3.12066495 | 41.56096539 | 53.66514384 |
| O | -2.11197733 | 41.89582713 | 54.28009372 |
| C | -4.84899128 | 43.32070551 | 53.46166935 |
| C | -3.78629548 | 44.33284263 | 53.85805513 |
| O | -3.76938605 | 44.82965576 | 54.98026244 |
| N | -2.91708106 | 44.65552905 | 52.89621448 |
| N | -3.13065622 | 40.82235728 | 52.55761205 |
| C | -1.96315299 | 40.60692541 | 51.73171755 |
| C | -2.06626657 | 41.61555424 | 50.53185112 |
| O | -1.67215579 | 41.28596644 | 49.39549212 |
| C | -1.79765035 | 39.14723466 | 51.33527026 |
| C | -1.25714211 | 38.25730461 | 52.46279133 |

|    |             |             |             |
|----|-------------|-------------|-------------|
| C  | -2.32344757 | 37.92346923 | 53.50334282 |
| C  | -0.69573465 | 36.96130548 | 51.88229117 |
| O  | -2.56636576 | 42.72147878 | 50.80282216 |
| Zn | -0.70306664 | 39.99010746 | 48.20342654 |
| H  | 6.22163915  | 33.97519838 | 44.04477345 |
| H  | 5.87243997  | 33.31581092 | 45.64398941 |
| H  | 7.50458957  | 33.20511602 | 44.97788210 |
| H  | 7.73618096  | 35.67643775 | 45.04904679 |
| H  | 4.34715650  | 40.02289275 | 51.46127197 |
| H  | 4.32558807  | 38.26329232 | 51.66110503 |
| H  | 2.04250615  | 39.15895679 | 51.76361572 |
| H  | 2.20336001  | 38.16475834 | 50.31539054 |
| H  | 4.61501244  | 39.83362115 | 49.05579121 |
| H  | -0.22632561 | 30.88569081 | 49.35421027 |
| H  | -3.03181872 | 35.02773067 | 45.09938886 |
| H  | -3.25227888 | 33.28309475 | 44.97574468 |
| H  | -1.33584200 | 34.10758160 | 43.58633992 |
| H  | -0.80586125 | 32.94137721 | 44.81538350 |
| H  | 0.06401712  | 37.43513376 | 45.07210785 |
| H  | -0.83028472 | 36.69378533 | 43.73027443 |
| H  | -1.58473260 | 36.87818787 | 45.34140896 |
| H  | -1.70761316 | 34.66838255 | 47.21931181 |
| H  | -5.20636093 | 34.11570309 | 50.46511178 |
| H  | -6.09093641 | 34.37327422 | 48.93249444 |
| H  | -4.89584046 | 41.98735346 | 58.15115701 |
| H  | -5.82160539 | 43.67012338 | 53.80913789 |
| H  | -4.85760227 | 43.18213956 | 52.38214581 |
| H  | -2.12869509 | 45.23153361 | 53.14801671 |
| H  | -2.81731185 | 44.06235637 | 52.07616149 |
| H  | -5.25050172 | 41.22522788 | 53.83735650 |
| H  | -1.08916506 | 39.13141912 | 50.50622740 |
| H  | -2.75085840 | 38.75584494 | 50.97192026 |
| H  | -0.44497112 | 38.80276688 | 52.96039209 |
| H  | -1.91287523 | 37.25659561 | 54.25804268 |
| H  | -2.68415999 | 38.81583430 | 54.00753113 |
| H  | -3.16371463 | 37.42403487 | 53.02494009 |
| H  | -0.27847090 | 36.34204225 | 52.67215008 |
| H  | -1.48988674 | 36.40941502 | 51.38676677 |

|             |             |             |             |
|-------------|-------------|-------------|-------------|
| H           | 0.08410060  | 37.18525079 | 51.16060912 |
| H           | -1.09140346 | 40.94042449 | 52.31258206 |
| H           | 3.27376542  | 36.79891425 | 45.99580575 |
| H           | 3.05861747  | 35.35428704 | 48.69664654 |
| H           | 2.42933182  | 34.79442174 | 47.14191182 |
| H           | 1.69160960  | 38.51977040 | 47.20135040 |
| H           | -1.62735199 | 36.76035152 | 48.96760897 |
| H           | 3.63582769  | 42.00985954 | 44.54547503 |
| H           | 4.12065471  | 40.67179142 | 45.59491361 |
| H           | 2.01565479  | 41.35408604 | 47.38781772 |
| H           | -1.01676053 | 39.87158488 | 44.94597945 |
| H           | -5.74430203 | 37.35527397 | 46.48630011 |
| H           | -6.45932205 | 38.79310854 | 45.69701368 |
| H           | -3.04752864 | 37.65562874 | 47.39844478 |
| H           | -2.83948222 | 41.76526878 | 46.88224744 |
| H           | 1.08753438  | 39.96239525 | 43.54374952 |
| H           | -5.02351556 | 40.98430963 | 45.82534256 |
| H           | 0.14241323  | 34.95536310 | 48.79057768 |
| H           | 5.15324890  | 35.04009959 | 47.38524914 |
| H           | 4.34670323  | 36.93323148 | 49.44860629 |
| H           | 5.90281183  | 38.93927044 | 49.89247612 |
| H           | 7.40231521  | 35.03300869 | 46.66640294 |
| H           | -4.03928024 | 40.44191253 | 58.37940930 |
| H           | -4.37672509 | 43.05095281 | 55.92578273 |
| H           | -4.02163494 | 40.64709607 | 52.09857224 |
| H           | -2.59081795 | 31.87812461 | 46.89274388 |
| H           | -3.41265476 | 33.40294807 | 49.23466285 |
| H           | -3.14315559 | 41.90796182 | 57.94589828 |
| H           | -1.73728772 | 30.38448355 | 48.56377448 |
| H           | -0.25954111 | 30.55587336 | 47.61663686 |
| H           | -5.02259175 | 35.63024886 | 49.58702713 |
| H           | -5.24064167 | 37.82524617 | 44.87727334 |
| H           | 3.68615775  | 40.38186952 | 43.90953534 |
| <b>3HDB</b> |             |             |             |
| C           | 2.66424396  | 35.68493134 | 47.73222527 |
| C           | 1.40896955  | 36.46177929 | 47.94529159 |

|   |             |             |             |
|---|-------------|-------------|-------------|
| N | 0.28739833  | 35.92904647 | 48.51782402 |
| C | 1.08983692  | 37.75572058 | 47.64649891 |
| C | -0.64705542 | 36.89011965 | 48.55106409 |
| N | -0.19242223 | 38.01183534 | 48.03375068 |
| C | 3.45336847  | 40.95789774 | 44.78068438 |
| C | 2.05545384  | 40.77299609 | 45.26186013 |
| N | 1.01930175  | 40.30625578 | 44.50210084 |
| C | 1.52868481  | 40.98549055 | 46.50668625 |
| C | -0.06368429 | 40.22648541 | 45.28845202 |
| N | 0.20953333  | 40.63711690 | 46.51282708 |
| C | -5.55255935 | 38.20241671 | 45.82877203 |
| C | -4.46143484 | 39.02261740 | 46.41682026 |
| N | -4.35202266 | 40.37827638 | 46.27216280 |
| C | -3.32747324 | 38.63545296 | 47.07448864 |
| C | -3.19026694 | 40.75552550 | 46.82960975 |
| N | -2.54821945 | 39.72232831 | 47.32277000 |
| C | -0.83018912 | 30.93772043 | 48.43727909 |
| C | -1.15169324 | 32.41698479 | 48.22682626 |
| O | -0.53334157 | 33.29264138 | 48.81046712 |
| N | -2.09713037 | 32.65779331 | 47.30217501 |
| C | -2.49157654 | 33.97972339 | 46.87353143 |
| C | -3.79312322 | 34.47270171 | 47.51863910 |
| O | -4.54311213 | 35.24870089 | 46.93291085 |
| C | -2.58546221 | 34.06387522 | 45.34735615 |
| C | -1.23646156 | 33.92793784 | 44.65593795 |
| S | 0.02889279  | 35.08343876 | 45.29552623 |
| C | -0.66412039 | 36.67643614 | 44.80318298 |
| N | -4.05379491 | 34.01603742 | 48.74318334 |
| C | -5.16688129 | 34.57569112 | 49.47753513 |
| C | -4.07554763 | 41.36433737 | 57.80821400 |
| C | -4.23743060 | 41.05159035 | 56.34359243 |
| O | -4.14692820 | 39.91951007 | 55.88134272 |
| N | -4.55223744 | 42.11494797 | 55.57631376 |
| C | -4.52148867 | 41.98485991 | 54.13717866 |
| C | -3.12066495 | 41.56096539 | 53.66514384 |
| O | -2.11197733 | 41.89582713 | 54.28009372 |
| C | -4.84899128 | 43.32070551 | 53.46166935 |
| C | -3.78629548 | 44.33284263 | 53.85805513 |

|    |             |             |             |
|----|-------------|-------------|-------------|
| O  | -3.76938605 | 44.82965576 | 54.98026244 |
| N  | -2.91708106 | 44.65552905 | 52.89621448 |
| N  | -3.13065622 | 40.82235728 | 52.55761205 |
| C  | -1.96315299 | 40.60692541 | 51.73171755 |
| C  | -2.06626657 | 41.61555424 | 50.53185112 |
| O  | -1.67215579 | 41.28596644 | 49.39549212 |
| C  | -1.79765035 | 39.14723466 | 51.33527026 |
| C  | -1.25714211 | 38.25730461 | 52.46279133 |
| C  | -2.32344757 | 37.92346923 | 53.50334282 |
| C  | -0.69573465 | 36.96130548 | 51.88229117 |
| O  | -2.56636576 | 42.72147878 | 50.80282216 |
| Zn | -0.70306664 | 39.99010746 | 48.20342654 |
| H  | -0.22632561 | 30.88569081 | 49.35421027 |
| H  | -3.03181872 | 35.02773067 | 45.09938886 |
| H  | -3.25227888 | 33.28309475 | 44.97574468 |
| H  | -1.33584200 | 34.10758160 | 43.58633992 |
| H  | -0.80586125 | 32.94137721 | 44.81538350 |
| H  | 0.06401712  | 37.43513376 | 45.07210785 |
| H  | -0.83028472 | 36.69378533 | 43.73027443 |
| H  | -1.58473260 | 36.87818787 | 45.34140896 |
| H  | -1.70761316 | 34.66838255 | 47.21931181 |
| H  | -5.20636093 | 34.11570309 | 50.46511178 |
| H  | -6.09093641 | 34.37327422 | 48.93249444 |
| H  | -4.89584046 | 41.98735346 | 58.15115701 |
| H  | -5.82160539 | 43.67012338 | 53.80913789 |
| H  | -4.85760227 | 43.18213956 | 52.38214581 |
| H  | -2.12869509 | 45.23153361 | 53.14801671 |
| H  | -2.81731185 | 44.06235637 | 52.07616149 |
| H  | -5.25050172 | 41.22522788 | 53.83735650 |
| H  | -1.08916506 | 39.13141912 | 50.50622740 |
| H  | -2.75085840 | 38.75584494 | 50.97192026 |
| H  | -0.44497112 | 38.80276688 | 52.96039209 |
| H  | -1.91287523 | 37.25659561 | 54.25804268 |
| H  | -2.68415999 | 38.81583430 | 54.00753113 |
| H  | -3.16371463 | 37.42403487 | 53.02494009 |
| H  | -0.27847090 | 36.34204225 | 52.67215008 |
| H  | -1.48988674 | 36.40941502 | 51.38676677 |
| H  | 0.08410060  | 37.18525079 | 51.16060912 |

|   |             |             |             |
|---|-------------|-------------|-------------|
| H | -1.09140346 | 40.94042449 | 52.31258206 |
| H | 3.05861747  | 35.35428704 | 48.69664654 |
| H | 2.42933182  | 34.79442174 | 47.14191182 |
| H | 1.69160960  | 38.51977040 | 47.20135040 |
| H | -1.62735199 | 36.76035152 | 48.96760897 |
| H | 3.63582769  | 42.00985954 | 44.54547503 |
| H | 4.12065471  | 40.67179142 | 45.59491361 |
| H | 2.01565479  | 41.35408604 | 47.38781772 |
| H | -1.01676053 | 39.87158488 | 44.94597945 |
| H | -5.74430203 | 37.35527397 | 46.48630011 |
| H | -6.45932205 | 38.79310854 | 45.69701368 |
| H | -3.04752864 | 37.65562874 | 47.39844478 |
| H | -2.83948222 | 41.76526878 | 46.88224744 |
| H | 1.08753438  | 39.96239525 | 43.54374952 |
| H | -5.02351556 | 40.98430963 | 45.82534256 |
| H | 0.14241323  | 34.95536310 | 48.79057768 |
| H | -4.03928024 | 40.44191253 | 58.37940930 |
| H | -4.37672509 | 43.05095281 | 55.92578273 |
| H | -4.02163494 | 40.64709607 | 52.09857224 |
| H | -2.59081795 | 31.87812461 | 46.89274388 |
| H | -3.41265476 | 33.40294807 | 49.23466285 |
| H | -3.14315559 | 41.90796182 | 57.94589828 |
| H | -5.02259175 | 35.63024886 | 49.58702713 |
| H | -1.73728772 | 30.38448355 | 48.56377448 |
| H | -0.25954111 | 30.55587336 | 47.61663686 |
| H | 3.38429215  | 36.26858622 | 47.19764358 |
| H | 3.68615775  | 40.38186952 | 43.90953534 |
| H | -5.24064167 | 37.82524617 | 44.87727334 |

**3K7N (includes GLU)**

|   |              |              |             |
|---|--------------|--------------|-------------|
| C | -23.84134209 | -36.25047796 | 20.81460092 |
| C | -23.60639069 | -37.33659989 | 19.79776286 |
| O | -22.63905509 | -38.08795809 | 19.82014224 |
| N | -24.54214426 | -37.40350366 | 18.82620005 |
| C | -24.54003307 | -38.47619725 | 17.84931796 |
| C | -23.12027994 | -38.69601529 | 17.32124408 |
| O | -22.65171691 | -39.82282127 | 17.22162415 |

|    |              |              |             |
|----|--------------|--------------|-------------|
| C  | -25.48885593 | -38.17242078 | 16.67665328 |
| C  | -25.46348234 | -39.28453340 | 15.68257682 |
| N  | -22.48585826 | -37.58904738 | 16.93365153 |
| C  | -21.12925038 | -37.58672469 | 16.43157700 |
| C  | -20.88301977 | -36.43296193 | 15.46726979 |
| C  | -21.72979283 | -36.53925393 | 14.20515644 |
| C  | -21.40630256 | -37.78374059 | 13.33575434 |
| O  | -22.28081610 | -38.07696948 | 12.48170232 |
| O  | -20.33699695 | -38.39069941 | 13.51422763 |
| C  | -19.71910195 | -41.21825239 | 17.11105810 |
| C  | -20.72431752 | -41.80970526 | 16.18211322 |
| N  | -21.46306992 | -42.92694123 | 16.44216665 |
| C  | -21.09606090 | -41.41265244 | 14.92376380 |
| C  | -22.24427541 | -43.15079936 | 15.37284432 |
| N  | -22.03950323 | -42.26092462 | 14.43256819 |
| C  | -24.63702350 | -47.27530276 | 15.04828577 |
| C  | -24.09838045 | -46.27311438 | 14.09043165 |
| N  | -22.95712592 | -46.44315855 | 13.35376796 |
| C  | -24.57756169 | -45.04034388 | 13.73850461 |
| C  | -22.79626869 | -45.34083078 | 12.59625716 |
| N  | -23.76203253 | -44.47947568 | 12.80340877 |
| C  | -30.98067709 | -41.30723824 | 18.12838540 |
| C  | -29.66735019 | -41.73963872 | 17.47330411 |
| O  | -28.92703957 | -40.92501764 | 16.94751751 |
| N  | -29.36181741 | -43.04110279 | 17.62522543 |
| C  | -28.12270480 | -43.61355599 | 17.16089238 |
| C  | -28.29331700 | -44.63411264 | 16.03093299 |
| O  | -27.46066027 | -45.51818662 | 15.84831894 |
| C  | -27.30063370 | -44.20861929 | 18.30873139 |
| C  | -26.79128396 | -43.16425724 | 19.28905888 |
| S  | -25.94907576 | -41.75167082 | 18.48984559 |
| C  | -24.67947897 | -42.57274358 | 17.49468294 |
| N  | -29.39334647 | -44.50726686 | 15.28320333 |
| C  | -29.44981208 | -45.15688550 | 13.98380258 |
| Zn | -23.51654623 | -41.97427303 | 12.64033094 |
| O  | -21.81742084 | -40.50077916 | 11.52309627 |
| H  | -22.99741902 | -36.20413576 | 21.49667053 |
| H  | -19.83082079 | -36.46143028 | 15.17987719 |

|   |              |              |             |
|---|--------------|--------------|-------------|
| H | -21.08023449 | -35.48178431 | 15.96775189 |
| H | -21.56300697 | -35.66852375 | 13.56550627 |
| H | -22.79651177 | -36.58027869 | 14.43523159 |
| H | -20.96510397 | -38.53396540 | 15.91324138 |
| H | -31.17120635 | -40.28380389 | 17.77529797 |
| H | -26.45329103 | -44.73627479 | 17.86983260 |
| H | -27.90437415 | -44.93641670 | 18.85466898 |
| H | -26.09111691 | -43.61528110 | 19.99237855 |
| H | -27.60690221 | -42.69989381 | 19.84053210 |
| H | -23.99084575 | -41.79405610 | 17.17743178 |
| H | -25.12946825 | -43.02854920 | 16.61654502 |
| H | -24.15315129 | -43.31294025 | 18.09068313 |
| H | -27.56070253 | -42.77953924 | 16.71662687 |
| H | -29.27047489 | -46.22836064 | 14.12682305 |
| H | -24.85101199 | -39.41801377 | 18.32365226 |
| H | -25.18268601 | -37.24443622 | 16.18993601 |
| H | -26.50444658 | -38.06243762 | 17.05970968 |
| H | -18.70982260 | -41.51540606 | 16.81130764 |
| H | -19.77707874 | -40.13233137 | 17.01468824 |
| H | -20.74429787 | -40.56994646 | 14.36103012 |
| H | -22.94131036 | -43.96002886 | 15.31848931 |
| H | -25.72392945 | -47.27030173 | 14.96800360 |
| H | -24.26364290 | -48.27250488 | 14.81182382 |
| H | -25.45799314 | -44.54156261 | 14.08927558 |
| H | -21.98971145 | -45.19421438 | 11.90870792 |
| H | -21.50690160 | -43.45987393 | 17.30126067 |
| H | -22.35370755 | -47.25104605 | 13.37256085 |
| H | -25.38058683 | -36.84641312 | 18.90407580 |
| H | -22.91196484 | -36.68832542 | 17.09259089 |
| H | -23.96240187 | -35.28988813 | 20.32106601 |
| H | -24.74318840 | -36.46995925 | 21.38117848 |
| H | -20.42866305 | -37.52269886 | 17.27385867 |
| H | -29.95926636 | -43.66568693 | 15.37219461 |
| H | -30.03062738 | -43.65996940 | 18.05866800 |
| H | -20.90975423 | -40.65125378 | 11.79902903 |
| H | -22.02361184 | -39.57637605 | 11.82863340 |
| C | -24.53467321 | -39.63670967 | 14.73902710 |
| C | -26.08644806 | -41.10456581 | 14.64587722 |

|   |              |              |             |
|---|--------------|--------------|-------------|
| N | -24.93786925 | -40.76773178 | 14.10515824 |
| N | -26.44383866 | -40.23643752 | 15.60480532 |
| H | -27.28866985 | -40.29577001 | 16.16707876 |
| H | -23.62278670 | -39.14738104 | 14.46198695 |
| H | -26.68279432 | -41.93816799 | 14.33394107 |
| H | -30.41254935 | -44.98586963 | 13.54930226 |
| H | -28.65626398 | -44.74927467 | 13.39301090 |
| H | -31.78895464 | -41.94785731 | 17.84343871 |
| H | -24.38099018 | -47.03726672 | 16.05956505 |
| H | -19.84562649 | -41.48710022 | 18.13897463 |
| H | -30.86864675 | -41.30725528 | 19.19250438 |

**3K7N**

|   |              |              |             |
|---|--------------|--------------|-------------|
| C | -25.48885593 | -38.17242078 | 16.67665328 |
| C | -25.46348234 | -39.28453340 | 15.68257682 |
| C | -19.71910195 | -41.21825239 | 17.11105810 |
| C | -20.72431752 | -41.80970526 | 16.18211322 |
| N | -21.46306992 | -42.92694123 | 16.44216665 |
| C | -21.09606090 | -41.41265244 | 14.92376380 |
| C | -22.24427541 | -43.15079936 | 15.37284432 |
| N | -22.03950323 | -42.26092462 | 14.43256819 |
| C | -24.63702350 | -47.27530276 | 15.04828577 |
| C | -24.09838045 | -46.27311438 | 14.09043165 |
| N | -22.95712592 | -46.44315855 | 13.35376796 |
| C | -24.57756169 | -45.04034388 | 13.73850461 |
| C | -22.79626869 | -45.34083078 | 12.59625716 |
| N | -23.76203253 | -44.47947568 | 12.80340877 |
| C | -30.98067709 | -41.30723824 | 18.12838540 |
| C | -29.66735019 | -41.73963872 | 17.47330411 |
| O | -28.92703957 | -40.92501764 | 16.94751751 |
| N | -29.36181741 | -43.04110279 | 17.62522543 |
| C | -28.12270480 | -43.61355599 | 17.16089238 |
| C | -28.29331700 | -44.63411264 | 16.03093299 |
| O | -27.46066027 | -45.51818662 | 15.84831894 |
| C | -27.30063370 | -44.20861929 | 18.30873139 |
| C | -26.79128396 | -43.16425724 | 19.28905888 |
| S | -25.94907576 | -41.75167082 | 18.48984559 |

|    |              |              |             |
|----|--------------|--------------|-------------|
| C  | -24.67947897 | -42.57274358 | 17.49468294 |
| N  | -29.39334647 | -44.50726686 | 15.28320333 |
| C  | -29.44981208 | -45.15688550 | 13.98380258 |
| Zn | -23.51654623 | -41.97427303 | 12.64033094 |
| O  | -21.81742084 | -40.50077916 | 11.52309627 |
| H  | -31.17120635 | -40.28380389 | 17.77529797 |
| H  | -26.45329103 | -44.73627479 | 17.86983260 |
| H  | -27.90437415 | -44.93641670 | 18.85466898 |
| H  | -26.09111691 | -43.61528110 | 19.99237855 |
| H  | -27.60690221 | -42.69989381 | 19.84053210 |
| H  | -23.99084575 | -41.79405610 | 17.17743178 |
| H  | -25.12946825 | -43.02854920 | 16.61654502 |
| H  | -24.15315129 | -43.31294025 | 18.09068313 |
| H  | -27.56070253 | -42.77953924 | 16.71662687 |
| H  | -29.27047489 | -46.22836064 | 14.12682305 |
| H  | -25.18268601 | -37.24443622 | 16.18993601 |
| H  | -26.50444658 | -38.06243762 | 17.05970968 |
| H  | -18.70982260 | -41.51540606 | 16.81130764 |
| H  | -19.77707874 | -40.13233137 | 17.01468824 |
| H  | -20.74429787 | -40.56994646 | 14.36103012 |
| H  | -22.94131036 | -43.96002886 | 15.31848931 |
| H  | -25.72392945 | -47.27030173 | 14.96800360 |
| H  | -24.26364290 | -48.27250488 | 14.81182382 |
| H  | -25.45799314 | -44.54156261 | 14.08927558 |
| H  | -21.98971145 | -45.19421438 | 11.90870792 |
| H  | -21.50690160 | -43.45987393 | 17.30126067 |
| H  | -22.35370755 | -47.25104605 | 13.37256085 |
| H  | -29.95926636 | -43.66568693 | 15.37219461 |
| H  | -30.03062738 | -43.65996940 | 18.05866800 |
| H  | -20.90975423 | -40.65125378 | 11.79902903 |
| H  | -22.02361184 | -39.57637605 | 11.82863340 |
| C  | -24.53467321 | -39.63670967 | 14.73902710 |
| C  | -26.08644806 | -41.10456581 | 14.64587722 |
| N  | -24.93786925 | -40.76773178 | 14.10515824 |
| N  | -26.44383866 | -40.23643752 | 15.60480532 |
| H  | -27.28866985 | -40.29577001 | 16.16707876 |
| H  | -23.62278670 | -39.14738104 | 14.46198695 |
| H  | -26.68279432 | -41.93816799 | 14.33394107 |

|   |              |              |             |
|---|--------------|--------------|-------------|
| H | -30.86864675 | -41.30725528 | 19.19250438 |
| H | -31.78895464 | -41.94785731 | 17.84343871 |
| H | -30.41254935 | -44.98586963 | 13.54930226 |
| H | -28.65626398 | -44.74927467 | 13.39301090 |
| H | -24.82906441 | -38.38366057 | 17.49209972 |
| H | -19.84562649 | -41.48710022 | 18.13897463 |
| H | -24.38099018 | -47.03726672 | 16.05956505 |

**4Q1L (includes GLU)**

|   |              |              |             |
|---|--------------|--------------|-------------|
| C | -6.66904555  | -6.60675078  | 9.02765342  |
| C | -7.84980076  | -7.33250994  | 8.72087401  |
| O | -7.85983056  | -8.32173729  | 7.95778480  |
| N | -9.01365796  | -6.93145621  | 9.34902197  |
| C | -10.27003402 | -7.53537891  | 8.96372177  |
| C | -10.45876374 | -7.45021029  | 7.44231523  |
| O | -10.59719520 | -8.45100446  | 6.74767903  |
| C | -11.43332904 | -6.86704918  | 9.71194032  |
| C | -12.74230758 | -7.47278972  | 9.34822873  |
| N | -13.61695011 | -7.99146362  | 10.25847651 |
| C | -13.32097722 | -7.67777314  | 8.12813377  |
| C | -14.66727229 | -8.47889098  | 9.58781853  |
| N | -14.51391425 | -8.31439725  | 8.28778062  |
| N | -10.40745349 | -6.20564605  | 6.96090697  |
| C | -10.84714556 | -5.86943061  | 5.62368440  |
| C | -10.10650623 | -4.65579040  | 5.05517020  |
| C | -9.91778386  | -3.52167752  | 6.07010875  |
| C | -11.17182192 | -3.28622285  | 6.96412657  |
| O | -12.08256415 | -2.56536730  | 6.52598358  |
| O | -11.14366316 | -3.84947912  | 8.08803059  |
| C | -10.73974109 | -10.76310541 | 4.60270550  |
| C | -12.12316233 | -10.82451190 | 5.14280571  |
| N | -12.79218965 | -11.96171545 | 5.50143533  |
| C | -13.00020590 | -9.80194736  | 5.36807842  |
| C | -14.01005582 | -11.60736631 | 5.93547576  |
| N | -14.16919823 | -10.29969651 | 5.86371896  |
| C | -18.45759890 | -12.28794418 | 10.13242694 |
| C | -17.99688602 | -11.31137848 | 9.10480011  |

|    |              |              |             |
|----|--------------|--------------|-------------|
| N  | -18.86671593 | -10.47015761 | 8.46984522  |
| C  | -16.76966810 | -11.04445900 | 8.56546751  |
| C  | -18.16869676 | -9.73533993  | 7.60329221  |
| N  | -16.89188541 | -10.06236871 | 7.62304982  |
| C  | -12.29467431 | -8.91420805  | 14.99481711 |
| C  | -13.21302303 | -9.14561164  | 13.79957617 |
| O  | -13.55878547 | -8.22974217  | 13.06119201 |
| N  | -13.55893799 | -10.41984184 | 13.58489209 |
| C  | -14.36659253 | -10.83734056 | 12.45332719 |
| C  | -15.85392146 | -10.77641979 | 12.82864647 |
| O  | -16.56735750 | -11.76805120 | 12.91177246 |
| C  | -13.92543052 | -12.21135832 | 11.95402908 |
| C  | -12.44848786 | -12.22110051 | 11.57535964 |
| S  | -12.00477666 | -10.85166066 | 10.43924300 |
| C  | -12.46230618 | -11.56705646 | 8.84354926  |
| N  | -16.29287480 | -9.53896565  | 13.06498057 |
| C  | -17.63710491 | -9.29271631  | 13.54264487 |
| C  | -19.96708523 | -5.08090191  | 3.78509039  |
| C  | -18.51906350 | -4.74773550  | 4.06316489  |
| O  | -17.95996775 | -3.75183658  | 3.61954368  |
| N  | -17.90048295 | -5.63694633  | 4.85967633  |
| C  | -16.50028942 | -5.57013657  | 5.19980814  |
| C  | -15.99098875 | -6.97801275  | 5.48911810  |
| O  | -14.77706485 | -7.19633411  | 5.58248635  |
| C  | -16.23846697 | -4.69837246  | 6.44911653  |
| C  | -16.50336634 | -5.37840626  | 7.75532511  |
| C  | -17.49252323 | -6.25892578  | 8.09546614  |
| C  | -15.71578939 | -5.19027765  | 8.93488495  |
| N  | -17.38252628 | -6.62327604  | 9.41128225  |
| C  | -16.30054664 | -5.99107614  | 9.94745388  |
| C  | -14.58334231 | -4.43214810  | 9.23444881  |
| C  | -15.78765128 | -6.02243058  | 11.23789821 |
| C  | -14.07711184 | -4.47805039  | 10.51423278 |
| C  | -14.67343263 | -5.25980466  | 11.50825780 |
| O  | -16.84466055 | -7.88273942  | 5.67165499  |
| Zn | -15.47193567 | -8.99916662  | 6.67595165  |
| H  | -5.81351662  | -7.22047155  | 8.83708301  |
| H  | -10.68896223 | -4.28509104  | 4.21000747  |

|   |              |              |             |
|---|--------------|--------------|-------------|
| H | -9.12620603  | -4.96083466  | 4.68016726  |
| H | -9.69901817  | -2.59289642  | 5.54054848  |
| H | -9.08975351  | -3.75119113  | 6.74370319  |
| H | -11.92318541 | -5.64091081  | 5.65357379  |
| H | -12.31301060 | -7.83239255  | 15.18990386 |
| H | -14.52311426 | -12.46915160 | 11.07868257 |
| H | -14.10837961 | -12.96795560 | 12.71902494 |
| H | -12.17893338 | -13.15208750 | 11.08196476 |
| H | -11.81045622 | -12.07745056 | 12.44480653 |
| H | -12.50713935 | -10.73861908 | 8.14313940  |
| H | -11.69619920 | -12.27472027 | 8.53613176  |
| H | -14.19361732 | -10.10552081 | 11.65743733 |
| H | -17.90964383 | -10.14931576 | 14.17169366 |
| H | -20.39610076 | -4.31132044  | 3.15065424  |
| H | -16.84560220 | -3.79202935  | 6.34754592  |
| H | -15.19096067 | -4.38620101  | 6.43100179  |
| H | -18.29961644 | -6.63171802  | 7.49818758  |
| H | -14.09976101 | -3.82582225  | 8.47931170  |
| H | -13.19667238 | -3.89608728  | 10.74788111 |
| H | -16.24260502 | -6.63808130  | 11.99637465 |
| H | -14.24468960 | -5.27035294  | 12.49833036 |
| H | -15.94927690 | -5.13199024  | 4.35836479  |
| H | -10.22894293 | -8.60186001  | 9.21987434  |
| H | -11.45577161 | -5.79928997  | 9.47185048  |
| H | -11.27083071 | -6.97885823  | 10.78427358 |
| H | -12.97932779 | -7.39177991  | 7.15826493  |
| H | -15.52426285 | -8.93698834  | 10.04101672 |
| H | -10.70777022 | -11.15629228 | 3.58316413  |
| H | -10.45867210 | -9.70977295  | 4.57690215  |
| H | -12.86473451 | -8.75508413  | 5.19866735  |
| H | -14.74537264 | -12.29502259 | 6.30165285  |
| H | -18.49413718 | -11.80042441 | 11.10965285 |
| H | -19.46296264 | -12.62670072 | 9.87134574  |
| H | -15.82125595 | -11.49268576 | 8.77316957  |
| H | -18.59264742 | -9.00118656  | 6.95189710  |
| H | -20.51843278 | -5.12922185  | 4.71995124  |
| H | -20.03377684 | -6.04248968  | 3.28324408  |
| H | -10.70147232 | -6.74408465  | 4.98361390  |

|   |              |              |             |
|---|--------------|--------------|-------------|
| H | -13.42575331 | -12.05847474 | 8.92390065  |
| H | -9.06203516  | -5.97263802  | 9.65684054  |
| H | -10.51728917 | -5.41639118  | 7.60907955  |
| H | -18.34771616 | -6.50763819  | 5.11618713  |
| H | -15.65115588 | -8.75765922  | 13.01717775 |
| H | -13.31024826 | -11.12625036 | 14.26107726 |
| H | -17.89863881 | -7.36611241  | 9.86177040  |
| H | -12.41868432 | -12.89845404 | 5.45989160  |
| H | -19.83928314 | -10.28412792 | 8.71818120  |
| H | -13.51273930 | -7.96568489  | 11.27656477 |
| H | -6.68228117  | -6.32376133  | 10.05946822 |
| H | -6.62131085  | -5.72895775  | 8.41765276  |
| H | -18.31700794 | -9.24807301  | 12.71763648 |
| H | -17.67254461 | -8.38859016  | 14.11378402 |
| H | -11.29244032 | -9.21448669  | 14.77063023 |
| H | -12.66400124 | -9.45037150  | 15.84394983 |
| H | -17.81426927 | -13.13835349 | 10.22091979 |
| H | -10.00833720 | -11.29569409 | 5.17393019  |

**4Q1L**

|   |              |              |             |
|---|--------------|--------------|-------------|
| C | -11.43332904 | -6.86704918  | 9.71194032  |
| C | -12.74230758 | -7.47278972  | 9.34822873  |
| N | -13.61695011 | -7.99146362  | 10.25847651 |
| C | -13.32097722 | -7.67777314  | 8.12813377  |
| C | -14.66727229 | -8.47889098  | 9.58781853  |
| N | -14.51391425 | -8.31439725  | 8.28778062  |
| C | -10.73974109 | -10.76310541 | 4.60270550  |
| C | -12.12316233 | -10.82451190 | 5.14280571  |
| N | -12.79218965 | -11.96171545 | 5.50143533  |
| C | -13.00020590 | -9.80194736  | 5.36807842  |
| C | -14.01005582 | -11.60736631 | 5.93547576  |
| N | -14.16919823 | -10.29969651 | 5.86371896  |
| C | -18.45759890 | -12.28794418 | 10.13242694 |
| C | -17.99688602 | -11.31137848 | 9.10480011  |
| N | -18.86671593 | -10.47015761 | 8.46984522  |
| C | -16.76966810 | -11.04445900 | 8.56546751  |
| C | -18.16869676 | -9.73533993  | 7.60329221  |

|    |              |              |             |
|----|--------------|--------------|-------------|
| N  | -16.89188541 | -10.06236871 | 7.62304982  |
| C  | -12.29467431 | -8.91420805  | 14.99481711 |
| C  | -13.21302303 | -9.14561164  | 13.79957617 |
| O  | -13.55878547 | -8.22974217  | 13.06119201 |
| N  | -13.55893799 | -10.41984184 | 13.58489209 |
| C  | -14.36659253 | -10.83734056 | 12.45332719 |
| C  | -15.85392146 | -10.77641979 | 12.82864647 |
| O  | -16.56735750 | -11.76805120 | 12.91177246 |
| C  | -13.92543052 | -12.21135832 | 11.95402908 |
| C  | -12.44848786 | -12.22110051 | 11.57535964 |
| S  | -12.00477666 | -10.85166066 | 10.43924300 |
| C  | -12.46230618 | -11.56705646 | 8.84354926  |
| N  | -16.29287480 | -9.53896565  | 13.06498057 |
| C  | -17.63710491 | -9.29271631  | 13.54264487 |
| C  | -19.96708523 | -5.08090191  | 3.78509039  |
| C  | -18.51906350 | -4.74773550  | 4.06316489  |
| O  | -17.95996775 | -3.75183658  | 3.61954368  |
| N  | -17.90048295 | -5.63694633  | 4.85967633  |
| C  | -16.50028942 | -5.57013657  | 5.19980814  |
| C  | -15.99098875 | -6.97801275  | 5.48911810  |
| O  | -14.77706485 | -7.19633411  | 5.58248635  |
| C  | -16.23846697 | -4.69837246  | 6.44911653  |
| C  | -16.50336634 | -5.37840626  | 7.75532511  |
| C  | -17.49252323 | -6.25892578  | 8.09546614  |
| C  | -15.71578939 | -5.19027765  | 8.93488495  |
| N  | -17.38252628 | -6.62327604  | 9.41128225  |
| C  | -16.30054664 | -5.99107614  | 9.94745388  |
| C  | -14.58334231 | -4.43214810  | 9.23444881  |
| C  | -15.78765128 | -6.02243058  | 11.23789821 |
| C  | -14.07711184 | -4.47805039  | 10.51423278 |
| C  | -14.67343263 | -5.25980466  | 11.50825780 |
| O  | -16.84466055 | -7.88273942  | 5.67165499  |
| Zn | -15.47193567 | -8.99916662  | 6.67595165  |
| H  | -12.31301060 | -7.83239255  | 15.18990386 |
| H  | -14.52311426 | -12.46915160 | 11.07868257 |
| H  | -14.10837961 | -12.96795560 | 12.71902494 |
| H  | -12.17893338 | -13.15208750 | 11.08196476 |
| H  | -11.81045622 | -12.07745056 | 12.44480653 |

|   |              |              |             |
|---|--------------|--------------|-------------|
| H | -12.50713935 | -10.73861908 | 8.14313940  |
| H | -11.69619920 | -12.27472027 | 8.53613176  |
| H | -14.19361732 | -10.10552081 | 11.65743733 |
| H | -17.90964383 | -10.14931576 | 14.17169366 |
| H | -20.39610076 | -4.31132044  | 3.15065424  |
| H | -16.84560220 | -3.79202935  | 6.34754592  |
| H | -15.19096067 | -4.38620101  | 6.43100179  |
| H | -18.29961644 | -6.63171802  | 7.49818758  |
| H | -14.09976101 | -3.82582225  | 8.47931170  |
| H | -13.19667238 | -3.89608728  | 10.74788111 |
| H | -16.24260502 | -6.63808130  | 11.99637465 |
| H | -14.24468960 | -5.27035294  | 12.49833036 |
| H | -15.94927690 | -5.13199024  | 4.35836479  |
| H | -11.45577161 | -5.79928997  | 9.47185048  |
| H | -11.27083071 | -6.97885823  | 10.78427358 |
| H | -12.97932779 | -7.39177991  | 7.15826493  |
| H | -15.52426285 | -8.93698834  | 10.04101672 |
| H | -10.70777022 | -11.15629228 | 3.58316413  |
| H | -10.45867210 | -9.70977295  | 4.57690215  |
| H | -12.86473451 | -8.75508413  | 5.19866735  |
| H | -14.74537264 | -12.29502259 | 6.30165285  |
| H | -18.49413718 | -11.80042441 | 11.10965285 |
| H | -19.46296264 | -12.62670072 | 9.87134574  |
| H | -15.82125595 | -11.49268576 | 8.77316957  |
| H | -18.59264742 | -9.00118656  | 6.95189710  |
| H | -20.51843278 | -5.12922185  | 4.71995124  |
| H | -20.03377684 | -6.04248968  | 3.28324408  |
| H | -13.42575331 | -12.05847474 | 8.92390065  |
| H | -18.34771616 | -6.50763819  | 5.11618713  |
| H | -15.65115588 | -8.75765922  | 13.01717775 |
| H | -13.31024826 | -11.12625036 | 14.26107726 |
| H | -17.89863881 | -7.36611241  | 9.86177040  |
| H | -12.41868432 | -12.89845404 | 5.45989160  |
| H | -19.83928314 | -10.28412792 | 8.71818120  |
| H | -13.51273930 | -7.96568489  | 11.27656477 |
| H | -11.29244032 | -9.21448669  | 14.77063023 |
| H | -12.66400124 | -9.45037150  | 15.84394983 |
| H | -17.67254461 | -8.38859016  | 14.11378402 |

|   |              |              |             |
|---|--------------|--------------|-------------|
| H | -18.31700794 | -9.24807301  | 12.71763648 |
| H | -17.81426927 | -13.13835349 | 10.22091979 |
| H | -10.00833720 | -11.29569409 | 5.17393019  |
| H | -10.62303888 | -7.33257254  | 9.19077061  |
